# Supplementary material
Source: PubMed Central journal article supplement (PMC10147588)

# Western Blot Overview

## Enhanced Ca<sup>2+</sup>-dependent SK-channel gating and membrane trafficking in human atrial fibrillation

Jordi Heijman, PhD; Xiaobo Zhou, MD; Stefano Morotti, PhD; Cristina E. Molina, PhD; Issam H. Abu-Taha, PhD; Marcel Tekook, PhD; Thomas Jespersen, PhD; Yiqiao Zhang; Shokoufeh Dobrev, PhD; Hendrik Milting, PhD; Jan Gummert, MD; Matthias Karck, MD; Markus Kamler, MD; Ali El-Armouche, MD, Arnela Saljic, PhD; Eleonora Grandi, PhD; Stanley Nattel, MD; Dobromir Dobrev, MD

**Note:** Given the limited availability of human atrial tissue samples, most gels were physically cut to enable incubation with different antibodies against proteins with distinct molecular weights. These fragments are shown in the subsequent slides. Unless otherwise indicated, samples are loaded in pairs: two Ctl samples followed by two cAF samples, etc. with molecular weight markers in the first and/or last lanes. Only samples that were used in the representative blots and/or quantitative analysis are marked.

# SK1

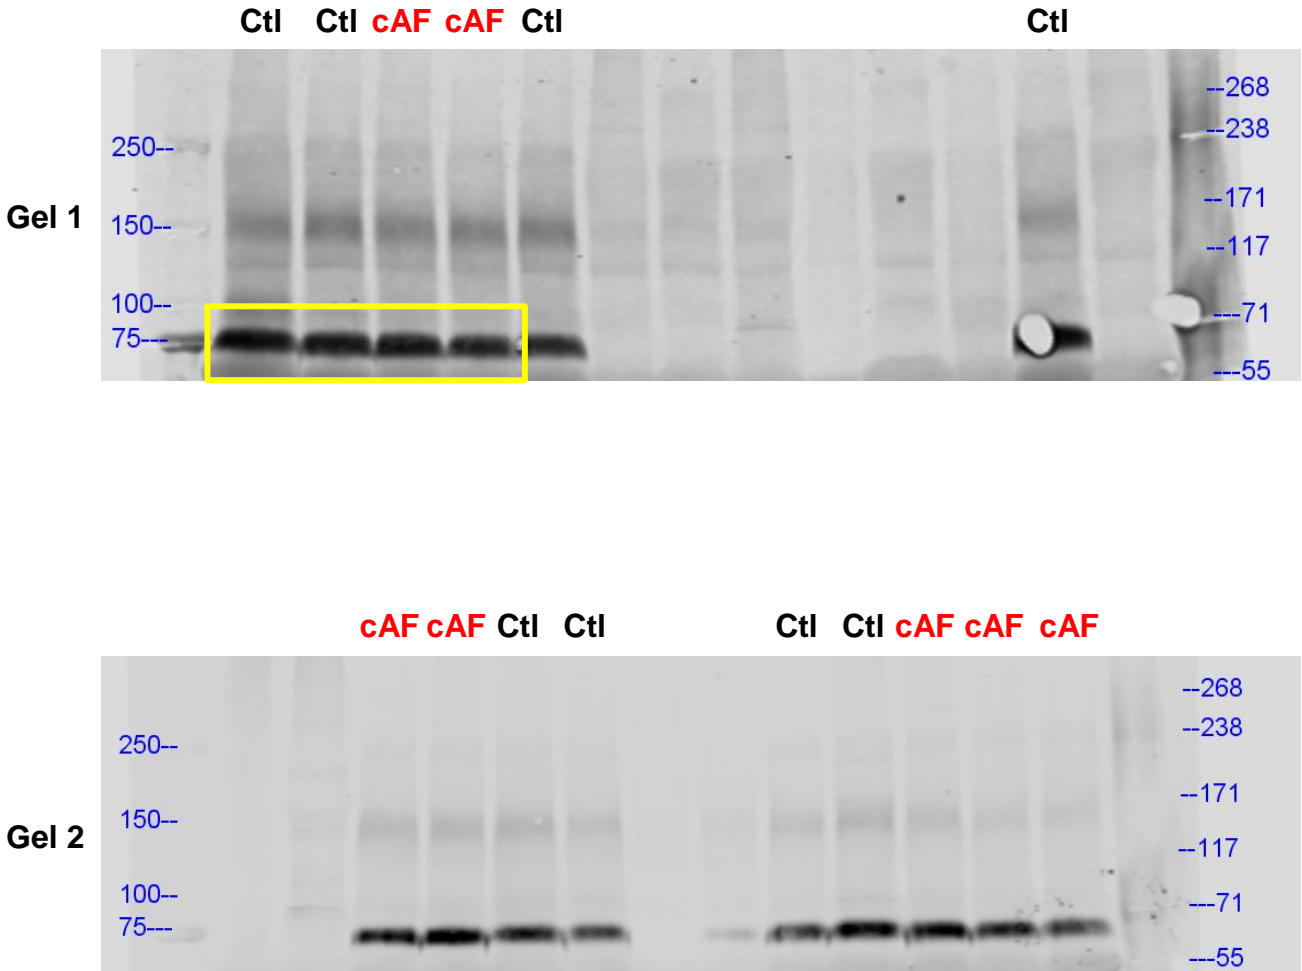

**Figure 2 – Protein levels in RA cardiomyocytes**

# SK2

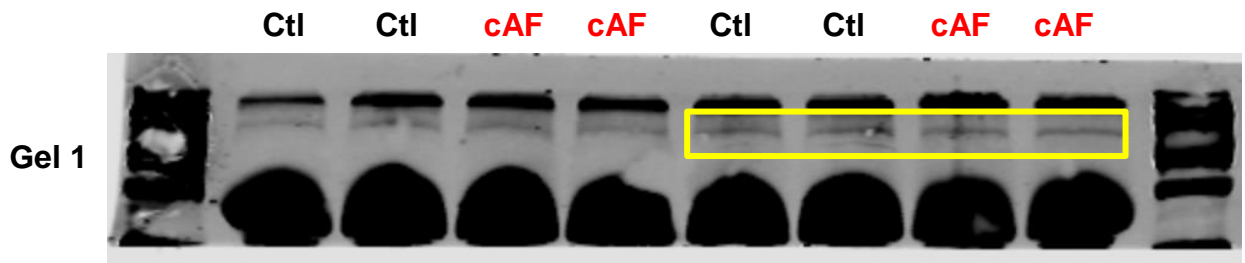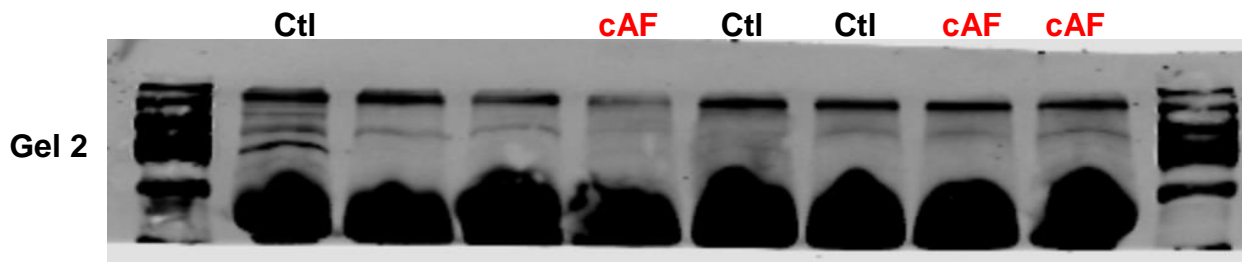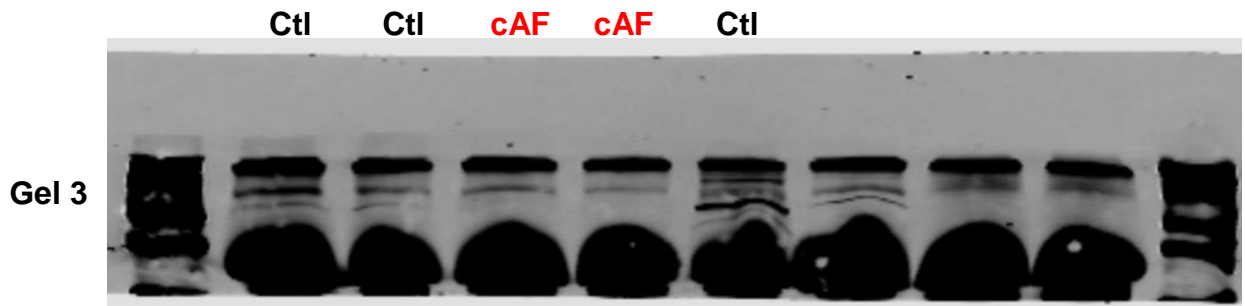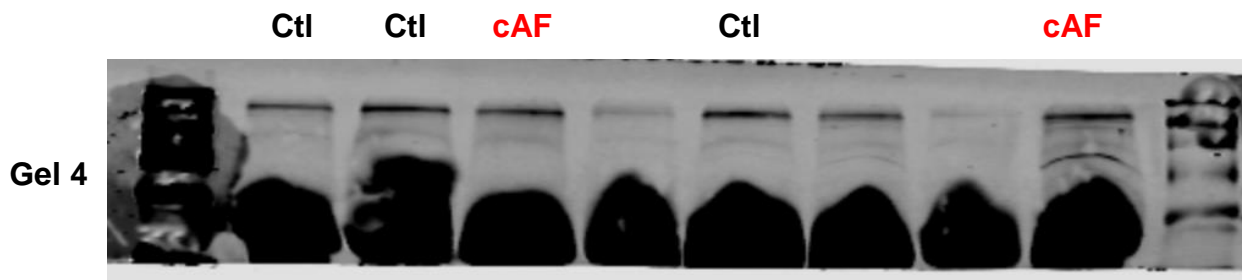

**Figure 2 – Protein levels in RA cardiomyocytes**

# SK3

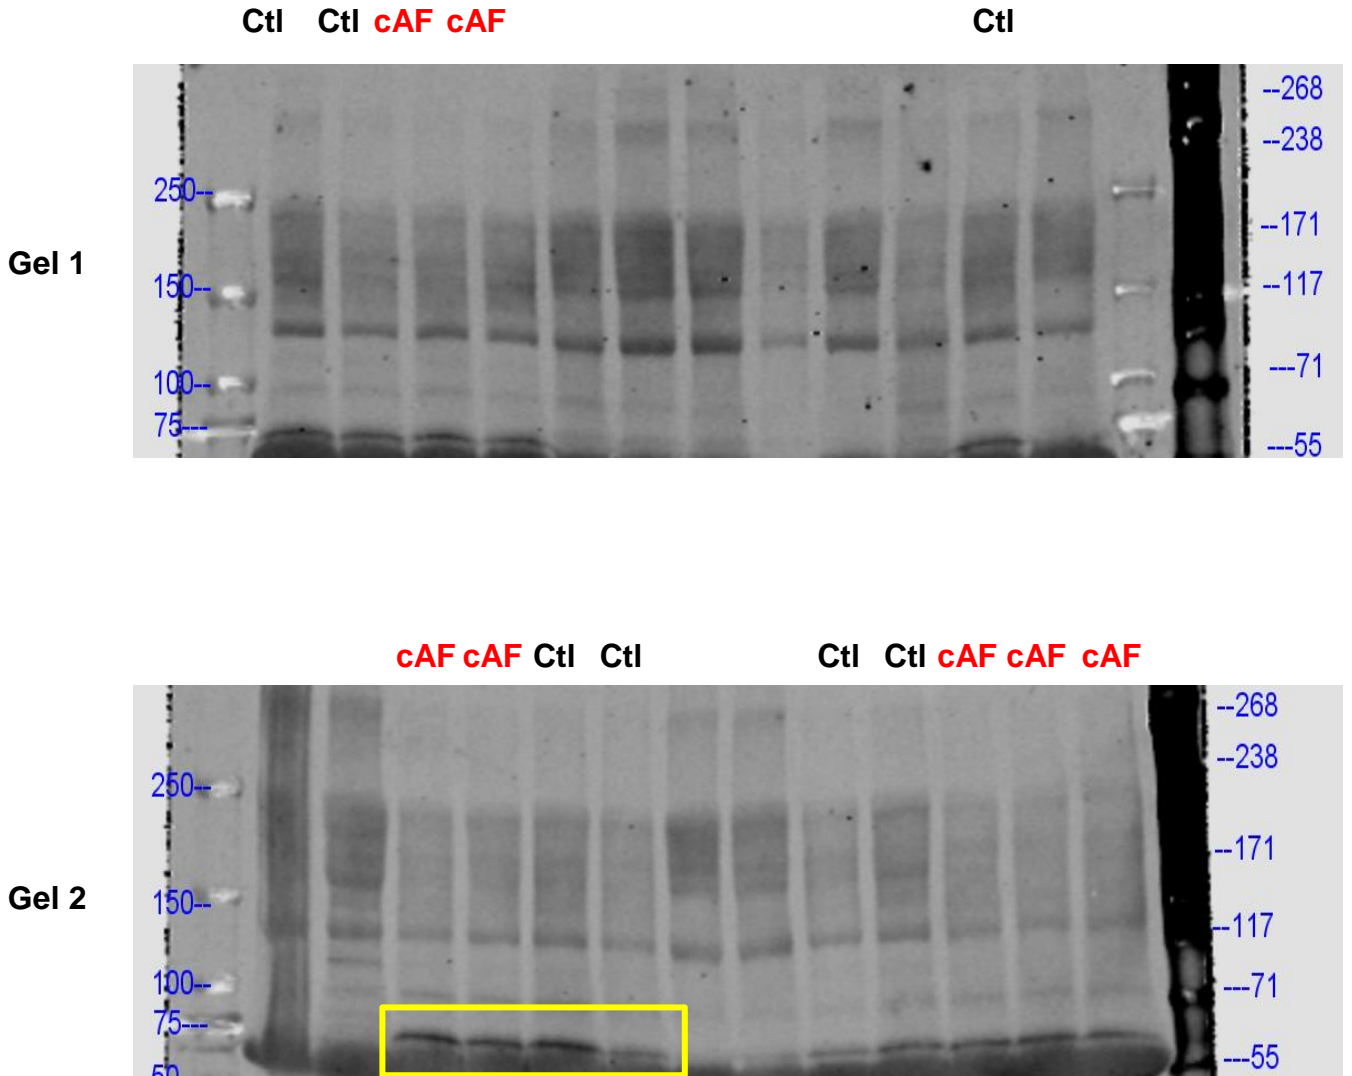

**Figure 2 – Protein levels in RA cardiomyocytes**

# PP2Ac

Ctl

cAF

Ctl

Ctl

cAF

cAF

Gel 1

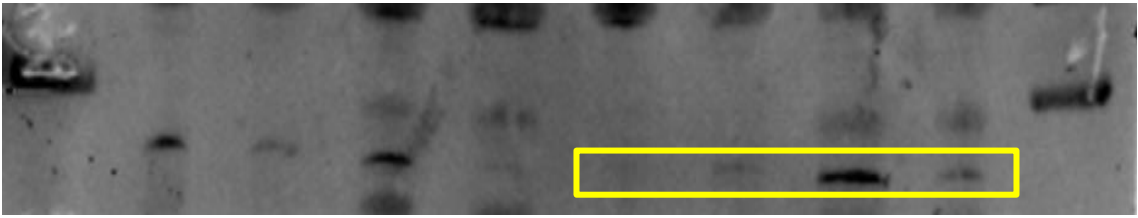

Ctl

cAF

cAF

Ctl

Ctl

cAF

cAF

Gel 2

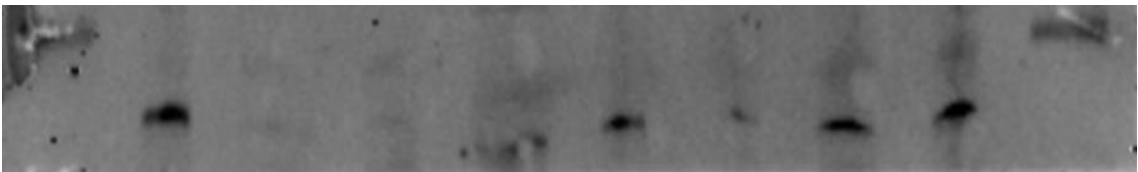

Ctl

Ctl

cAF

cAF

Ctl

cAF

cAF

Gel 3

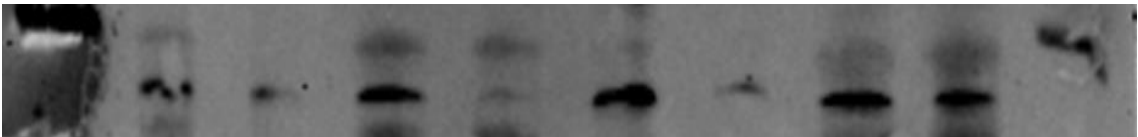

Ctl

cAF

cAF

Ctl

Ctl

cAF

cAF

Gel 4

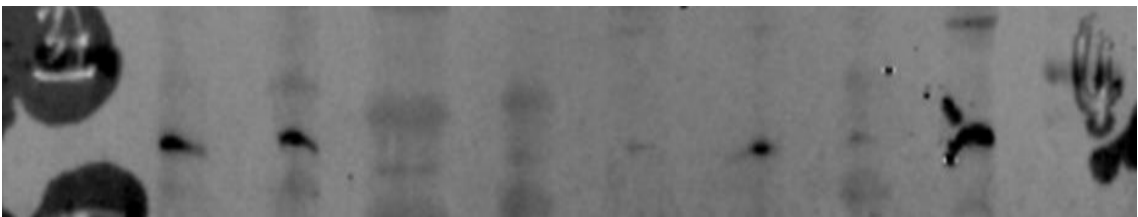

**Figure 6 – Protein levels in RA cardiomyocytes**

# Total-CaM

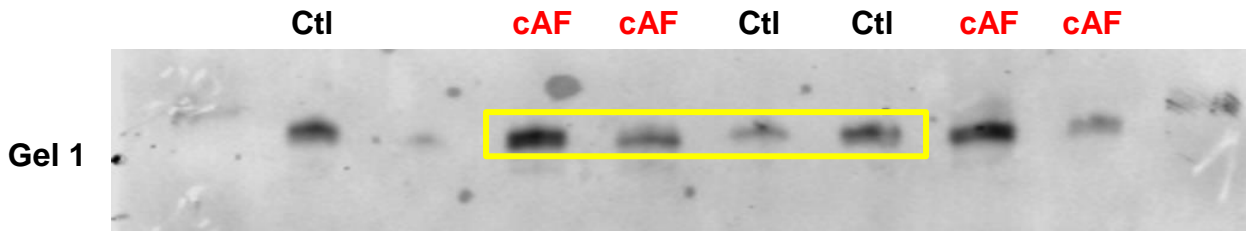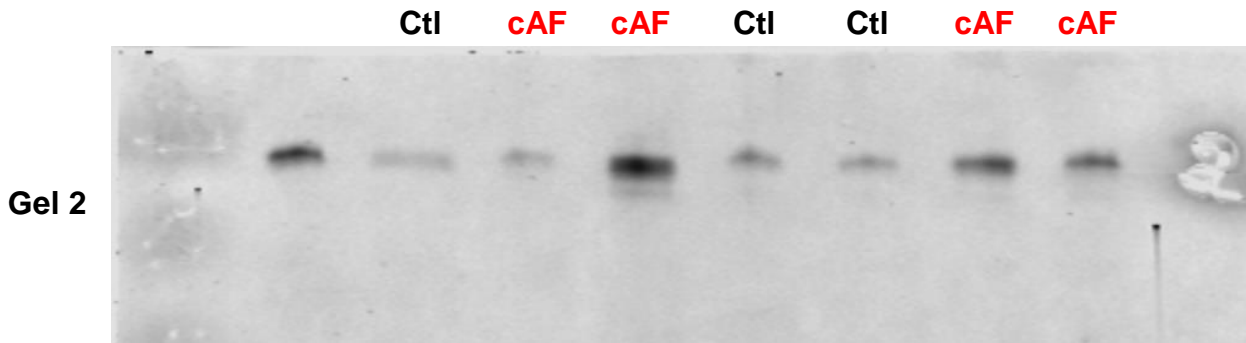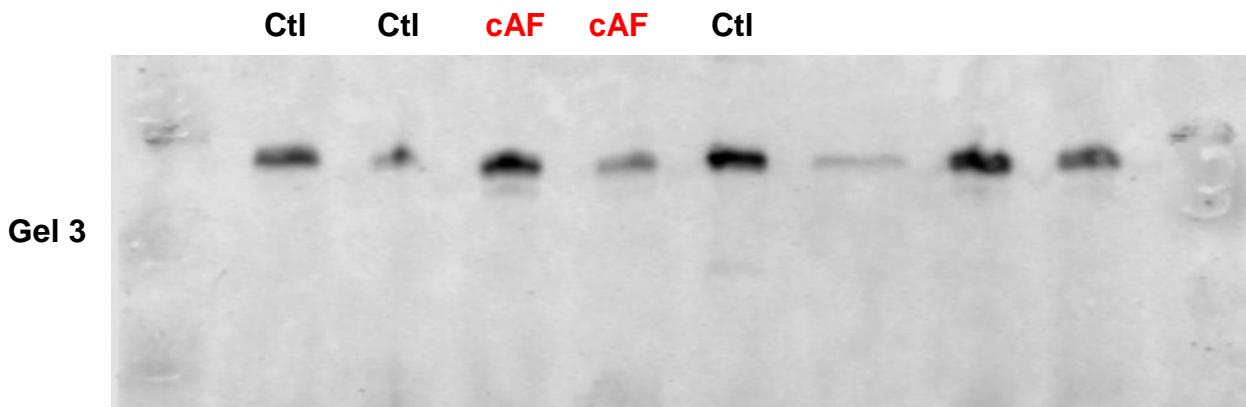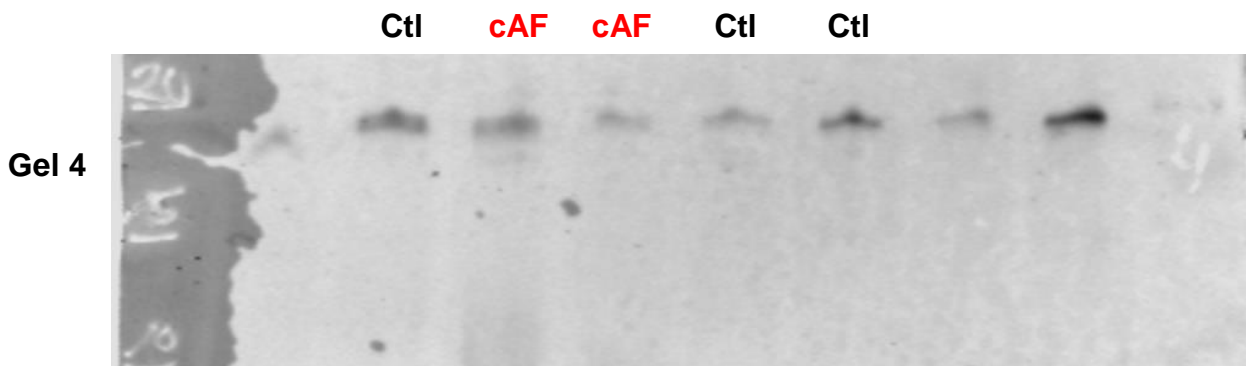

**Figure 6 – Protein levels in RA cardiomyocytes**

# Thr80-CaM

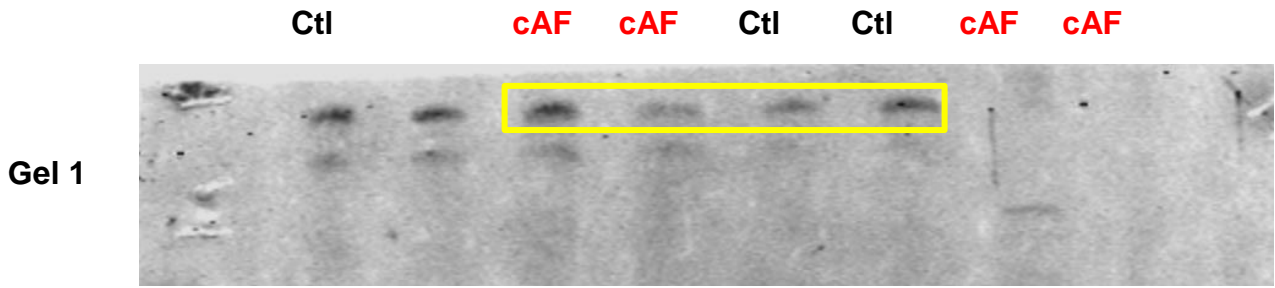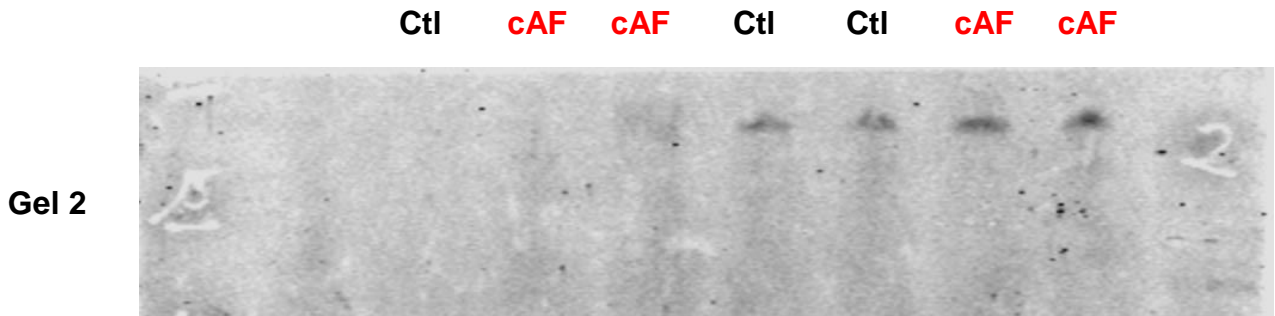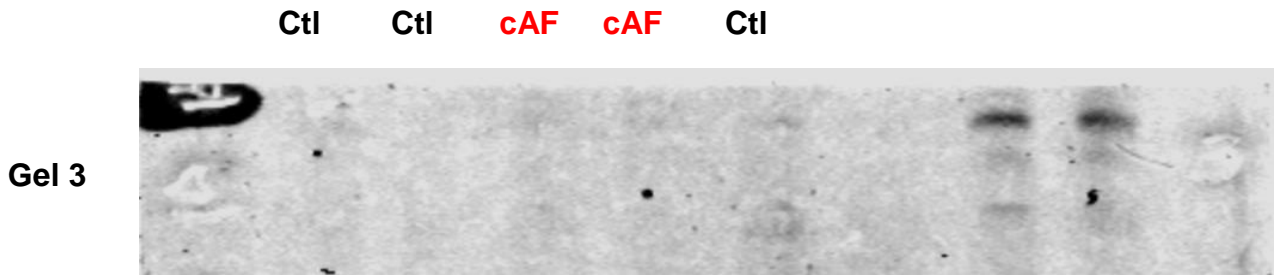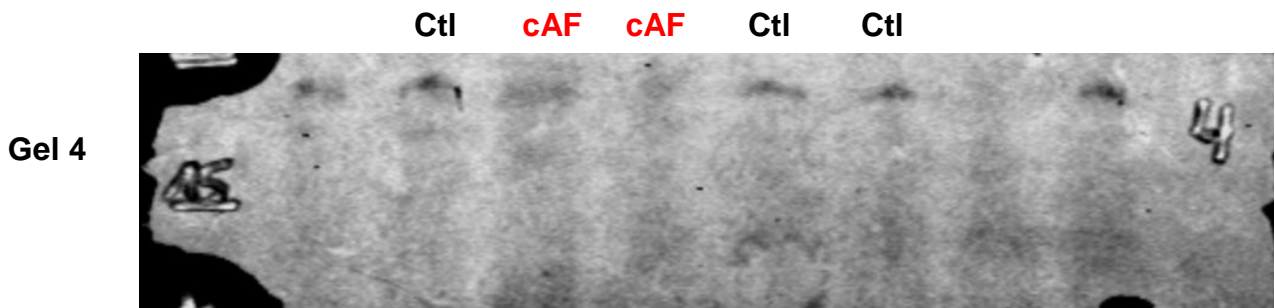

**Figure 6 – Protein levels in RA cardiomyocytes**

# Troponin C

Used for

|       |       |       |       |       |       |       |       |
|-------|-------|-------|-------|-------|-------|-------|-------|
| CaM   |
| PP2Ac |
| SK2   |
| Ctl   | Ctl   | cAF   | cAF   | Ctl   | Ctl   | cAF   | cAF   |

Gel 1

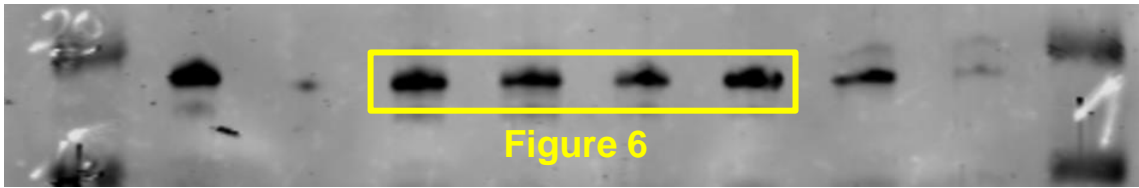

Used for

|       |       |       |       |       |       |       |       |
|-------|-------|-------|-------|-------|-------|-------|-------|
| CaM   |
| PP2Ac |
| SK2   |       | SK2   | SK2   | SK2   | SK2   | SK2   | SK2   |
| Ctl   | Ctl   | cAF   | cAF   | Ctl   | Ctl   | cAF   | cAF   |

Gel 2

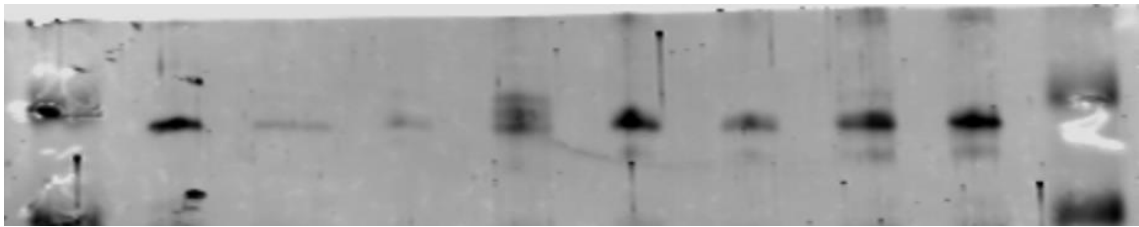

Used for

|       |       |       |       |       |       |       |       |
|-------|-------|-------|-------|-------|-------|-------|-------|
| CaM   |
| PP2Ac |
| SK2   | SK2   | SK2   | SK2   | SK2   |       |       |       |
| Ctl   | Ctl   | cAF   | cAF   | Ctl   |       | cAF   | cAF   |

Gel 3

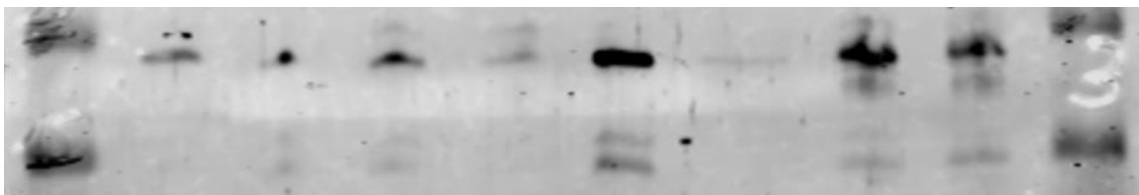

Used for

|       |       |       |       |       |       |       |       |
|-------|-------|-------|-------|-------|-------|-------|-------|
| CaM   |
| PP2Ac |
| SK2   | SK2   | SK2   |       | SK2   |       |       | SK2   |
| Ctl   | Ctl   | cAF   | cAF   | Ctl   | Ctl   | cAF   | cAF   |

Gel 4

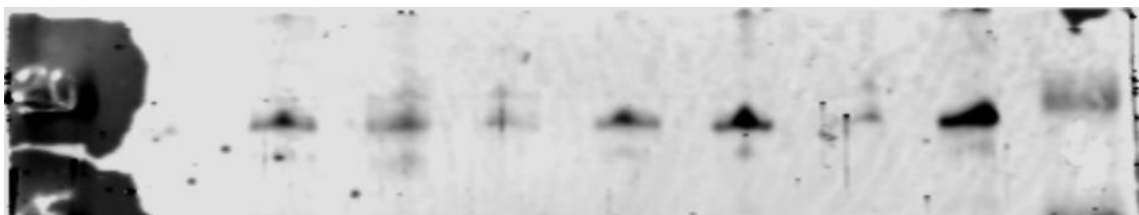

**Figure 2 + 6 – Protein levels in RA cardiomyocytes**



# Troponin C

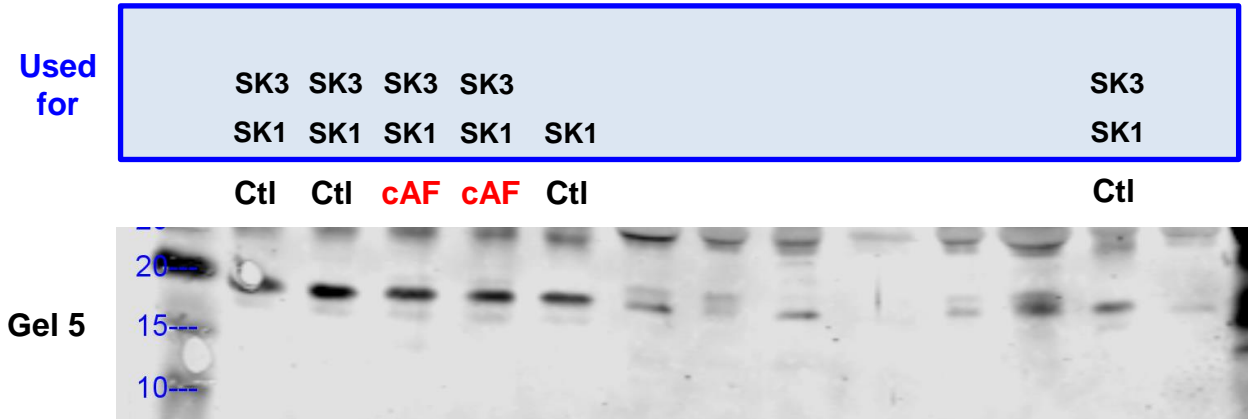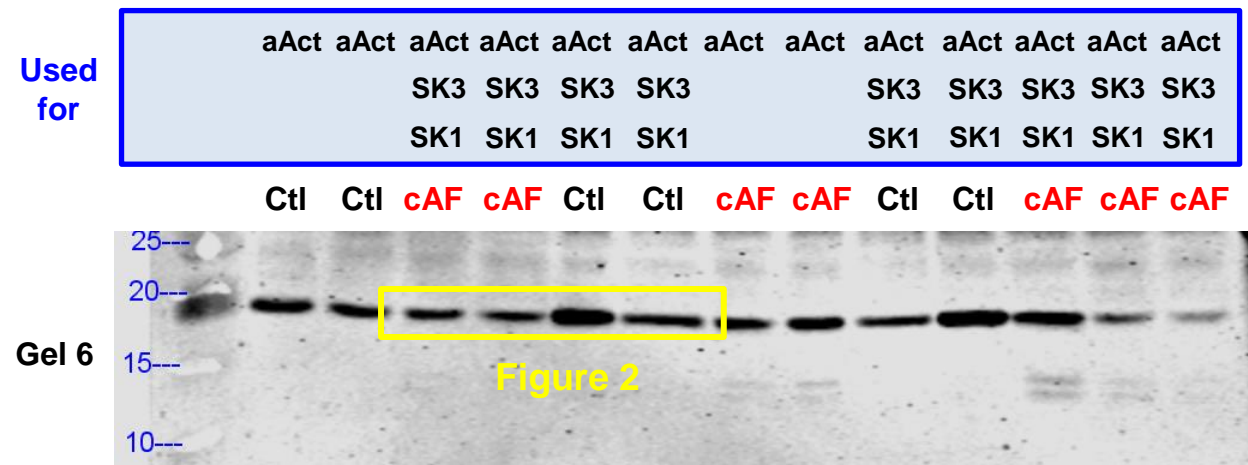

**Figure 2 + Online Figure XXIII – Protein levels in RA CMs**

# SK2

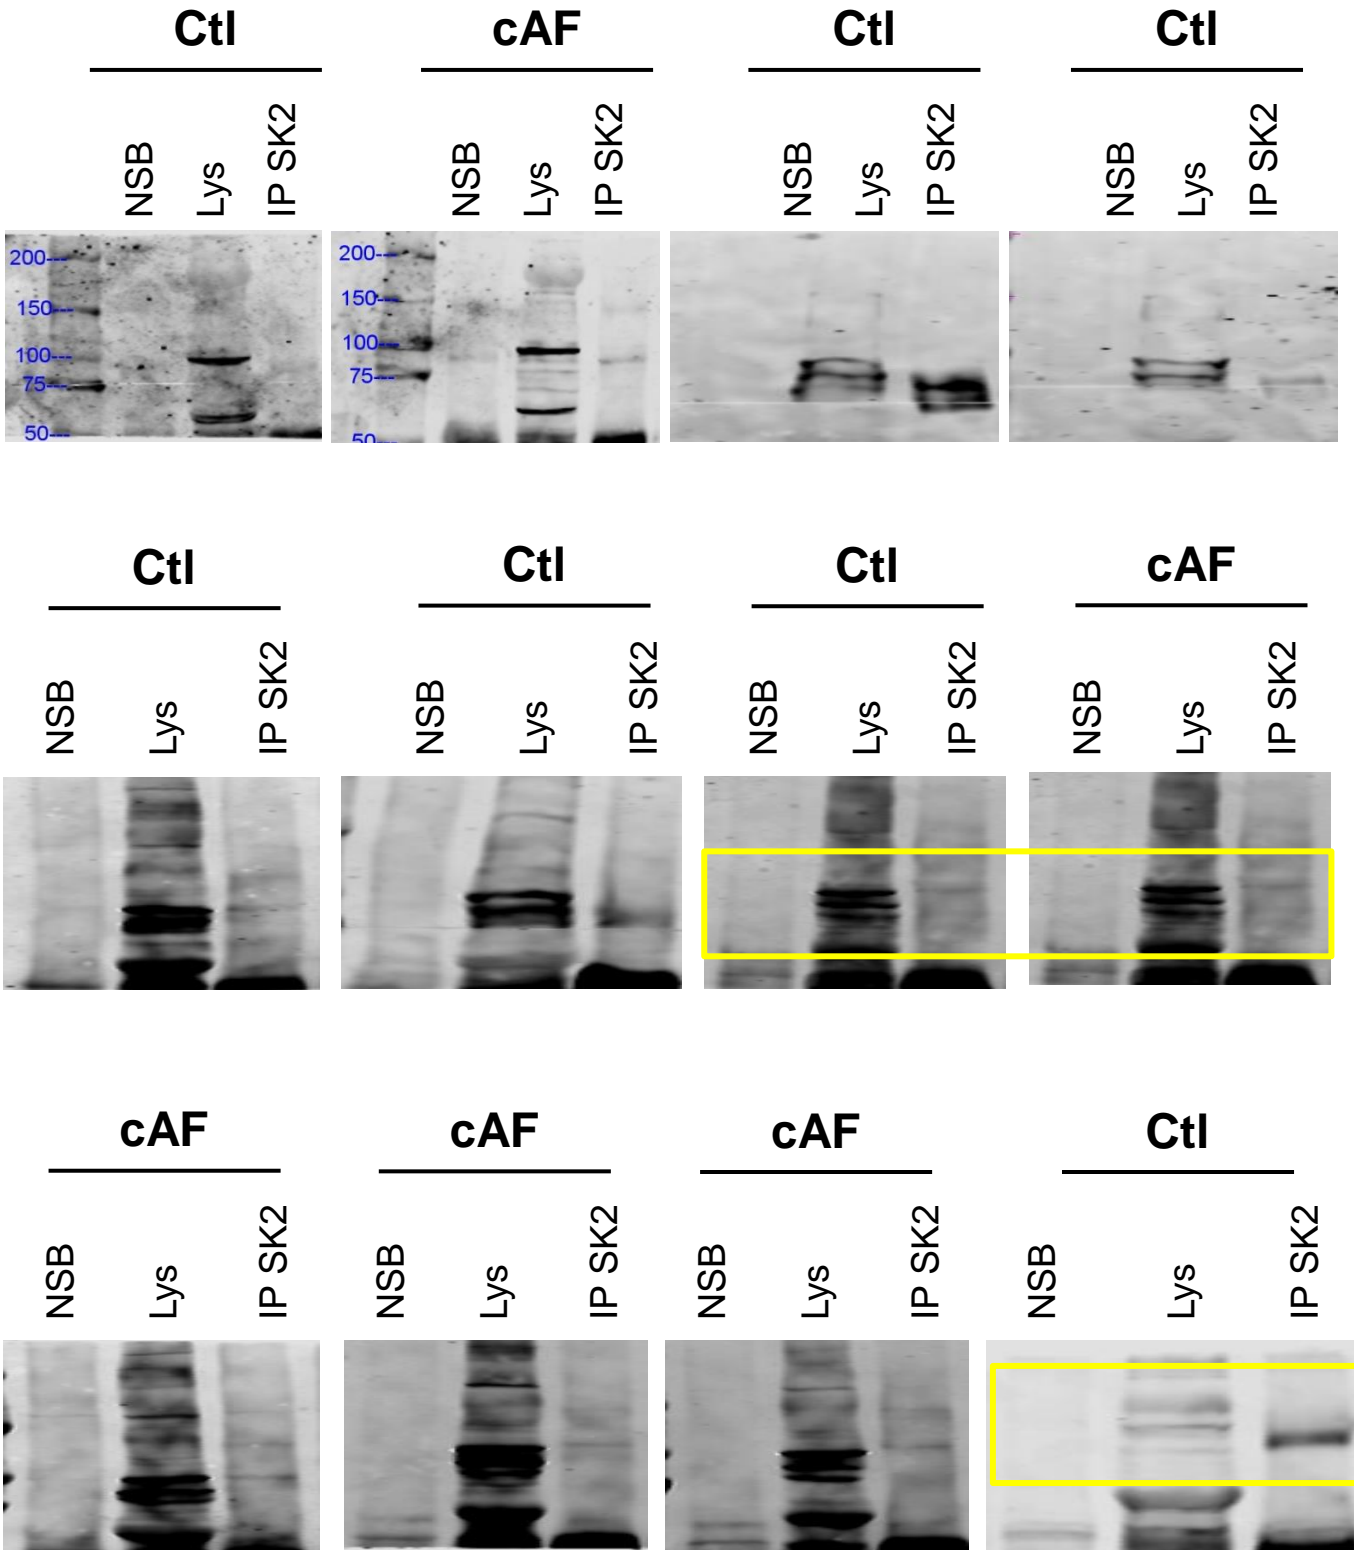

**Figure 6 - colPs**

# SK2

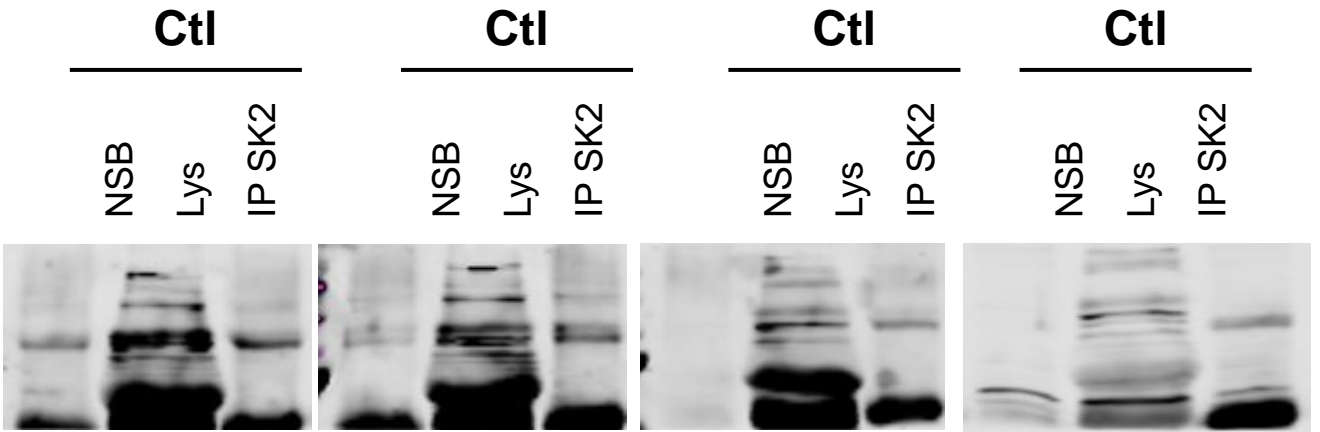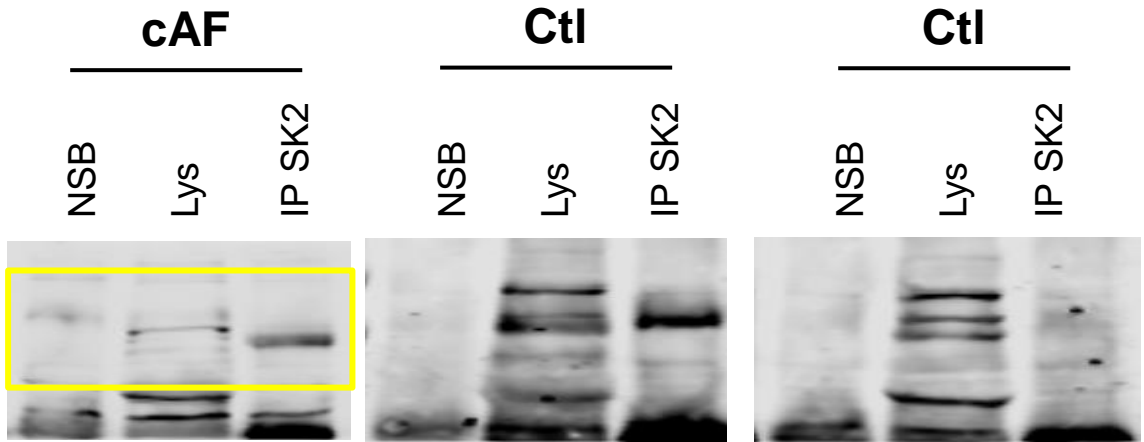

Figure 6 - colPs

# $\alpha$ -Act2

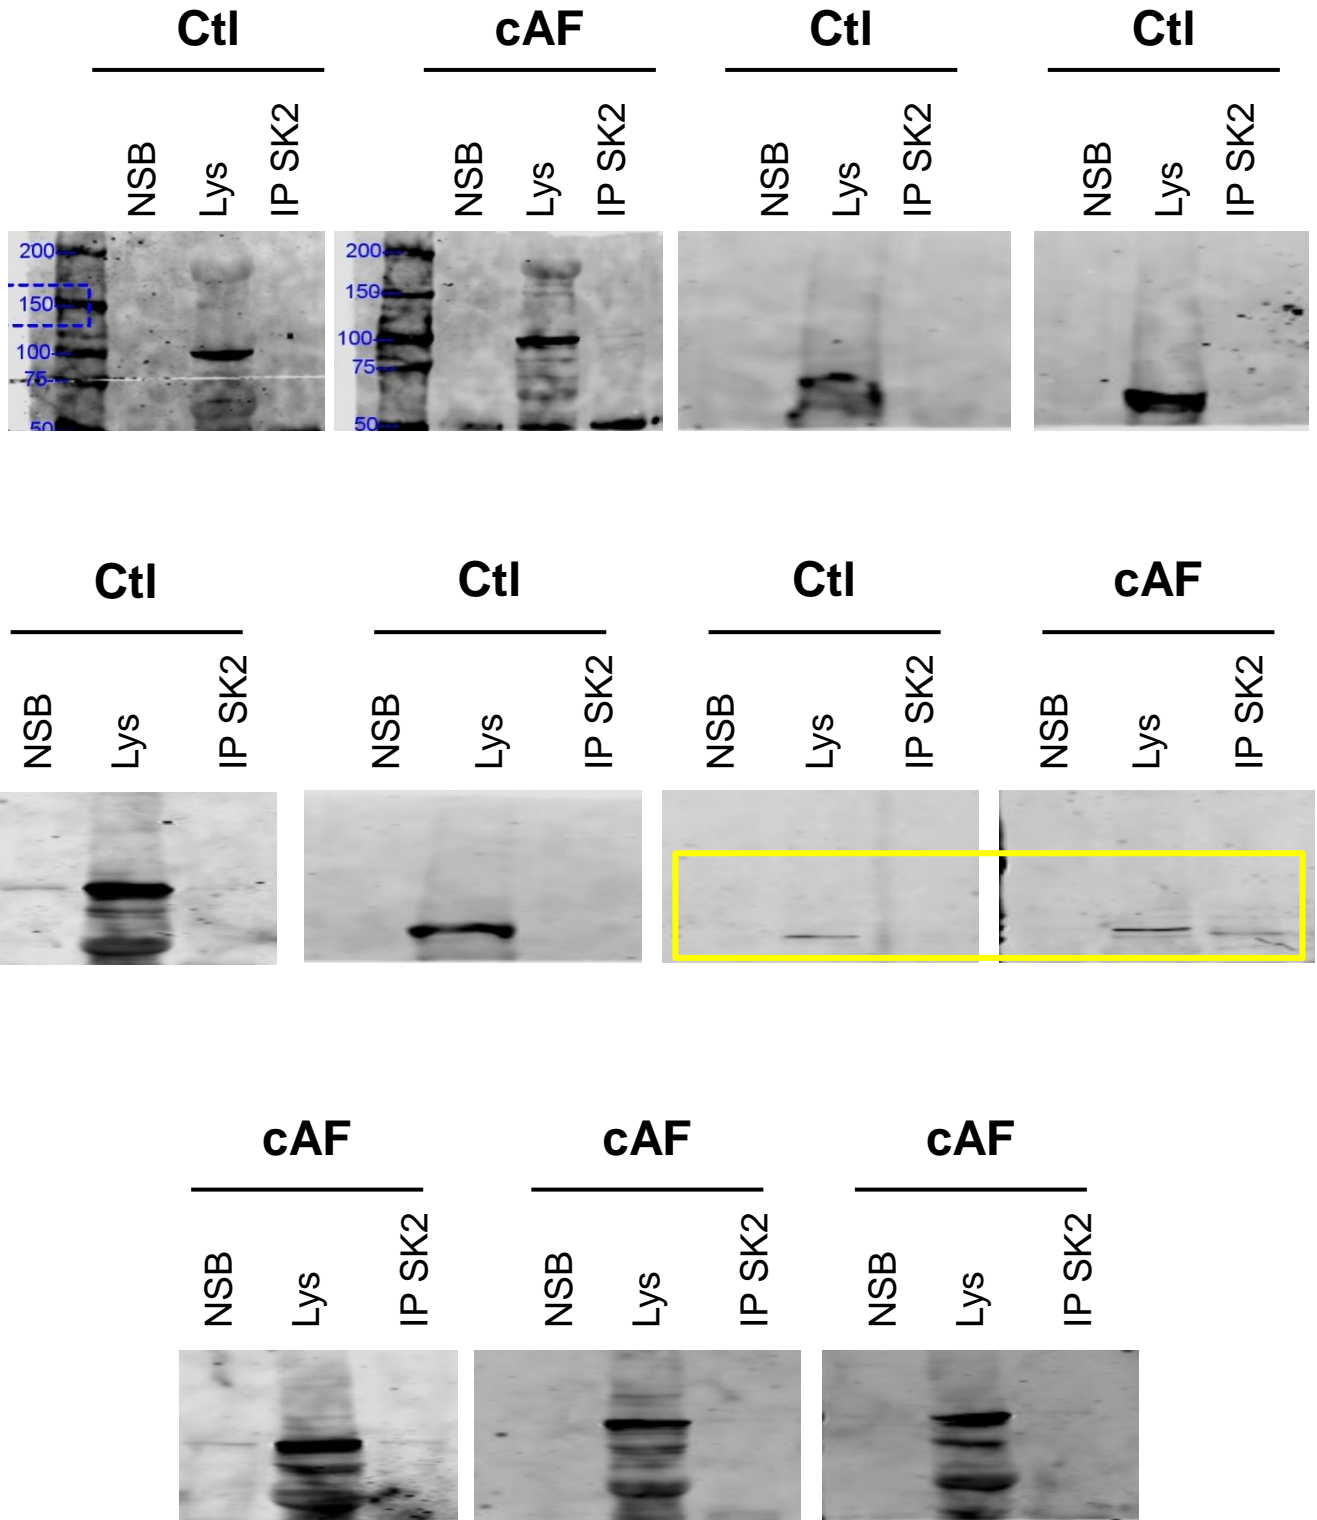

**Figure 6 - colPs**

# PP2Ac

Ctl

NSB

Lys

IP SK2

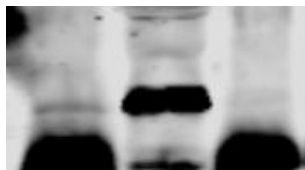

Ctl

NSB

Lys

IP SK2

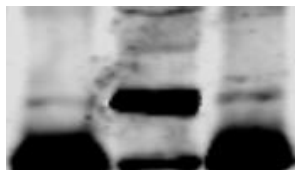

Ctl

NSB

Lys

IP SK2

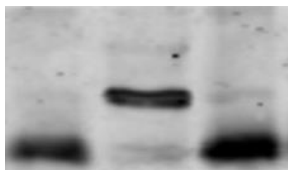

Ctl

NSB

Lys

IP SK2

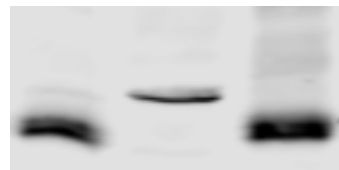

Ctl

NSB

Lys

IP SK2

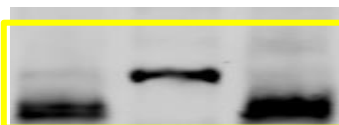

cAF

NSB

Lys

IP SK2

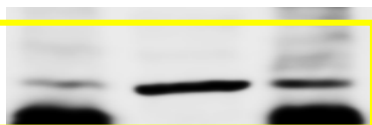

Ctl

NSB

Lys

IP SK2

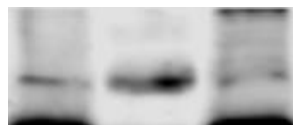

cAF

NSB

Lys

IP SK2

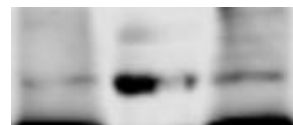

Ctl

NSB

Lys

IP SK2

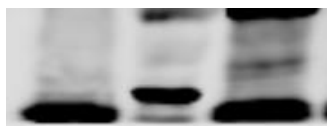

cAF

NSB

Lys

IP SK2

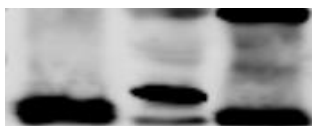

cAF

NSB

Lys

IP SK2

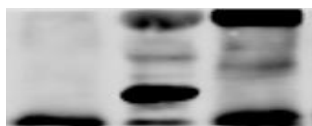

cAF

NSB

Lys

IP SK2

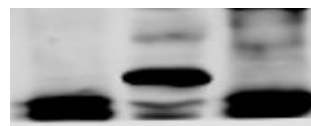

Figure 6 - colPs

# PP2Ac

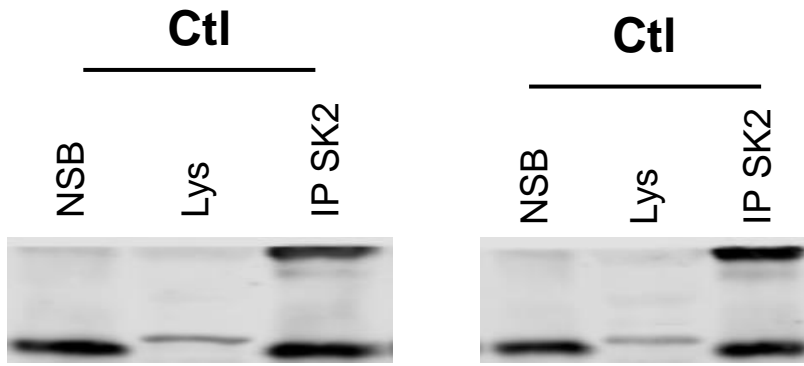

Figure 6 – colIPs

# SK4

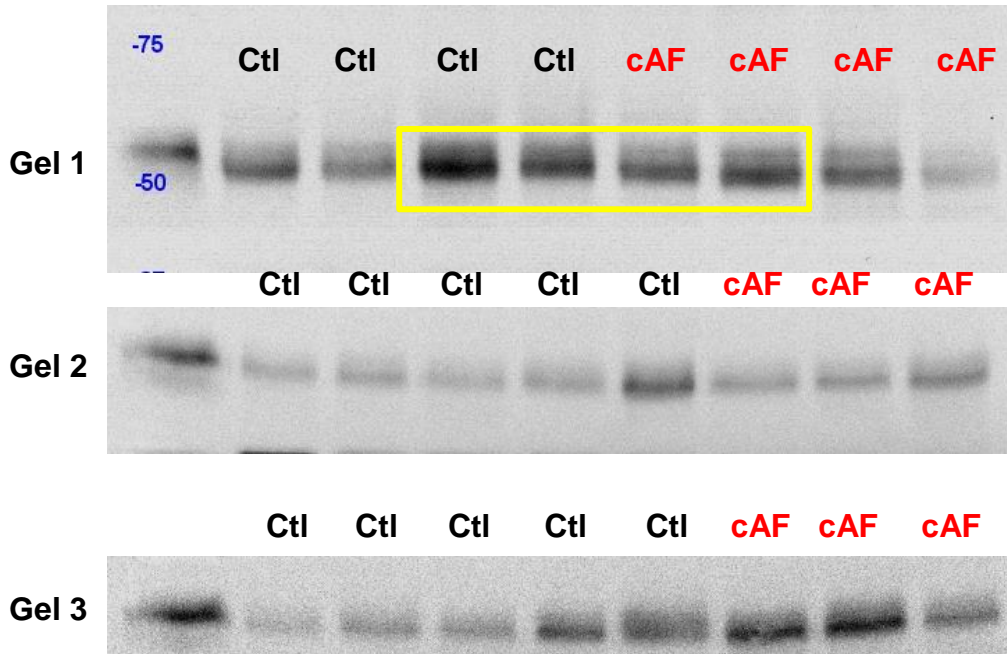

# GAPDH

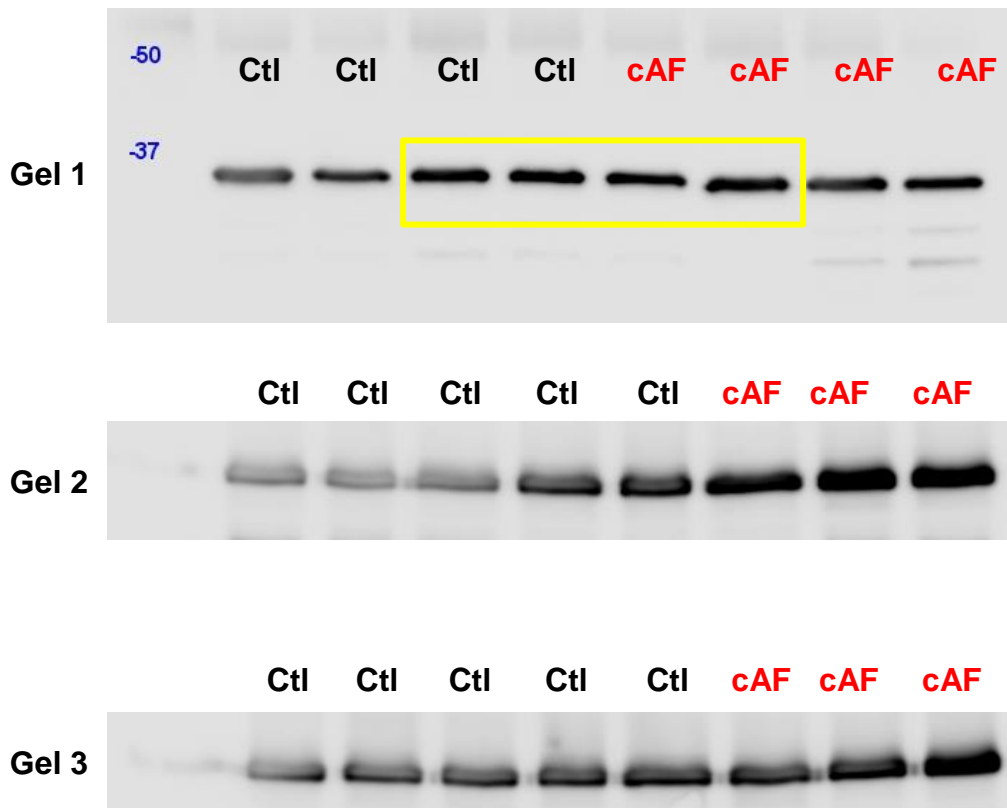

# BKCa

Gel 1

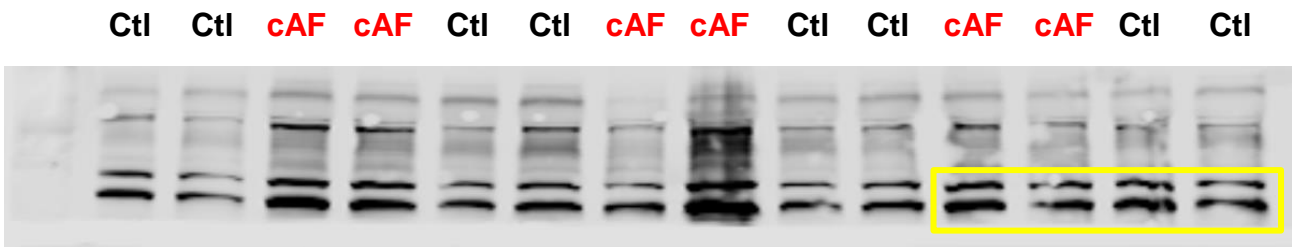

Gel 2

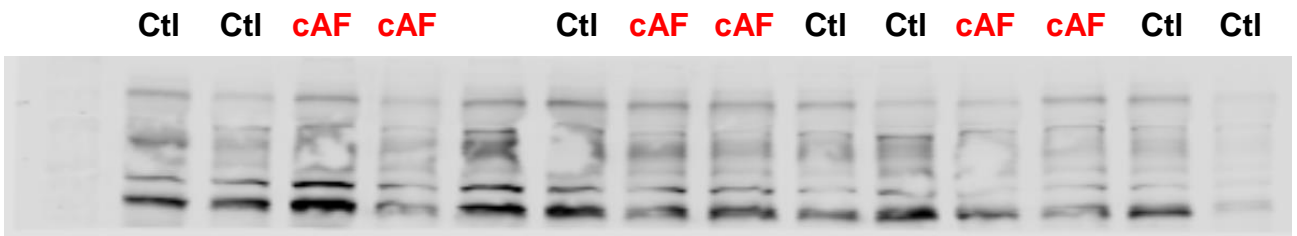

Gel 3

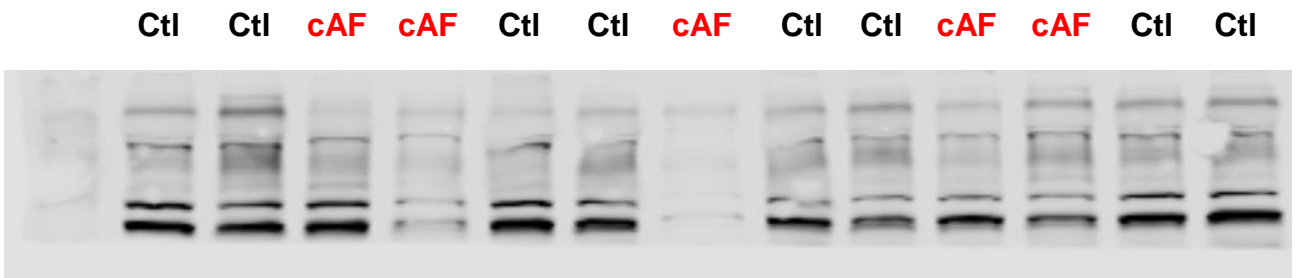



# GAPDH

Gel 1

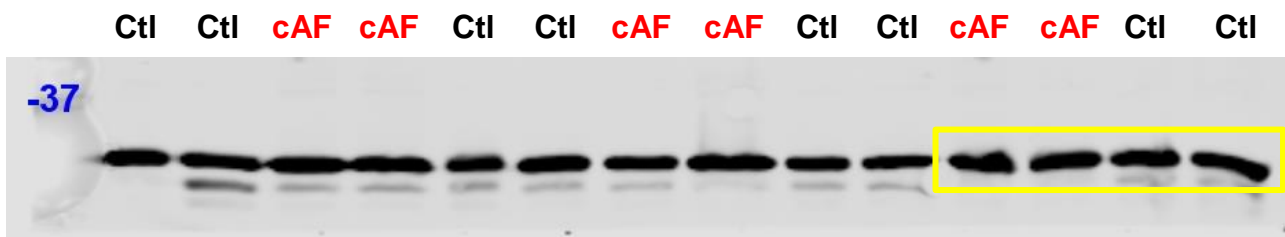

Gel 2

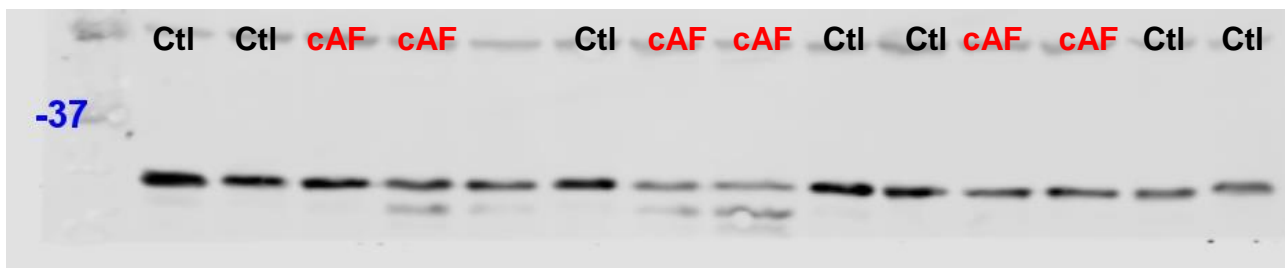

Gel 3

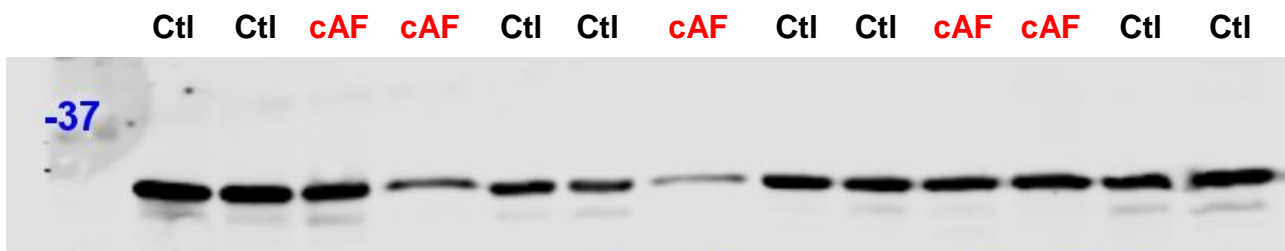

## SK2 antibody + blocking peptide

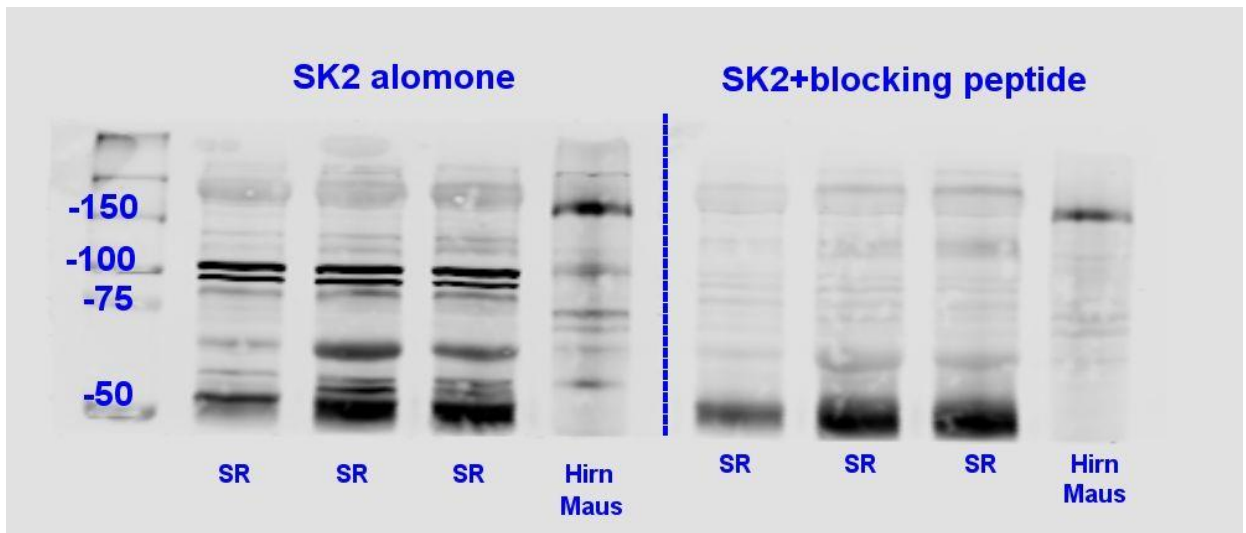

# SK1

Gel 1

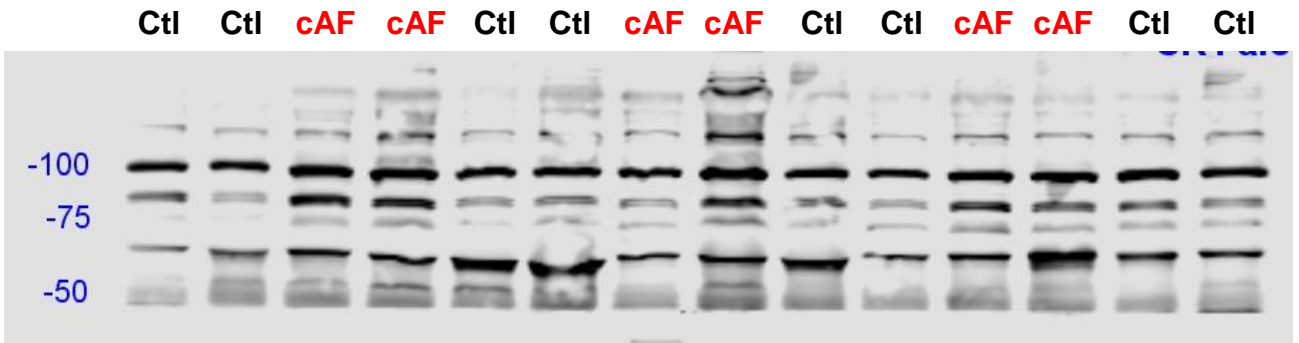

Gel 2

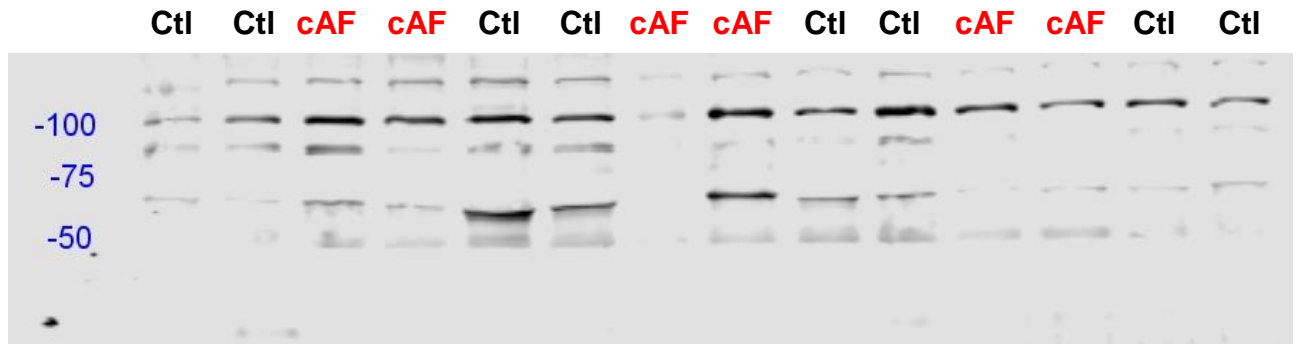

Gel 3

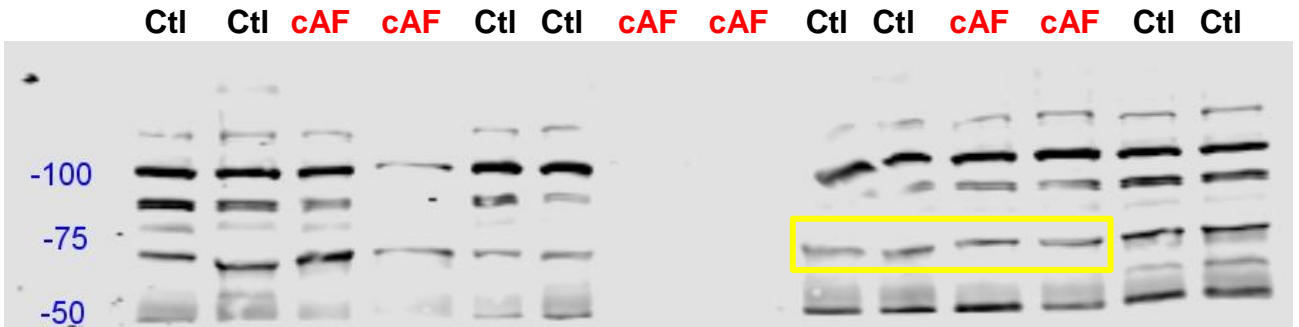

Online Figure XIII – Protein levels in RA whole-tissue homogenates

# GAPDH

Gel 1

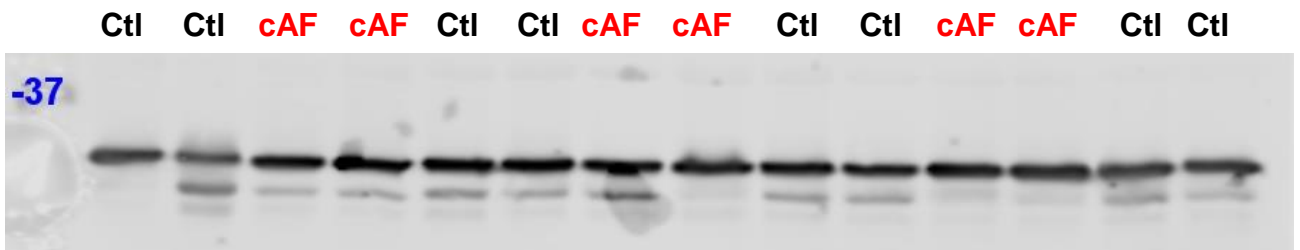

Gel 2

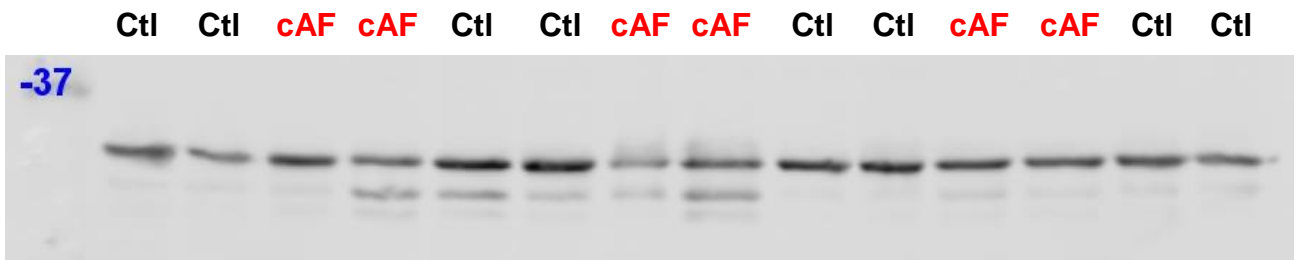

Gel 3

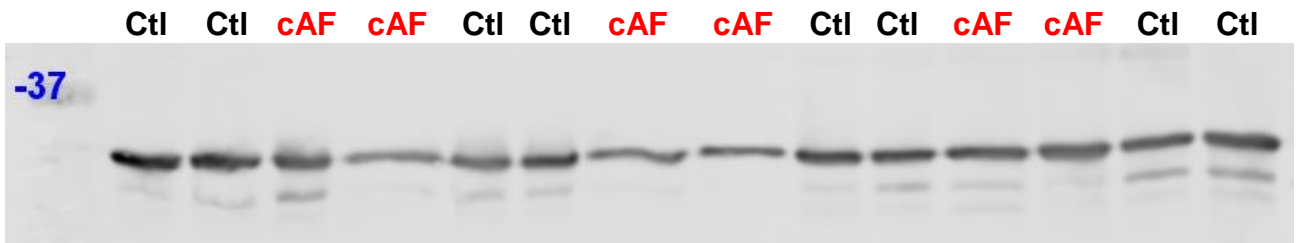

# SK2

Gel 1

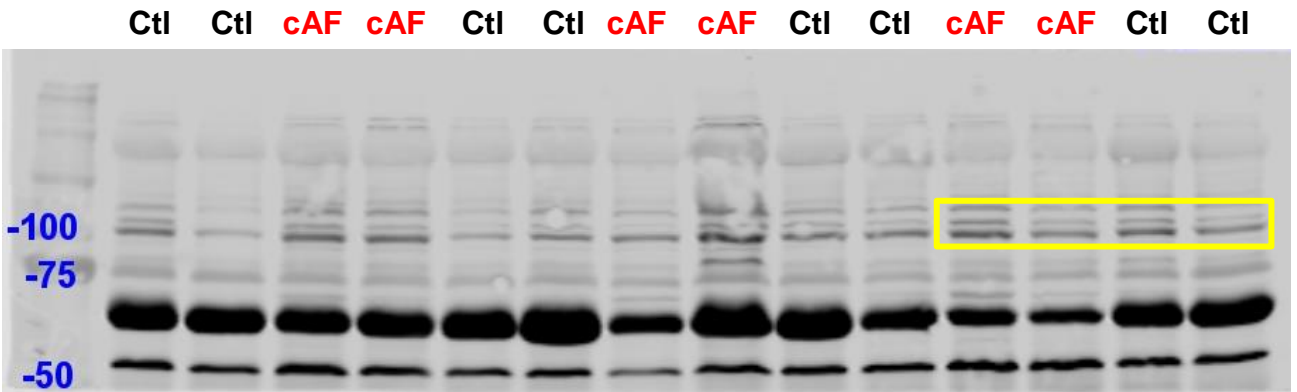

Gel 2

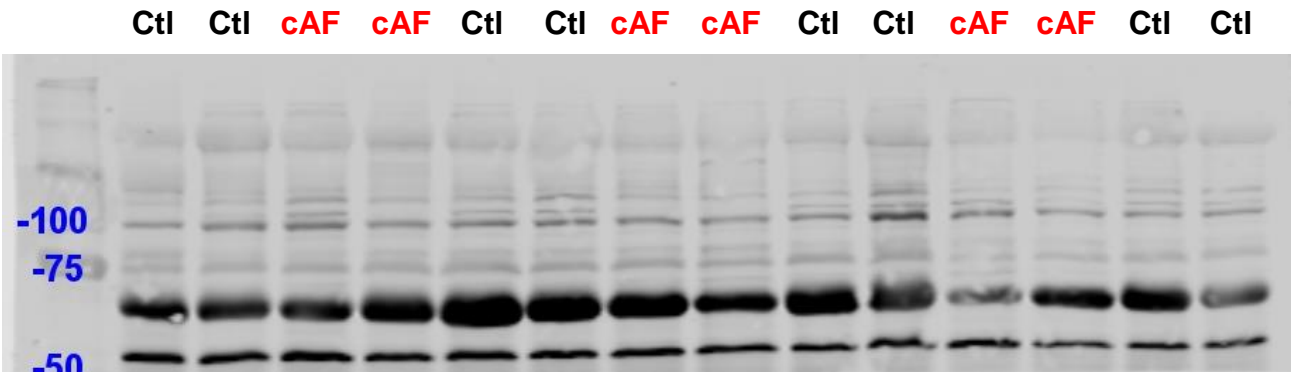

Gel 3

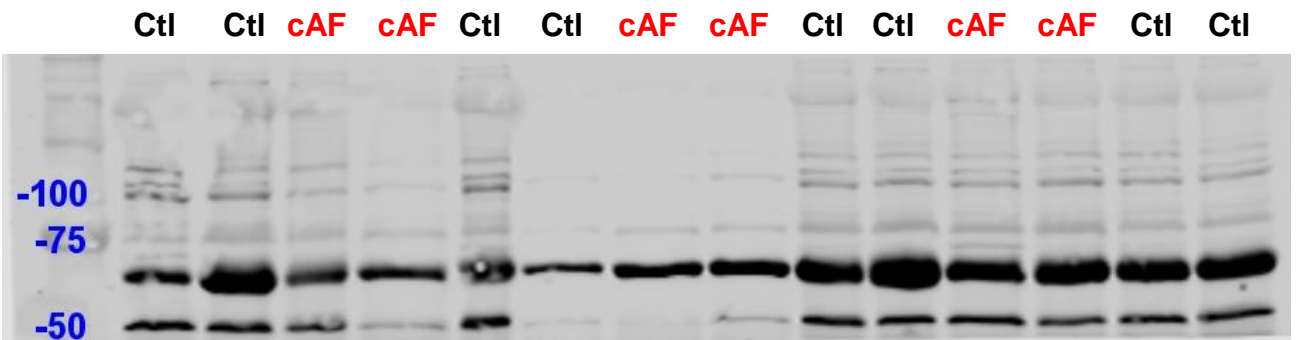

# GAPDH

Gel 1

Ctl Ctl cAF cAF Ctl Ctl cAF cAF Ctl Ctl cAF cAF Ctl Ctl

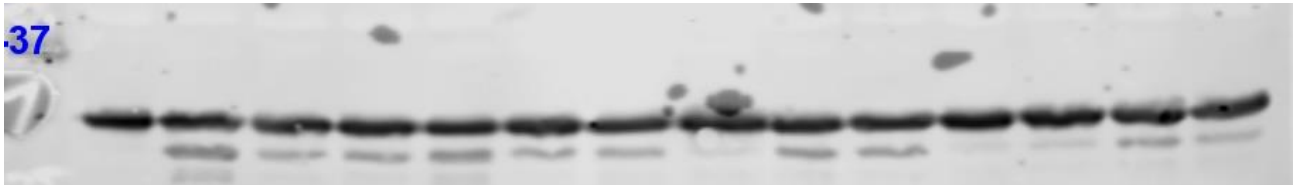

Gel 2

Ctl Ctl cAF cAF Ctl Ctl cAF cAF Ctl Ctl cAF cAF Ctl Ctl

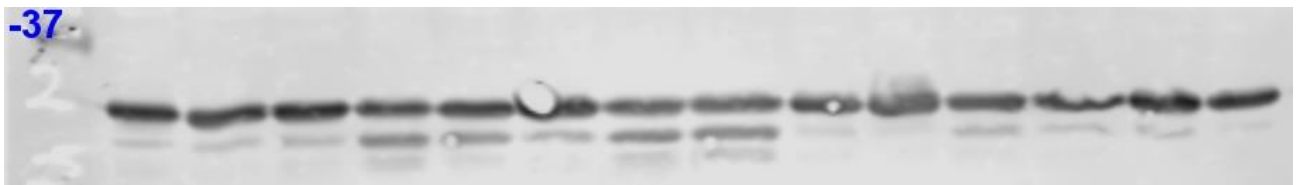

Gel 3

Ctl Ctl cAF cAF Ctl Ctl cAF cAF Ctl Ctl cAF cAF Ctl Ctl

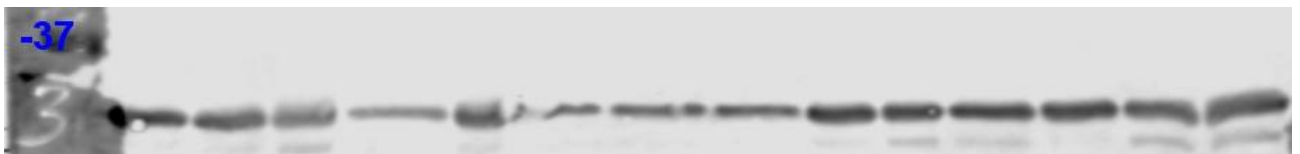

# SK3

Gel 1

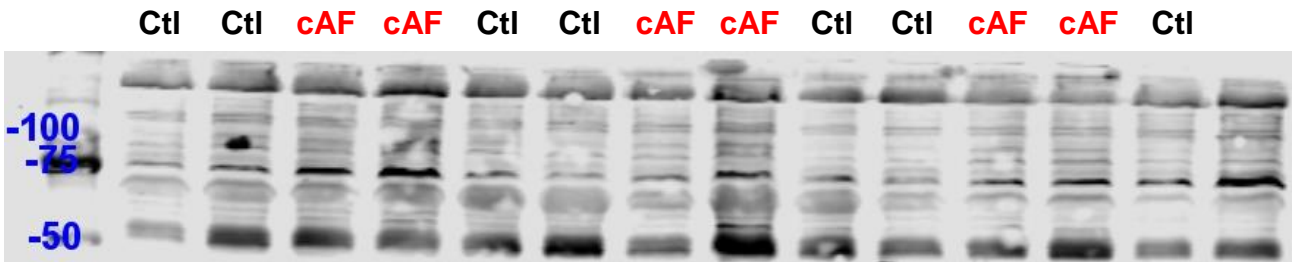

Gel 2

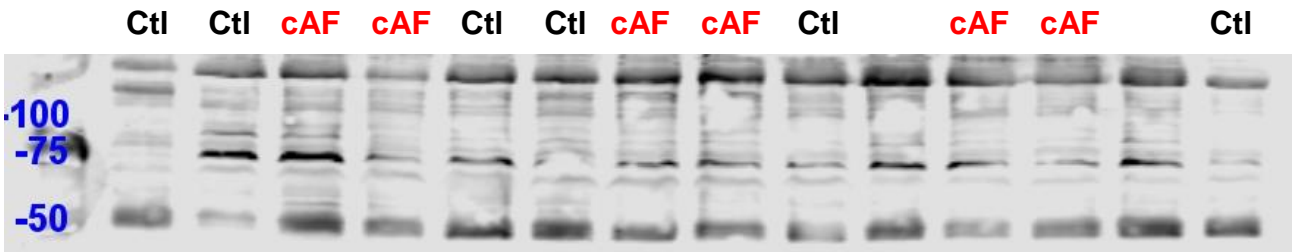

Gel 3

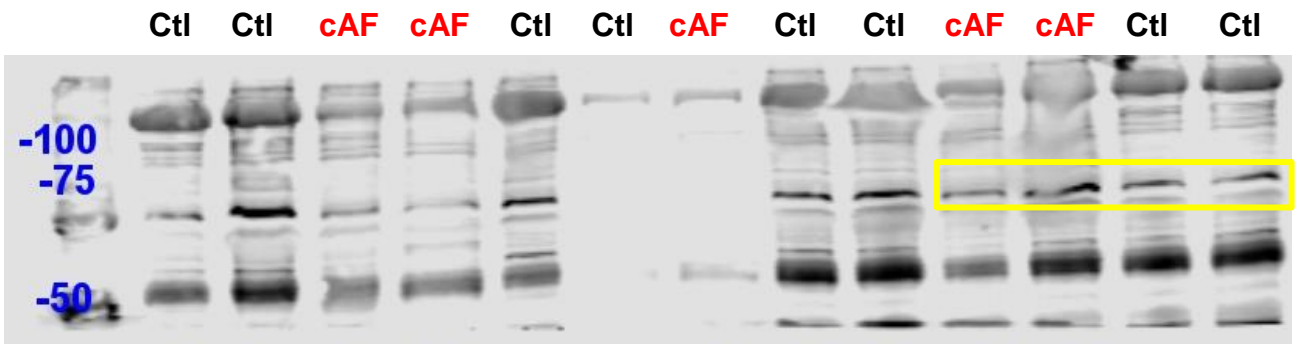

# GAPDH

Gel 1

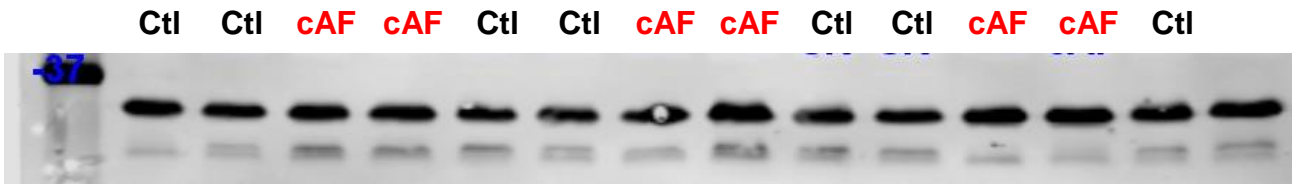

Gel 2

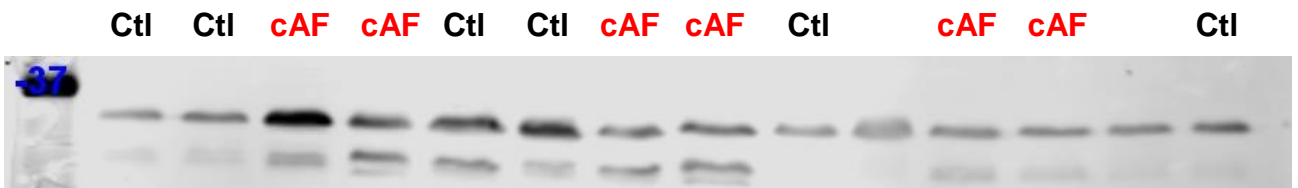

Gel 3

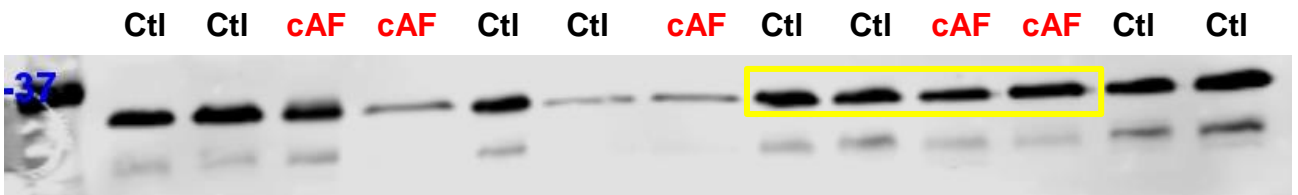



## SK1

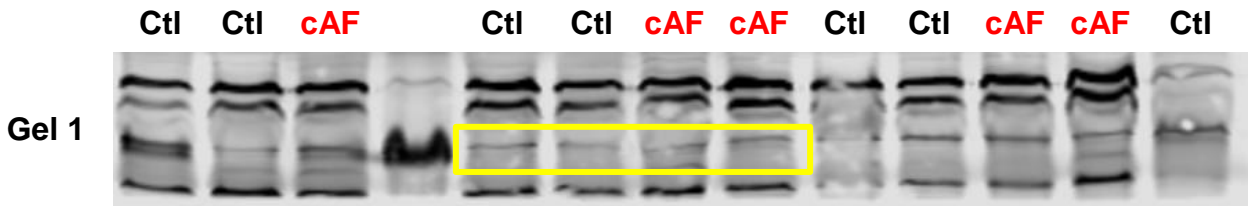

## SK2

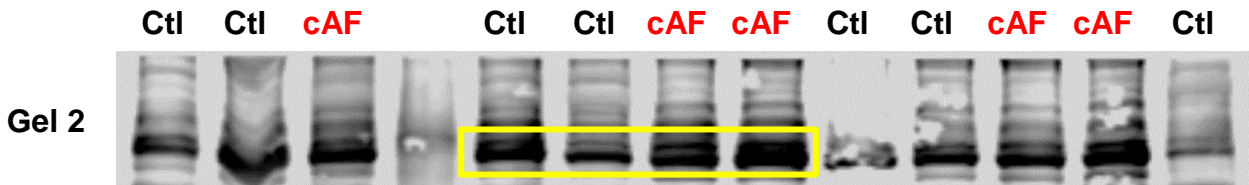

## SK3

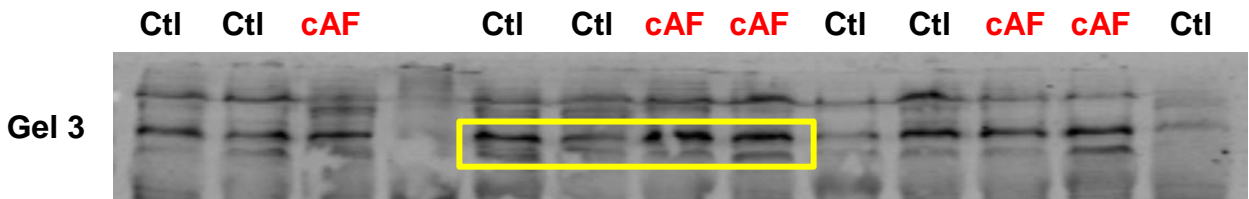

## GAPDH

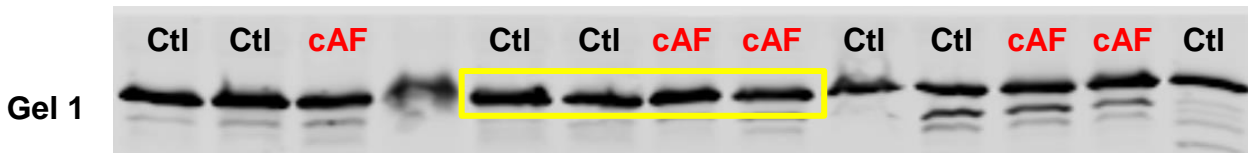

## GAPDH

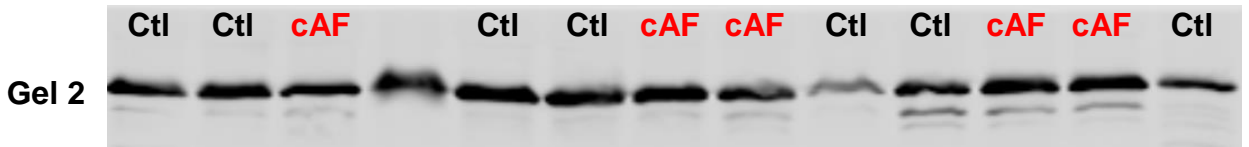

## GAPDH

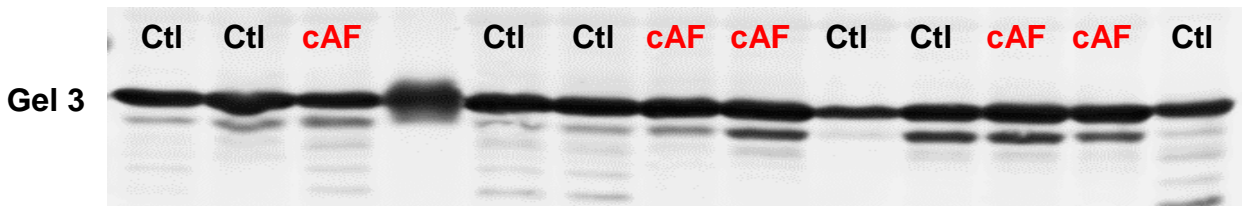

Online Figure XIII – Protein levels in LA whole-tissue homogenates

# Total-CaM

Gel 1

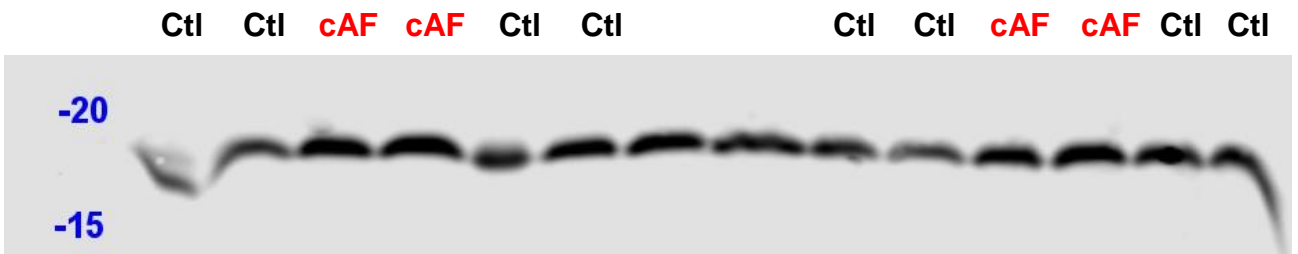

Gel 2

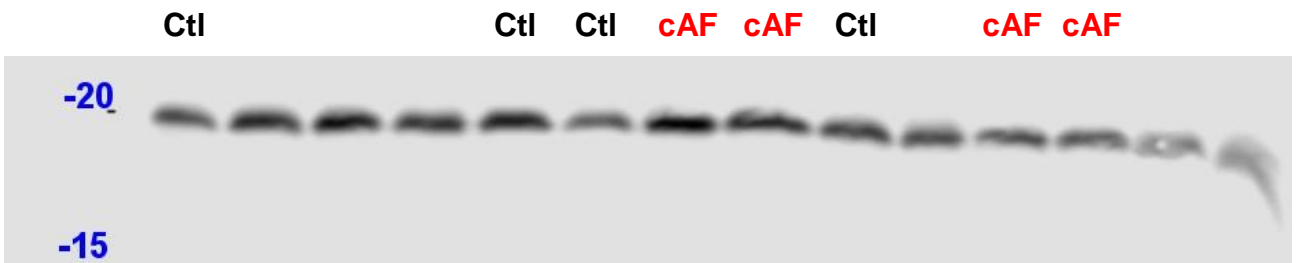

Gel 3

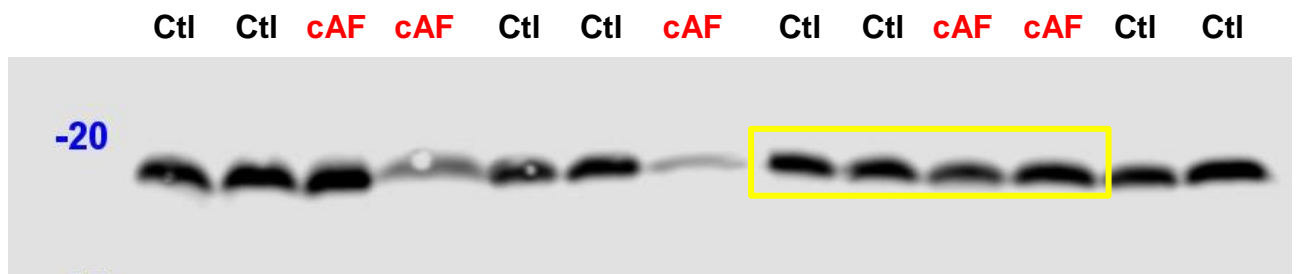

# Thr80-CaM

Gel 1

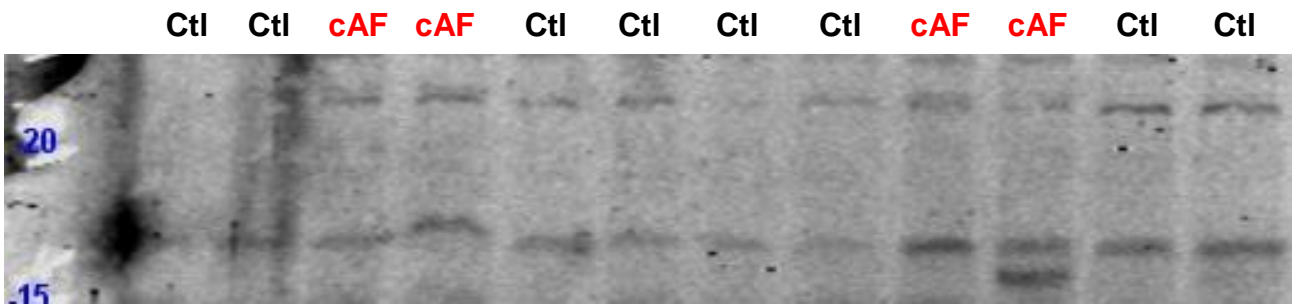

Gel 2

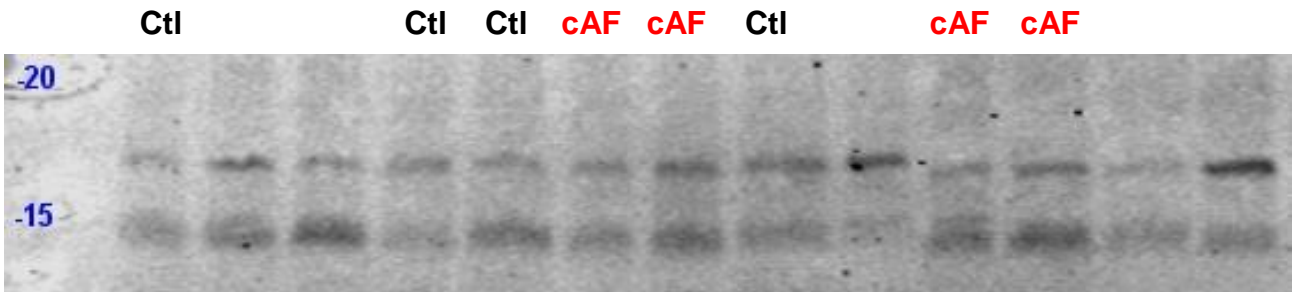

Gel 3

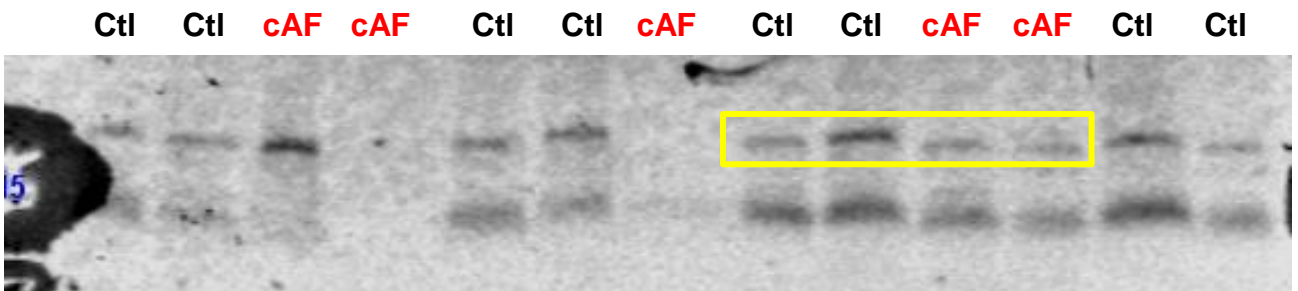

# GAPDH

Gel 1

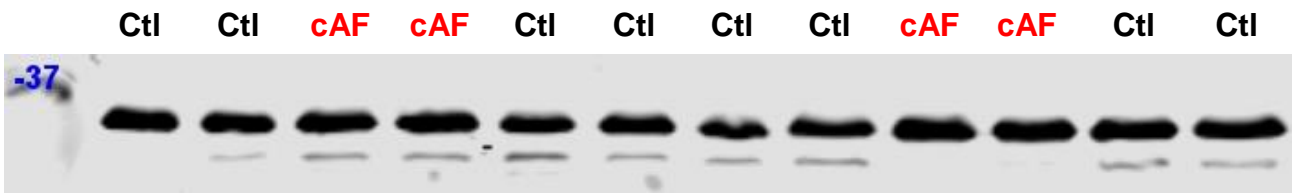

Gel 2

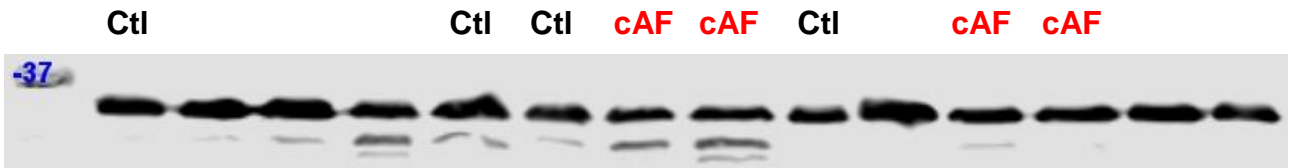

Gel 3

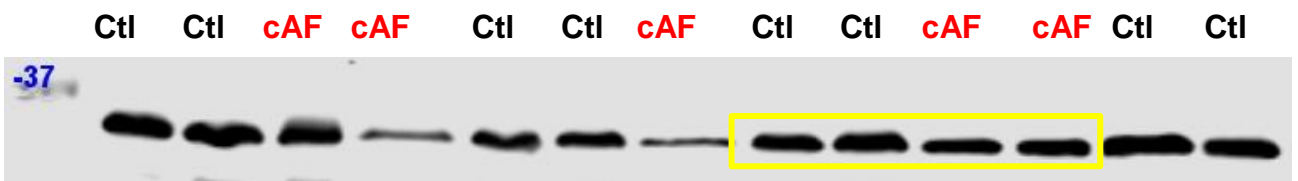

# CKII $\alpha$

Gel 1

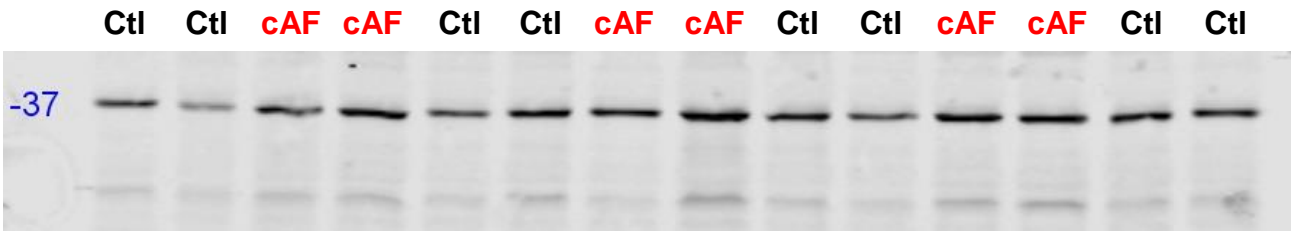

Gel 2

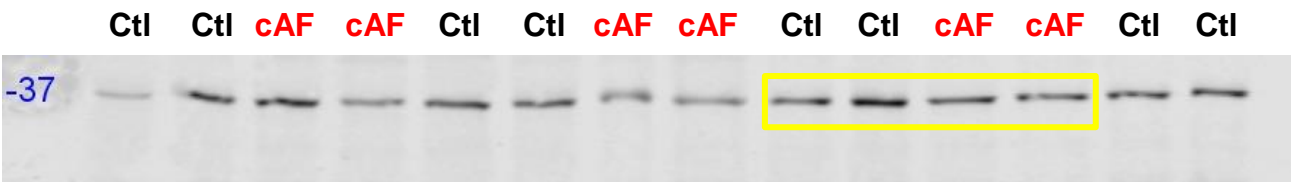

Gel 3

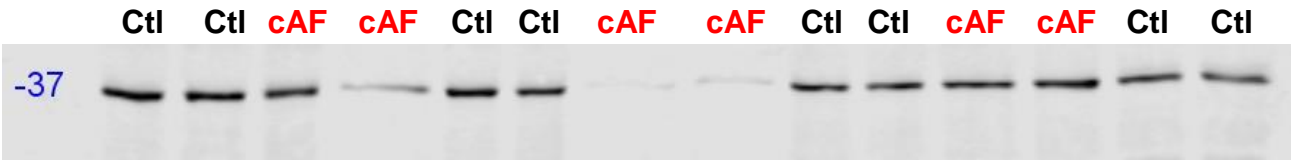

# GAPDH

Gel 1

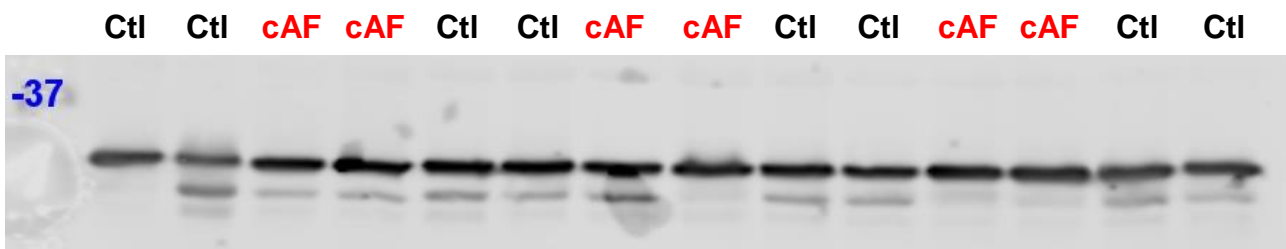

Gel 2

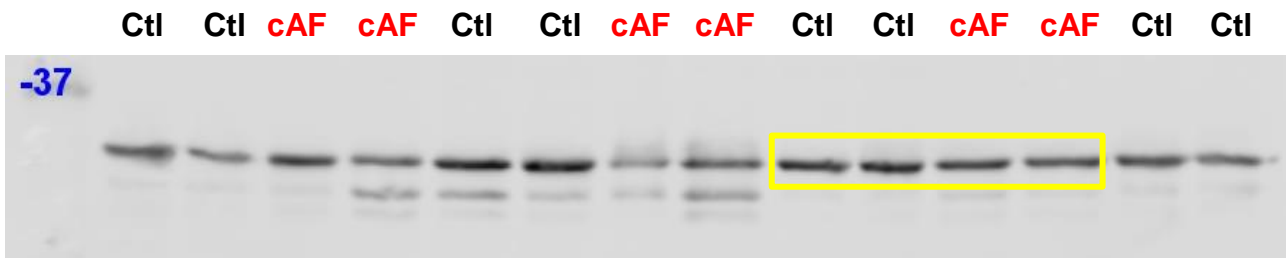

Gel 3

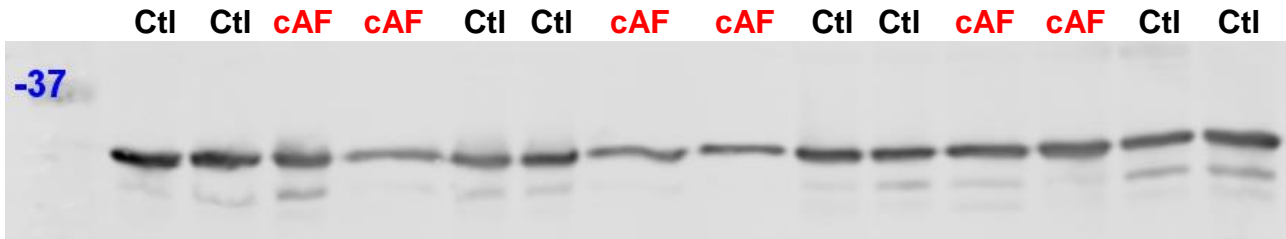

## Total-CaM

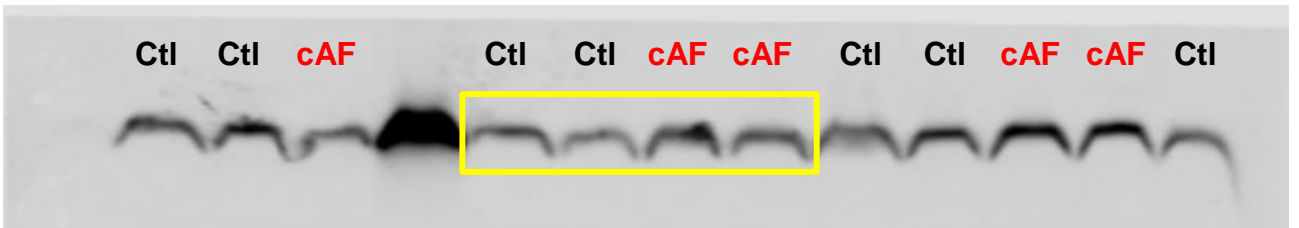

## Thr80-CaM

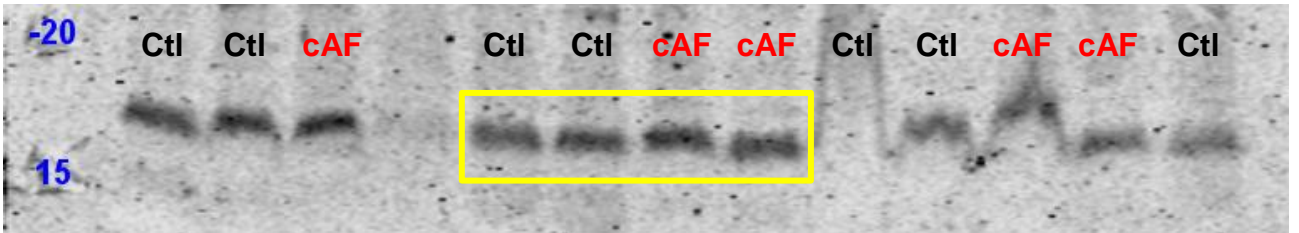

## GAPDH

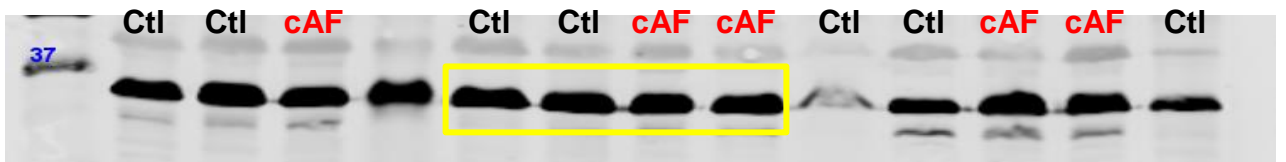

## CKII $\alpha$

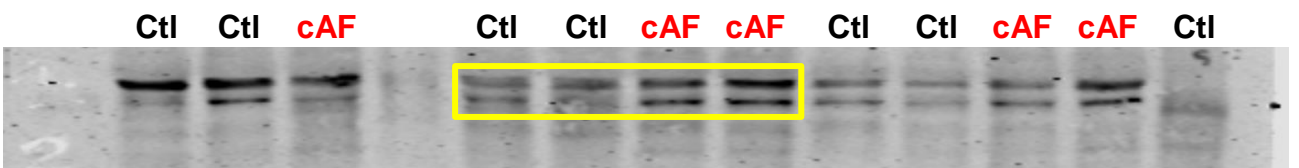

## PP2Ac

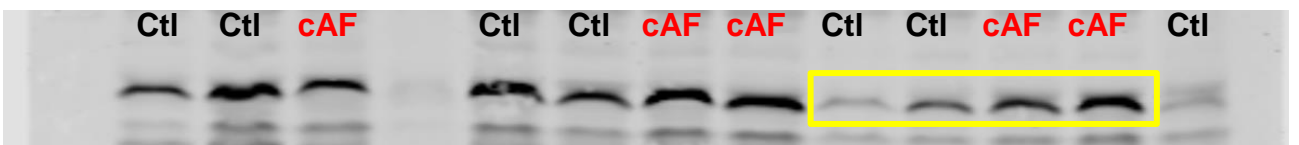

## GAPDH

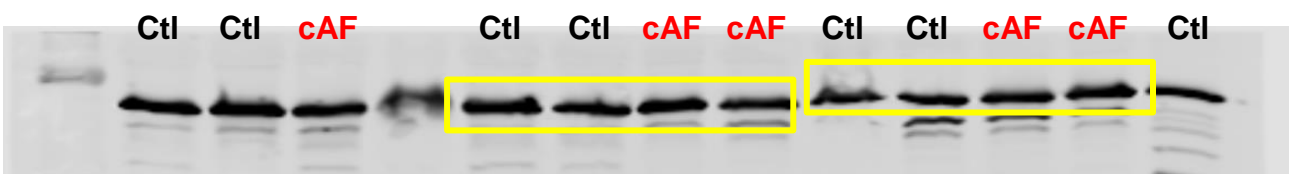

**$\alpha$ -Act2**  
**LA whole-tissue homogenates**

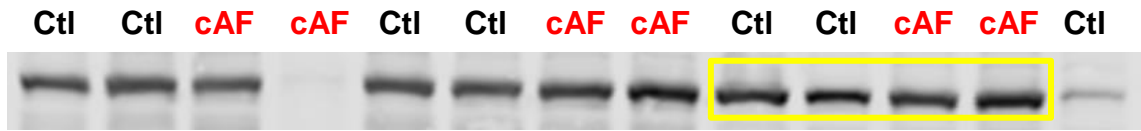

**$\alpha$ -Act2**  
**RA cardiomyocytes**

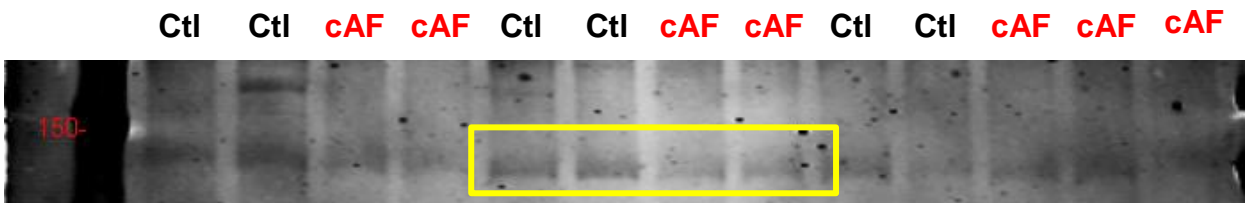

**TnC**  
**RA cardiomyocytes**

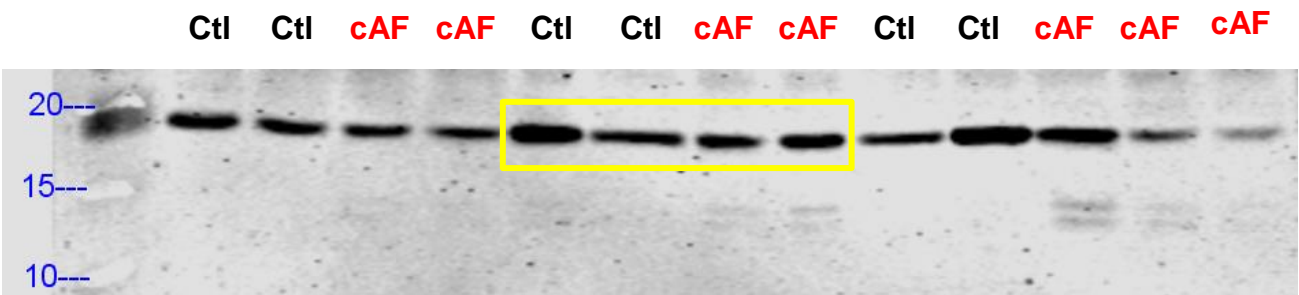

Same gel as shown on Slide 9



# $\alpha$ -Act2

Gel 1

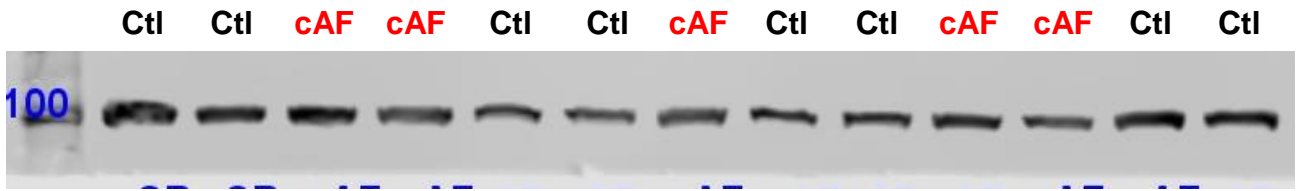

Gel 2

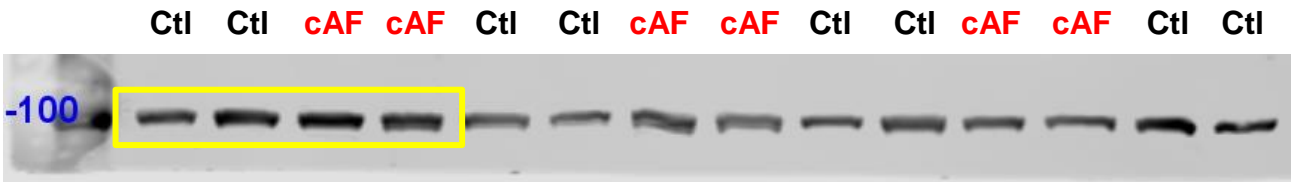

Gel 3

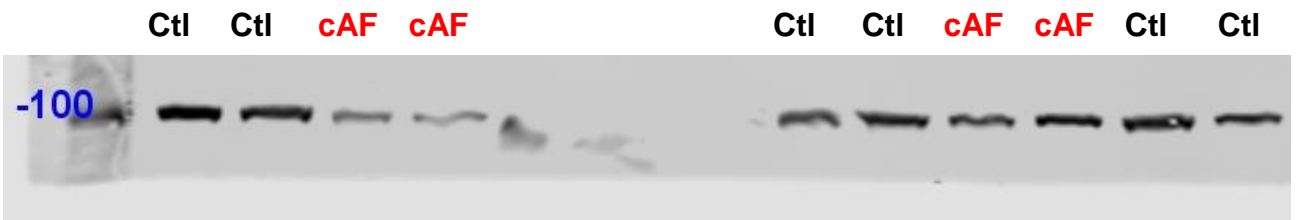

# GAPDH

Gel 1

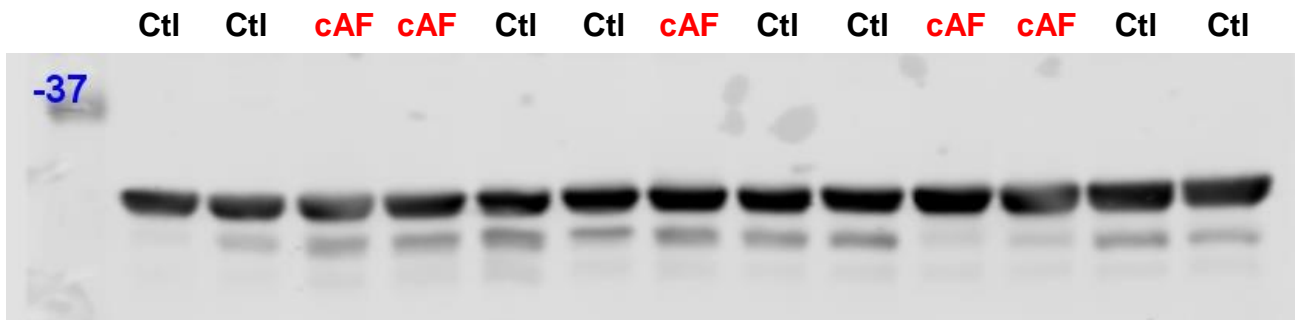

Gel 2

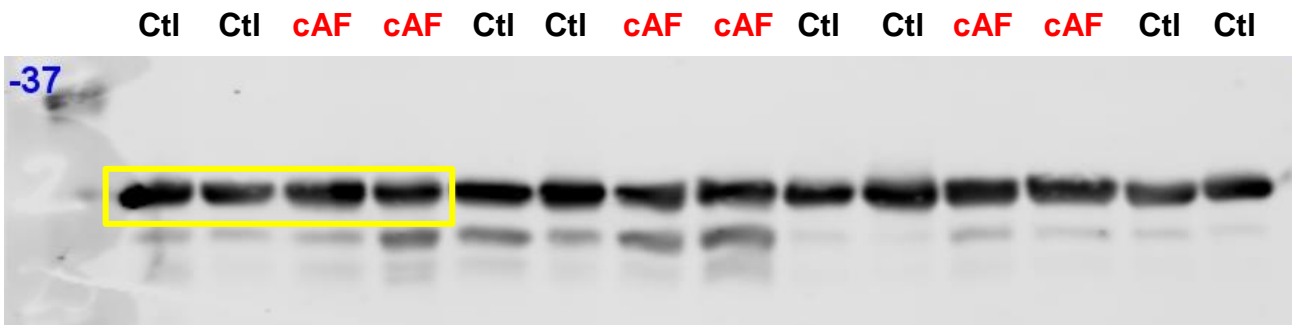

Gel 3

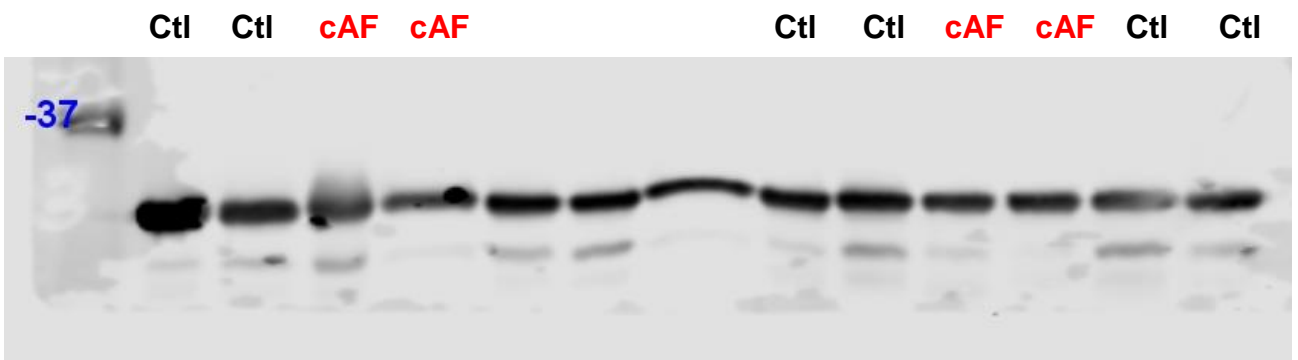

# SK1

Gel 1

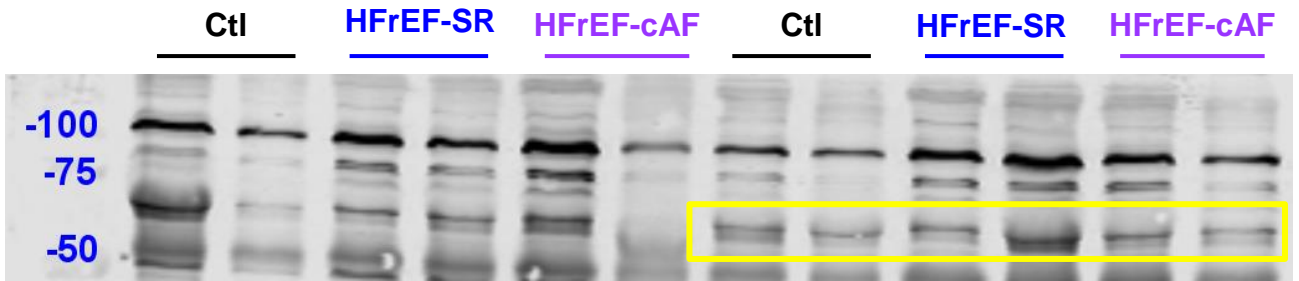

Gel 2

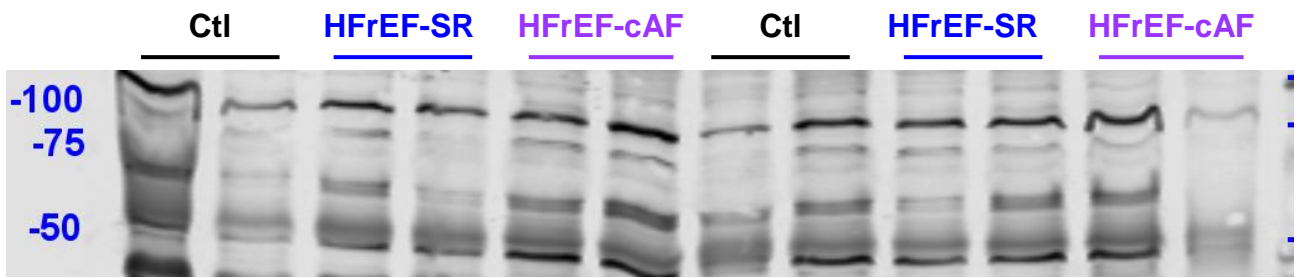

Gel 3

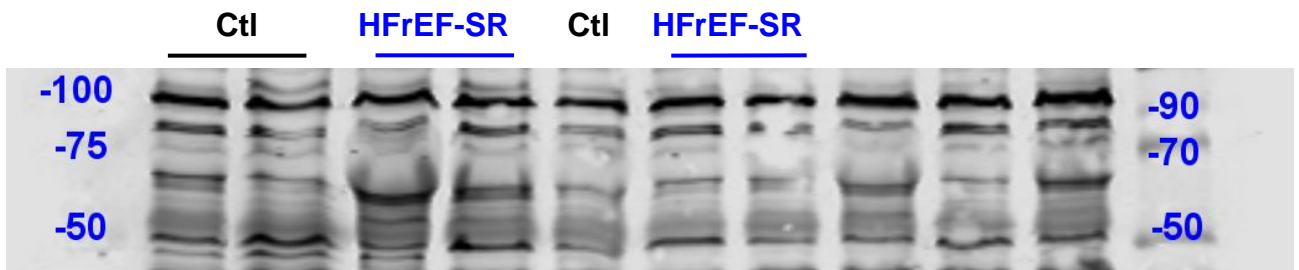

# SK2

Gel 1

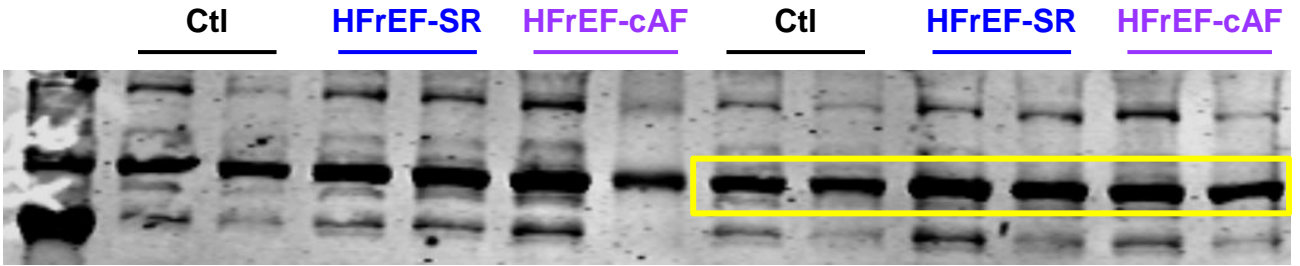

Gel 2

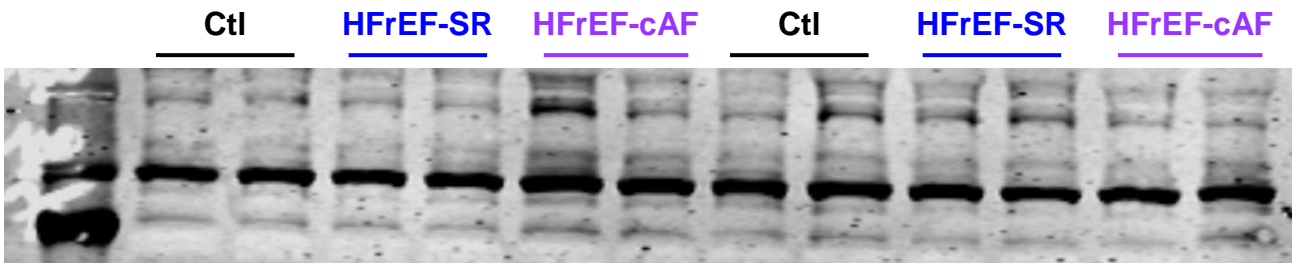

Gel 3

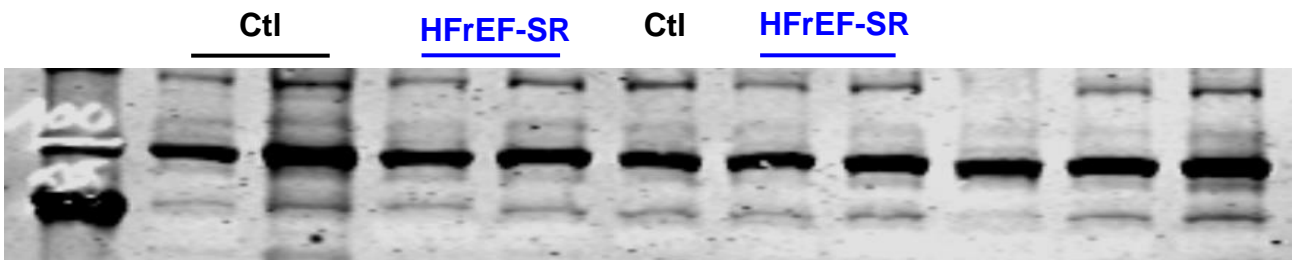

# SK3

Gel 1

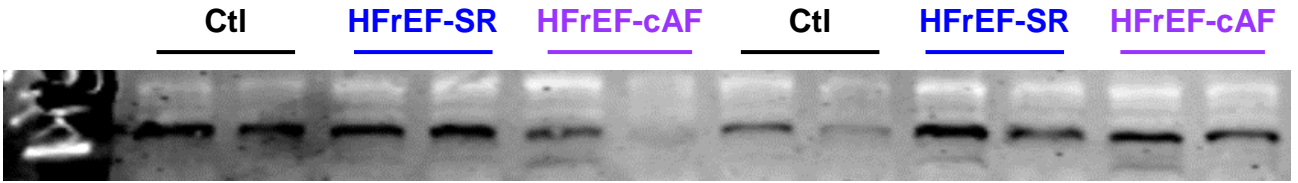

Gel 2

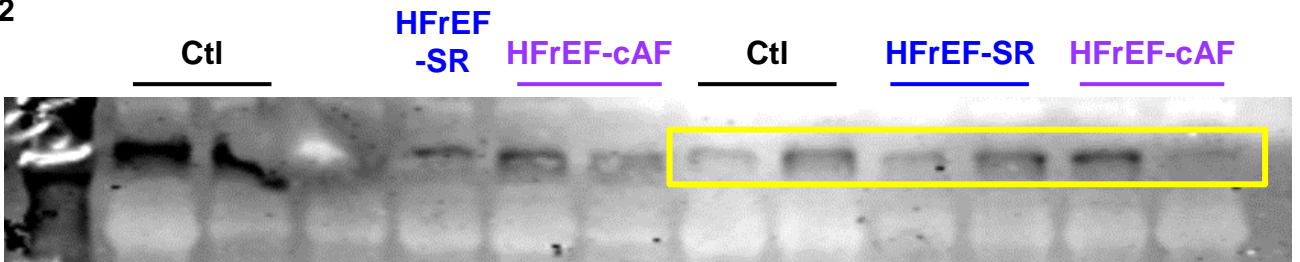

Gel 3

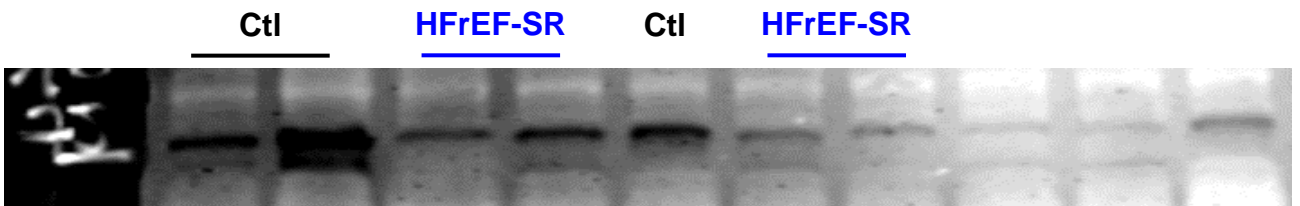

# PP2Ac

Gel 1

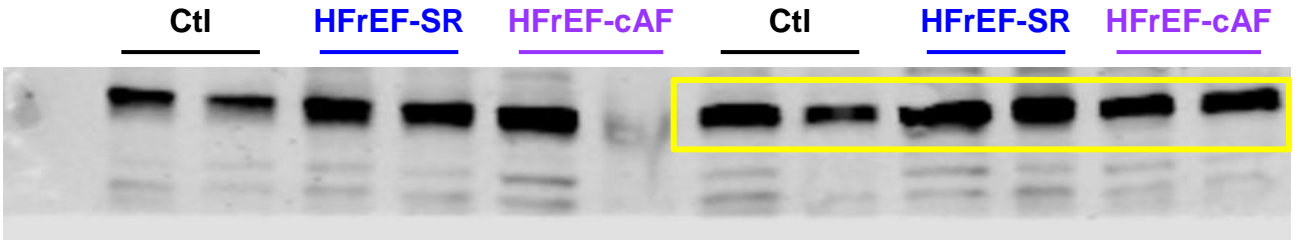

Gel 2

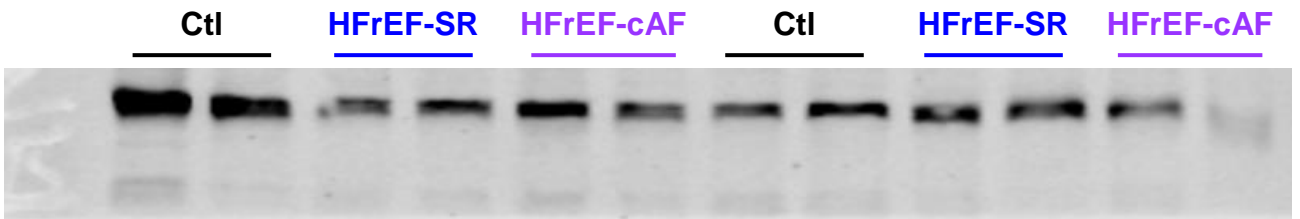

Gel 3

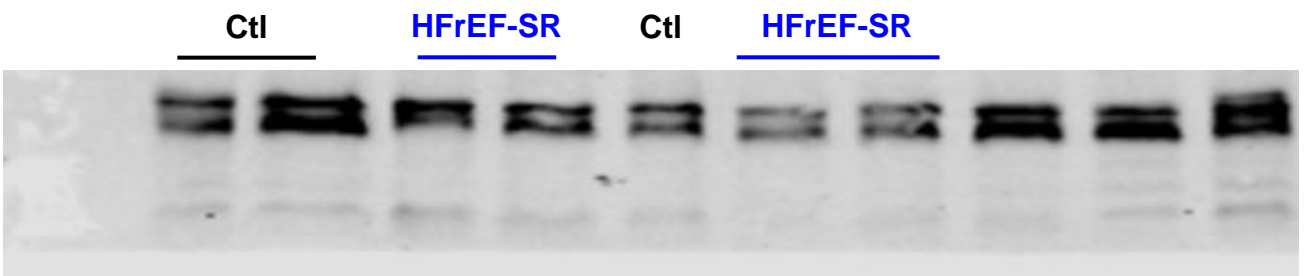

# GAPDH

Gel 1

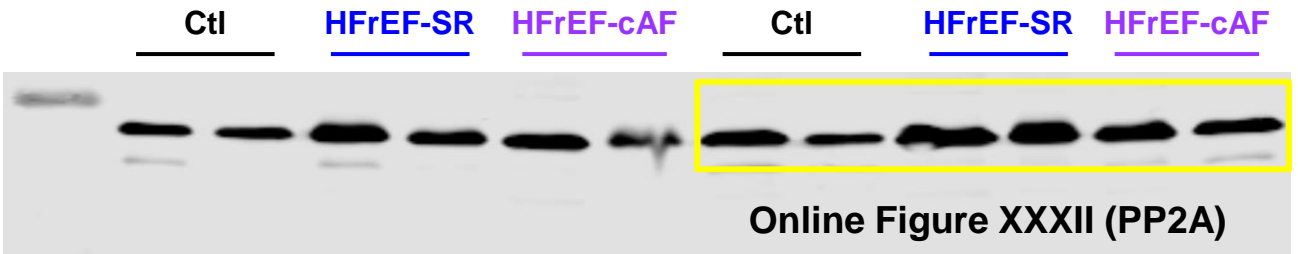

Gel 2

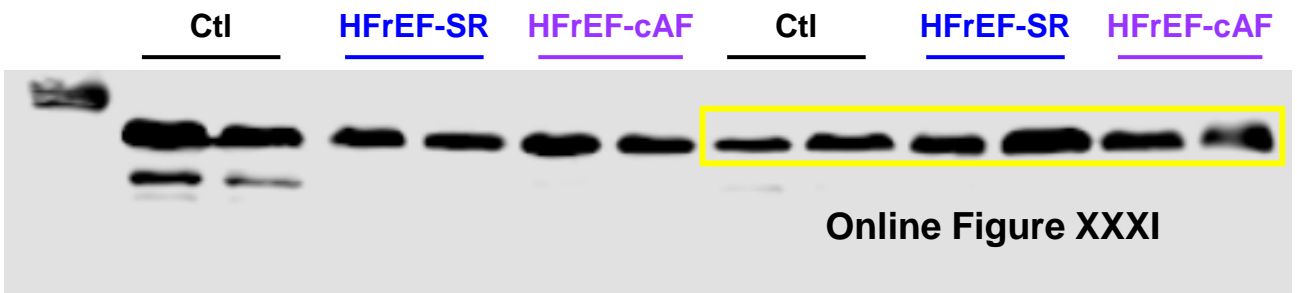

Gel 3

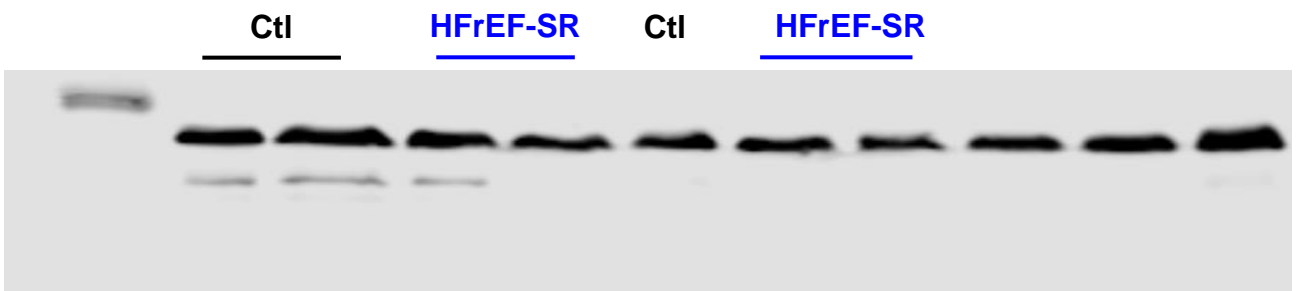

# Total-CaM

Gel 1

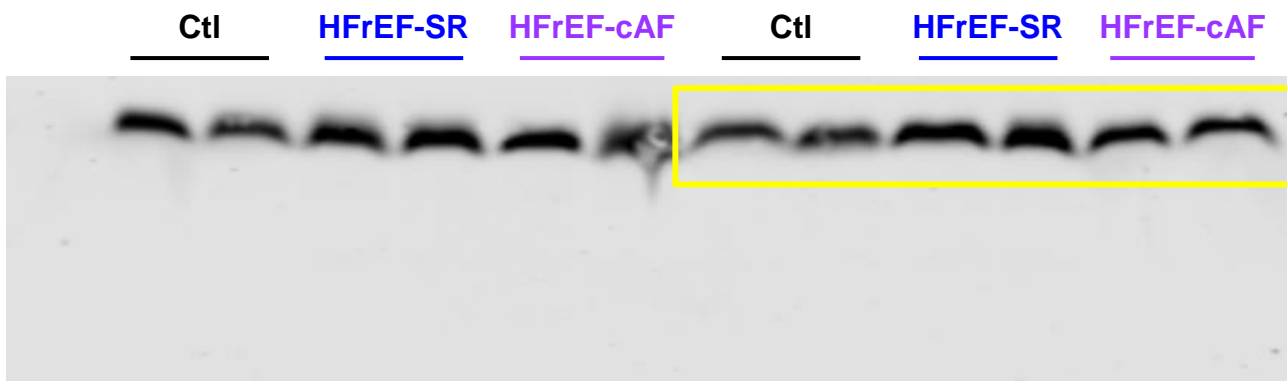

Gel 2

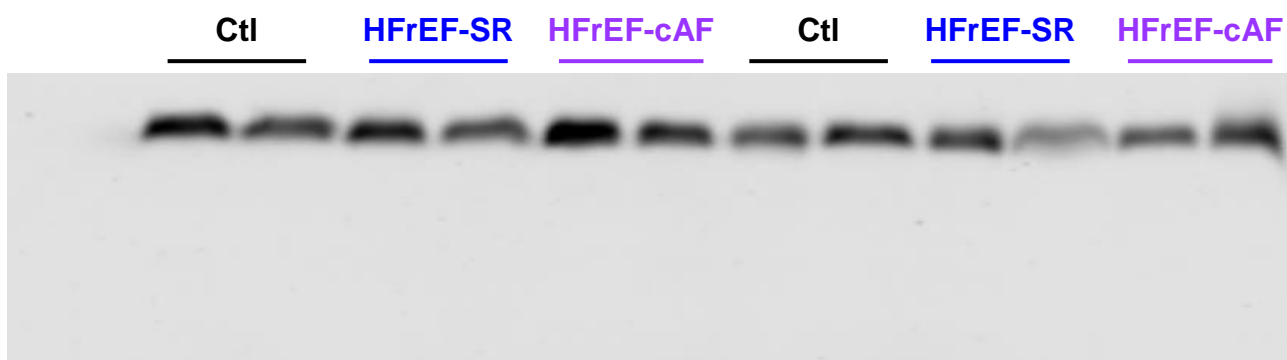

Gel 3

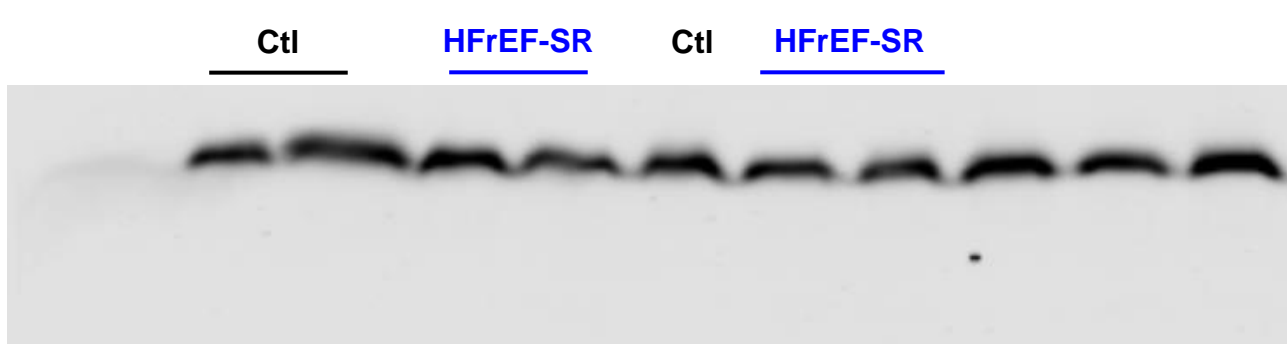



# Thr80-CaM

Gel 1

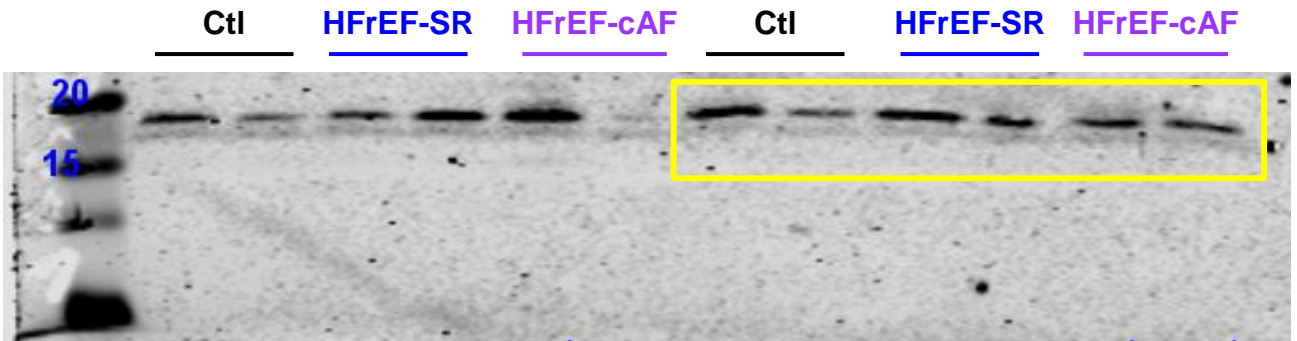

Gel 2

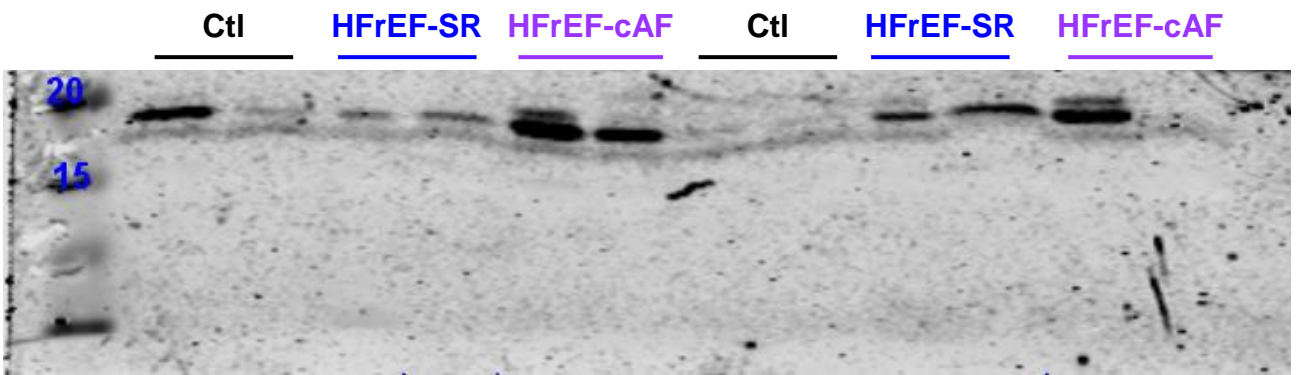

Gel 3

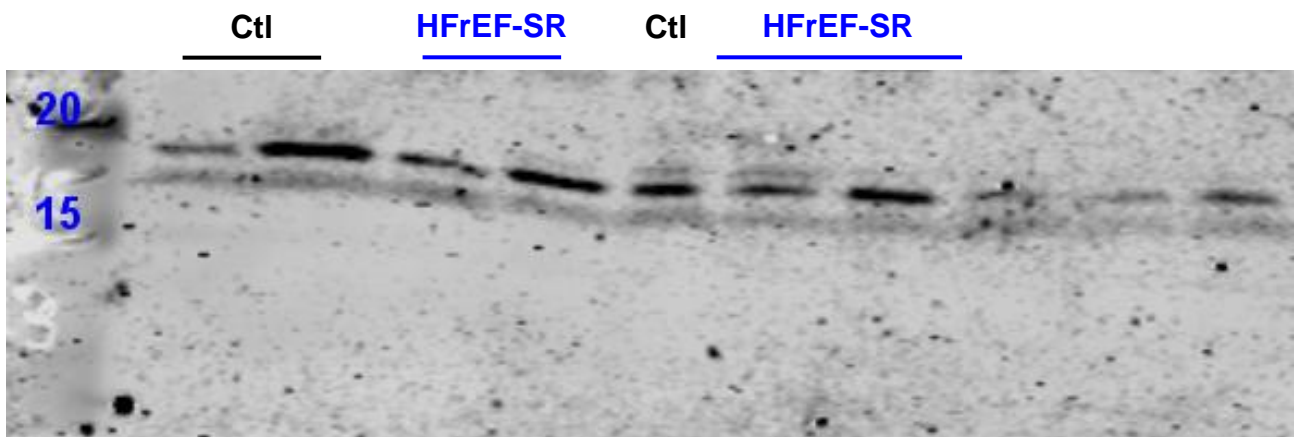

# GAPDH

Gel 1

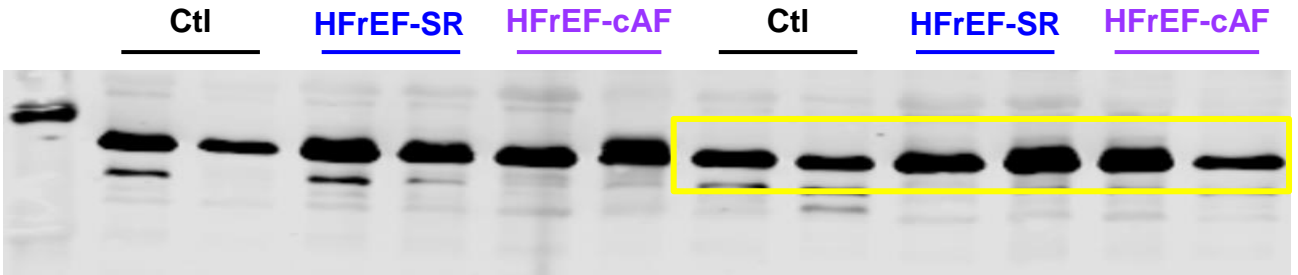

Gel 2

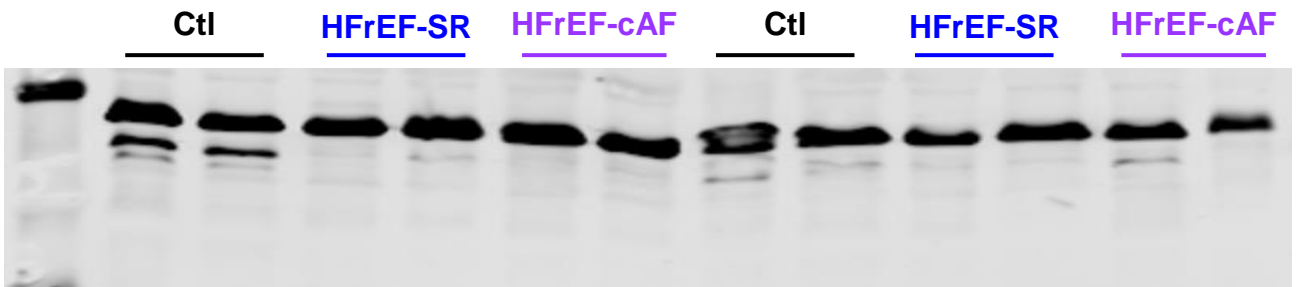

Gel 3

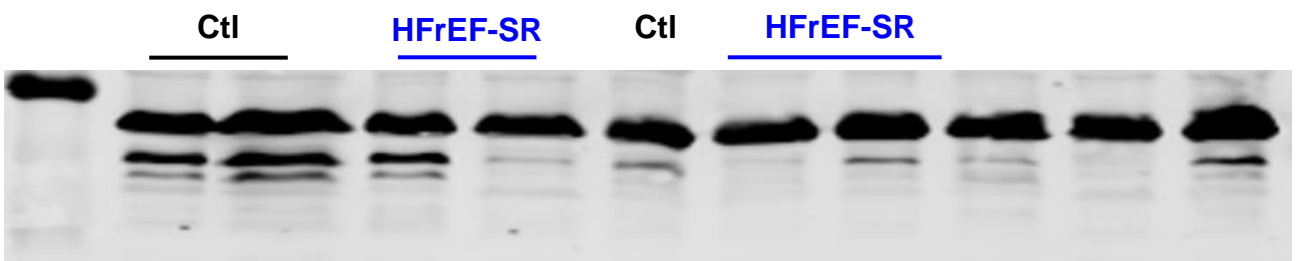

Supplement: NIHMS1881354-supplement-321858_Uncut_Gel_Blots.pdf [file NIHMS1881354-supplement-321858_Uncut_Gel_Blots.pdf]
