# Supplementary material
Source: PubMed Central journal article supplement (PMC10147588)
Supplement: NIHMS1881354-supplement-321858_Data_Supplement.pdf [file NIHMS1881354-supplement-321858_Data_Supplement.pdf]

## Supplemental Material

# Enhanced Ca<sup>2+</sup>-dependent SK-channel gating and membrane trafficking in human atrial fibrillation

Jordi Heijman, PhD\*; Xiaobo Zhou, MD\*; Stefano Morotti, PhD; Cristina E. Molina, PhD; Issam H. Abu-Taha, PhD; Marcel Tekook, PhD; Thomas Jespersen, PhD; Yiqiao Zhang; Shokoufeh Dobrev, PhD; Hendrik Milting, PhD; Jan Gummert, MD; Matthias Karck, MD; Markus Kamler, MD; Ali El-Armouche, MD; Arnela Saljic, PhD; Eleonora Grandi, PhD; Stanley Nattel, MD; Dobromir Dobrev, MD

\*Shared first authorship

### Corresponding Author:

Dobromir Dobrev, MD; Institute of Pharmacology, Hufelandstr 55, D-45122 Essen, Germany; Phone: +49-201-733-3477; Fax: +49-201-723-5593; E-mail: [dobromir.dobrev@uk-essen.de](mailto:dobromir.dobrev@uk-essen.de)

# Contents

|                                                                   |    |
|-------------------------------------------------------------------|----|
| Supplemental Material .....                                       | 1  |
| Comparison to previous literature.....                            | 3  |
| Patient Characteristics .....                                     | 5  |
| Association between clinical variables and primary outcomes ..... | 5  |
| Experimental Methods .....                                        | 19 |
| Whole-cell patch-clamp recordings.....                            | 19 |
| Quantitative real-time or digital polymerase chain reaction ..... | 19 |
| Co-immunoprecipitation and immunoblot.....                        | 20 |
| Immunostaining .....                                              | 20 |
| Computational Modeling .....                                      | 23 |
| Mathematical model of $I_{SK}$ .....                              | 23 |
| Other model parameter adjustments .....                           | 23 |
| Global parameter optimization .....                               | 24 |
| Model validation .....                                            | 24 |
| Analysis.....                                                     | 24 |
| Supplemental Figures .....                                        | 28 |

## Comparison to previous literature

Table S1. AF-related remodeling of SK-channel mRNA and protein levels in the current study and as reported in the literature.

| RA                                                                           |                                        |                             |                         |                        |                        |                        |                        |
|------------------------------------------------------------------------------|----------------------------------------|-----------------------------|-------------------------|------------------------|------------------------|------------------------|------------------------|
| Reference                                                                    | Patients                               | mRNA                        |                         |                        | Protein                |                        |                        |
|                                                                              |                                        | KCNN1                       | KCNN2                   | KCNN3                  | SK1                    | SK2                    | SK3                    |
| Tissue homogenates                                                           |                                        |                             |                         |                        |                        |                        |                        |
| <b>This study</b>                                                            | LVEF preserved; Ctl. Vs. cAF           | -17%<br>(n=14 vs. 14)       | -17%<br>(n=15 vs. 16)   | +41%*<br>(n=15 vs. 16) | -13%<br>(n=24 vs. 18)  | -1%<br>(n=24 vs. 18)   | +41%<br>(n=21 vs. 17)  |
| Rahm et al. <i>Physiol Rep.</i> 2021 <sup>57</sup> and <i>Life Sci.</i> 2021 | End-stage HF; Ctl. Vs. cAF             | -78%**<br>(n=10 vs. 10)     | -55%**<br>(n=10 vs. 10) | -48%*<br>(n=10 vs. 10) |                        |                        |                        |
| Darkow et al. <i>Front Physiol.</i> 2021 <sup>18</sup>                       | LVEF unknown, males only; Ctl. Vs. cAF | -29%<br>(n=12 vs. 6)        | -30%*<br>(n=12 vs. 6)   | -3%<br>(n=12 vs. 6)    |                        |                        |                        |
| Fan et al. <i>Med Sci Monit.</i> 2018 <sup>20</sup>                          | LVEF preserved; Ctl. Vs. cAF           | -76%*<br>(n=20 vs. 32)      | -63%*<br>(n=20 vs. 32)  | -74%*<br>(n=20 vs. 32) | -29%*<br>(n=20 vs. 32) | -39%*<br>(n=20 vs. 32) | -45%*<br>(n=20 vs. 32) |
| Skibsbye et al. <i>Cardiovasc Res</i> 2014 <sup>17</sup>                     | LVEF preserved; Ctl. Vs. cAF           | -19%<br>(n=10 vs. 14)       | -53%*<br>(n=10 vs. 14)  | -40%*<br>(n=10 vs. 14) |                        |                        |                        |
| Ling et al. <i>Heart Rhythm</i> 2013                                         | LVEF preserved; Ctl. Vs. cAF           |                             |                         |                        |                        |                        | -46%*<br>(n=3 vs. 3)   |
| Gaborit et al. <i>Circ</i> 2005                                              | Ctl-CAD vs. cAF-VHD                    |                             | -9%<br>(n=11 vs. 11)    |                        |                        |                        |                        |
| Cardiomyocytes                                                               |                                        |                             |                         |                        |                        |                        |                        |
| <b>This study</b>                                                            | LVEF preserved; Ctl. Vs. cAF           | -38% (P=0.069; n=12 vs. 12) | -37%*<br>(n=12 vs. 12)  | +49%<br>(n=12 vs. 12)  | +32%<br>(n=8 vs. 7)    | -14%<br>(n=13 vs. 11)  | +20%<br>(n=7 vs. 7)    |
| Yu et al. <i>Life Sci</i> 2012 <sup>26</sup>                                 | LVEF preserved; Ctl vs. cAF            | -84%*<br>(n=8 vs. 8)        | -84%**<br>(n=8 vs. 8)   | -3%<br>(n=8 vs. 8)     | -71%**<br>(n=8 vs. 8)  | -45%*<br>(n=8 vs. 8)   | -24%<br>(n=8 vs. 8)    |
| LA                                                                           |                                        |                             |                         |                        |                        |                        |                        |
| Reference                                                                    | Patients                               | mRNA                        |                         |                        | Protein                |                        |                        |
|                                                                              |                                        | KCNN1                       | KCNN2                   | KCNN3                  | SK1                    | SK2                    | SK3                    |
| Tissue homogenates                                                           |                                        |                             |                         |                        |                        |                        |                        |
| <b>This study</b>                                                            | LVEF preserved; Ctl. Vs. cAF           |                             |                         |                        | +9%<br>(n=7 vs. 5)     | +30%<br>(n=7 vs. 5)    | +38%<br>(n=7 vs. 5)    |
| Rahm et al. <i>Physiol Rep.</i> 2021 <sup>57</sup> and <i>Life Sci.</i> 2021 | End-stage HF; Ctl. Vs. cAF             | +91% (P=0.074; n=10 vs. 10) | -31%<br>(n=10 vs. 10)   | -4%<br>(n= 10 vs. 10)  |                        |                        |                        |
| Cardiomyocytes                                                               |                                        |                             |                         |                        |                        |                        |                        |
| Yu et al. <i>Life Sci</i> 2012 <sup>26</sup>                                 | LVEF preserved; Ctl vs. cAF            | -67%*<br>(n=8 vs. 8)        | -55%*<br>(n=8 vs. 8)    | -5%<br>(n=8 vs. 8)     | -49%*<br>(n=8 vs. 8)   | -63%*<br>(n=8 vs. 8)   | -8%<br>(n=8 vs. 8)     |

**Table S2. AF-related remodeling of SK-current ( $I_{SK}$ ) and its role in repolarization in the current study and in the literature.**

| RA                                                                    |                                                          |                           |                          |                                                                                                                    |                     |                        |                                                               |
|-----------------------------------------------------------------------|----------------------------------------------------------|---------------------------|--------------------------|--------------------------------------------------------------------------------------------------------------------|---------------------|------------------------|---------------------------------------------------------------|
| Reference                                                             | Patients                                                 | $I_{SK}$                  |                          |                                                                                                                    | APD                 |                        |                                                               |
|                                                                       |                                                          | [Ca <sup>2+</sup> ]       | Blocker                  | Result                                                                                                             | [Ca <sup>2+</sup> ] | Blocker                | Result                                                        |
| <b>This study</b>                                                     | LVEF preserved; Ctl. Vs. cAF                             | 500 nmol/L<br>1000 nmol/L | Apamin (100 nmol/L)      | 500 nmol/L: +397%* [-110 mV]; +544%* [+30 mV] (n=19/12 vs. 16/10)<br>1000 nmol/L: +705%* [-110 mV] (n=7/4 vs. 4/3) | 500 nmol/L          | Apamin (100 nmol/L)    | Ctl: +11% (n=8/5)<br>cAF: +39% (n=8/6)                        |
| Yu et al. Med Sci Monit. 2020 <sup>56</sup>                           | LVEF preserved; Ctl vs. cAF                              | 500 nmol/L                | Apamin (100 nmol/L)      | -110 mV: +281%*<br>+60 mV: +119%* (n=15/8 vs. 18/6)                                                                |                     |                        |                                                               |
| Shamsaldeen et al. Biochem Biophys Res Commun. 2019                   | LVEF preserved; mixed group (n=18), 5 with history of AF | Unknown <sup>#</sup>      | Apamin (100 nmol/L)      | +10 mV -14.3% $I_m$ by apamin                                                                                      |                     |                        |                                                               |
| Fan et al. Med Sci Monit. 2018 <sup>20</sup>                          | LVEF preserved; Ctl. Vs. cAF                             | 500 nmol/L                | Apamin (100 nmol/L)      | -110 mV: +134%**<br>+60 mV: +120%* (n=35/12 vs. 24/9)                                                              |                     |                        |                                                               |
| Wang et al. Zhongguo Ying Yong Sheng Li Xue Za Zhi 2014 <sup>25</sup> | Unknown                                                  | 500 nmol/L<br>1000 nmol/L | Apamin (100 nmol/L)      | -130 mV: +134%* [500 nmol/L] (n=6 vs. 3)<br>-130 mV: +43%* [1000 nmol/L] (n=8 vs. 4)                               |                     |                        |                                                               |
| Skibsbye et al. Cardiovasc Res 2014 <sup>17</sup>                     | LVEF preserved; Ctl. Vs. cAF                             | 300 nmol/L                | ICAGEN (100 $\mu$ mol/L) | Ctl: -28%* vs TMC (n=5 vs. n=4)<br>cAF: -23%* vs. TMC (n=6 vs. n=3)                                                | 35 nmol/L           | ICAGEN (1 $\mu$ mol/L) | Ctl: +13%* vs TMC (n=7 vs. 12)<br>cAF: -1% vs TMC (n=6 vs. 5) |
| Yu et al. Life Sci 2012 <sup>26</sup>                                 | LVEF preserved; Ctl vs. cAF                              | 900 nmol/L                | Apamin (100 nmol/L)      | -120 mV: -53%*<br>+80 mV: -55%* (n=31/18 vs. 27/14)                                                                | Perforated patch    | Apamin (100 nmol/L)    | Ctl: +86% (n=9/6)<br>cAF: +10% (n=7/5)                        |
| Li et al. Zhonghua Xin Xue Guan Bing Za Zhi 2011 <sup>24</sup>        | Valve surgery patients. Details unknown                  | 500 nmol/L                | Apamin (100 nmol/L)      | -130 mV: +167%* (n=15 vs. 7)                                                                                       |                     |                        |                                                               |
| Yu et al., Nan Fang Yi Ke Da Xue Xue Bao 2011                         | Congenital heart defects                                 | 1000 nmol/L               | Apamin (100 nmol/L)      | $I_{SK}$ present in Ctl (n=8)                                                                                      | Unknown             | Apamin (100 nmol/L)    | Slight $\uparrow$ APD in Ctl (n=8)                            |
| LA                                                                    |                                                          |                           |                          |                                                                                                                    |                     |                        |                                                               |
| Reference                                                             | Patients                                                 | $I_{SK}$                  |                          |                                                                                                                    | AP                  |                        |                                                               |
|                                                                       |                                                          | [Ca <sup>2+</sup> ]       | Blocker                  | Result                                                                                                             | [Ca <sup>2+</sup> ] | Blocker                | Result                                                        |
| Yu et al. Life Sci 2012 <sup>26</sup>                                 | LVEF preserved; Ctl vs. cAF                              | 900 nmol/L                | Apamin (100 nmol/L)      | -120 mV: -53%*<br>+80% -59%* (n=29/18 vs. 27/14)                                                                   | Perforated patch    | Apamin (100 nmol/L)    | Ctl: +61% (n=9/6)<br>cAF: +17% (n=7/5)                        |

## Patient Characteristics

Experimental protocols were approved by ethical review boards of University Hospital Essen (No. #12-5268-BO), Medical Faculty Mannheim, University of Heidelberg (No. 2011–216N-MA), and Medical Faculty, Ruhr-Universität Bochum (No. AZ 21/2013), and were conducted in accordance with the Declaration of Helsinki. Each patient provided written informed consent.

Right-atrial (RA) or left-atrial (LA) appendages were obtained from patients undergoing open heart surgery without a history of atrial fibrillation (Ctl) or with a history of long-standing persistent (chronic) atrial fibrillation (cAF). An overview of the clinical characteristics of all patients included in this study is provided in [Table S3](#).

The clinical characteristics of the subsets of patients from whom samples were used for patch-clamp, PCR, Western blot or immunocytochemistry experiments are shown in [Tables S4 through S10](#). Of note, 5 Ctl and 3 cAF patients undergoing open heart surgery were included for whom both RA and LA tissue samples were available for immunostaining ([Table S11](#)), enabling a direct comparison of SK-channel localization in both atria. Finally, a dedicated cohort of patients with preserved left-ventricular ejection-fraction (LVEF), a history of heart failure with reduced ( $\leq 35\%$ ) LVEF (HF<sub>r</sub>EF-SR) or HF<sub>r</sub>EF with cAF (HF<sub>r</sub>EF-cAF) were included to directly assess a potential modulating effect on cAF-related SK-channel remodeling. The clinical characteristics of these patients are shown in [Table S12](#).

### *Association between clinical variables and primary outcomes*

The association between clinical variables that were significantly different between Ctl and cAF cohorts and the primary outcomes (mRNA and protein levels of SK-channel subunits, their membrane localization, regulation of calmodulin, and SK-channel current) was assessed using two-way ANOVA analyses. The factors for these analyses were rhythm (Ctl vs. cAF) and either age (<72 vs.  $\geq 72$  years), sex (male vs. female), left-atrial diameter (LAD; <43 vs.  $\geq 43$  mm), presence of mitral valve insufficiency (MVI, yes/no), or diuretics use (yes/no). The threshold for age and LAD was based on their median value in the entire cohort. In addition, the potential effect of digitalis (which was present in a subset of cAF patients, but not in Ctl patients, precluding a two-way ANOVA analysis) was assessed by comparing values in cAF patients on digitalis vs. cAF patients without digitalis using Mann-Whitney tests. The significant associations are shown in [Figures S28 through S30](#) and the P-values of all analyses are shown in [Table S13](#).

**Table S3. Clinical characteristics of all patients employed in this study providing RA, LA or tissue from both atria.**

|                                | Ctl (n=182) |     | cAF (n=119) |     | P-value                      |
|--------------------------------|-------------|-----|-------------|-----|------------------------------|
|                                | Value       | N   | Value       | N   | Value                        |
| <b>Demographics</b>            |             |     |             |     |                              |
| Age (years)                    | 69 (60-77)  | 182 | 74 (69-79)  | 119 | <b>1.64x10<sup>-4</sup></b>  |
| Female gender                  | 50 (27.5%)  | 182 | 43 (36.1%)  | 119 | 0.112                        |
| BMI (kg / m <sup>2</sup> )     | 27 (25-30)  | 163 | 26 (24-30)  | 106 | 0.094                        |
| <b>Indication for surgery</b>  |             |     |             |     |                              |
| CAD                            | 70 (39.8%)  | 176 | 24 (21.2%)  | 113 | <b>1.55x10<sup>-3</sup></b>  |
| AVD/MVD                        | 61 (34.7%)  |     | 64 (56.6%)  |     |                              |
| CAD+AVD/MVD                    | 42 (23.9%)  |     | 23 (20.4%)  |     |                              |
| Other                          | 3 (1.7%)    |     | 2 (1.8%)    |     |                              |
| <b>Medical history</b>         |             |     |             |     |                              |
| Dyslipidemia                   | 110 (69.2%) | 159 | 58 (65.9%)  | 88  | 0.597                        |
| Diabetes                       | 50 (32.1%)  | 156 | 31 (34.4%)  | 90  | 0.700                        |
| Hypertension                   | 149 (86.6%) | 172 | 96 (89.7%)  | 107 | 0.443                        |
| <b>Echocardiography</b>        |             |     |             |     |                              |
| LA diameter (mm)               | 40.3±5.98   | 107 | 47.3±6.66   | 61  | <b>8.53x10<sup>-11</sup></b> |
| LVEF (%)                       | 56 (47-60)  | 166 | 58 (48-60)  | 102 | 0.901                        |
| Aortic valve insufficiency (%) | 57 (54.3%)  | 105 | 37 (57.8%)  | 64  | 0.654                        |
| Mitral valve insufficiency (%) | 75 (61.0%)  | 123 | 72 (83.7%)  | 86  | <b>3.96x10<sup>-4</sup></b>  |
| <b>Medication</b>              |             |     |             |     |                              |
| ACE inhibitors or ARBs         | 119 (68.0%) | 175 | 75 (67.6%)  | 111 | 0.939                        |
| Beta-blockers                  | 118 (67.4%) | 175 | 82 (73.9%)  | 111 | 0.247                        |
| Digitalis                      | 2 (1.1%)    | 174 | 24 (21.6%)  | 111 | <b>4.82x10<sup>-9</sup></b>  |
| Dihydropyridines               | 43 (24.7%)  | 174 | 27 (24.3%)  | 111 | 0.941                        |
| Diuretics                      | 67 (38.3%)  | 175 | 73 (65.8%)  | 111 | <b>5.89x10<sup>-6</sup></b>  |
| Lipid-lowering drugs           | 106 (60.6%) | 175 | 59 (53.2%)  | 111 | 0.216                        |
| Nitrates                       | 11 (6.3%)   | 174 | 8 (7.2%)    | 111 | 0.770                        |

Continuous variables are presented as mean±standard deviation for normal-distributed data or median and interquartile ranges. Categorical data are provided as number of patients (%). Continuous data were compared using unpaired Student's *t*-test or Mann-Whitney test for normal and non-normal data, respectively. Categorical data were compared using Chi-squared tests. Abbreviations: ACE, angiotensin-converting enzyme; ARB, angiotensin receptor blocker; AVD/MVD, aortic/mitral valve disease; BMI, body mass index; CAD, coronary artery disease; Dihydropyridines, dihydropyridine-type Ca<sup>2+</sup>-channel blockers; LA, left atrium; LVEF, left ventricular ejection fraction; N-numbers represent number of patients for which information on the corresponding clinical variable was available.

**Table S4A. Clinical characteristics of all patients employed for patch-clamp recordings in this study.**

|                                | Ctl (n=50)       |    | cAF (n=20)       |    | P-value      |
|--------------------------------|------------------|----|------------------|----|--------------|
|                                | Value            | N  | Value            | N  | Value        |
| <b>Demographics</b>            |                  |    |                  |    |              |
| Age (years)                    | 67.6±12.0        | 50 | 73.4±6.33        | 20 | <b>0.047</b> |
| Female gender                  | 7 (14.0%)        | 50 | 9 (45.0%)        | 20 | <b>0.005</b> |
| BMI (kg / m <sup>2</sup> )     | 26 (25-28)       | 43 | 26 (25-27)       | 14 | 0.390        |
| <b>Indication for surgery</b>  |                  |    |                  |    |              |
| CAD                            | 26 (57.8%)       | 45 | 7 (50.0%)        | 14 | 0.812        |
| AVD/MVD                        | 10 (22.2%)       |    | 3 (21.4%)        |    |              |
| CAD+AVD/MVD                    | 8 (17.8%)        |    | 3 (21.4%)        |    |              |
| Other                          | 1 (2.2%)         |    | 1 (7.1%)         |    |              |
| <b>Medical history</b>         |                  |    |                  |    |              |
| Dyslipidemia                   | 31 (79.5%)       | 39 | 6 (85.7%)        | 7  | 0.702        |
| Diabetes                       | 13 (33.3%)       | 39 | 2 (22.2%)        | 9  | 0.517        |
| Hypertension                   | 43 (97.7%)       | 44 | 11 (100.0%)      | 11 | 0.614        |
| <b>Echocardiography</b>        |                  |    |                  |    |              |
| LA diameter (mm)               | 35.0 (35.0-40.5) | 27 | 50.0 (43.5-50.0) | 5  | <b>0.019</b> |
| LVEF (%)                       | 52.1±13.4        | 42 | 51.1±10.5        | 9  | 0.816        |
| Aortic valve insufficiency (%) | 16 (61.5%)       | 26 | 4 (80.0%)        | 5  | 0.429        |
| Mitral valve insufficiency (%) | 17 (54.8%)       | 31 | 5 (71.4%)        | 7  | 0.422        |
| <b>Medication</b>              |                  |    |                  |    |              |
| ACE inhibitors or ARBs         | 35 (77.8%)       | 45 | 10 (76.9%)       | 13 | 0.948        |
| Beta-blockers                  | 35 (77.8%)       | 45 | 10 (76.9%)       | 13 | 0.948        |
| Digitalis                      | 0 (0.0%)         | 45 | 3 (23.1%)        | 13 | <b>0.001</b> |
| Dihydropyridines               | 16 (35.6%)       | 45 | 8 (61.5%)        | 13 | 0.094        |
| Diuretics                      | 12 (26.7%)       | 45 | 8 (61.5%)        | 13 | <b>0.020</b> |
| Lipid-lowering drugs           | 31 (68.9%)       | 45 | 9 (69.2%)        | 13 | 0.981        |
| Nitrates                       | 6 (13.3%)        | 45 | 3 (23.1%)        | 13 | 0.393        |

Continuous variables are presented as mean±standard deviation for normal-distributed data or median and interquartile ranges. Categorical data are provided as number of patients (%). Continuous data were compared using unpaired Student's *t*-test or Mann-Whitney test for normal and non-normal data, respectively. Categorical data were compared using Chi-squared tests. For abbreviations see [Table S3](#).

**Table S4B. Clinical characteristics of all patients employed for patch-clamp recordings presented in Figure 1 of this study.**

|                                | Ctl (n=12)  |    | cAF (n=10) |    | P-value      |
|--------------------------------|-------------|----|------------|----|--------------|
|                                | Value       | N  | Value      | N  | Value        |
| <b>Demographics</b>            |             |    |            |    |              |
| Age (years)                    | 64.0±10.5   | 12 | 74.5±6.38  | 10 | <b>0.016</b> |
| Female gender                  | 2 (16.7%)   | 12 | 7 (70.0%)  | 10 | <b>0.011</b> |
| BMI (kg / m <sup>2</sup> )     | 27 (26-28)  | 12 | 26 (25-27) | 5  | 0.328        |
| <b>Indication for surgery</b>  |             |    |            |    |              |
| CAD                            | 8 (57.8%)   | 12 | 1 (50.0%)  | 5  | 0.196        |
| AVD/MVD                        | 2 (22.2%)   |    | 2 (21.4%)  |    |              |
| CAD+AVD/MVD                    | 2 (17.8%)   |    | 1 (21.4%)  |    |              |
| Other                          | 0 (2.2%)    |    | 1 (7.1%)   |    |              |
| <b>Medical history</b>         |             |    |            |    |              |
| Dyslipidemia                   | 7 (63.6%)   | 11 | 2 (66.7%)  | 3  | 0.923        |
| Diabetes                       | 2 (16.7%)   | 12 | 0 (0.0%)   | 4  | 0.383        |
| Hypertension                   | 12 (100.0%) | 12 | 5 (100.0%) | 5  | N/A          |
| <b>Echocardiography</b>        |             |    |            |    |              |
| LA diameter (mm)               | 36 (35-40)  | 8  | 39 (37-41) | 2  | 0.978        |
| LVEF (%)                       | 55 (45-60)  | 12 | 60 (54-60) | 4  | 0.556        |
| Aortic valve insufficiency (%) | 5 (50.0%)   | 10 | 2 (66.7%)  | 3  | 0.612        |
| Mitral valve insufficiency (%) | 4 (44.4%)   | 9  | 3 (75.0%)  | 4  | 0.308        |
| <b>Medication</b>              |             |    |            |    |              |
| ACE inhibitors or ARBs         | 9 (75.0%)   | 12 | 3 (60.0%)  | 5  | 0.536        |
| Beta-blockers                  | 9 (75.0%)   | 12 | 3 (60.0%)  | 5  | 0.536        |
| Digitalis                      | 0 (0.0%)    | 12 | 3 (60.0%)  | 5  | <b>0.003</b> |
| Dihydropyridines               | 3 (25.0%)   | 12 | 3 (60.0%)  | 5  | 0.169        |
| Diuretics                      | 3 (25.0%)   | 12 | 2 (40.0%)  | 5  | 0.536        |
| Lipid-lowering drugs           | 6 (50.0%)   | 12 | 3 (60.0%)  | 5  | 0.707        |
| Nitrates                       | 1 (8.3%)    | 12 | 1 (20.0%)  | 5  | 0.496        |

Continuous variables are presented as mean±standard deviation for normal-distributed data or median and interquartile ranges. Categorical data are provided as number of patients (%). Continuous data were compared using unpaired Student's *t*-test or Mann-Whitney test for normal and non-normal data, respectively. Categorical data were compared using Chi-squared tests. N/A: not applicable. For other abbreviations see [Table S3](#).



**Table S5. Clinical characteristics of all patients providing right-atrial whole-tissue homogenates employed for qPCR experiments in this study.**

|                                | Ctl (n=15) |    | cAF (n=16)  |    | P-value      |
|--------------------------------|------------|----|-------------|----|--------------|
|                                | Value      | N  | Value       | N  | Value        |
| <b>Demographics</b>            |            |    |             |    |              |
| Age (years)                    | 69.1±8.42  | 15 | 76.0±6.87   | 16 | <b>0.022</b> |
| Female gender                  | 3 (20.0%)  | 15 | 4 (25.0%)   | 16 | 0.739        |
| BMI (kg / m <sup>2</sup> )     | 28.0±4.81  | 15 | 25.9±3.68   | 16 | 0.201        |
| <b>Indication for surgery</b>  |            |    |             |    |              |
| CAD                            | 5 (33.3%)  | 15 | 4 (25.0%)   | 16 | <b>0.010</b> |
| AVD/MVD                        | 3 (20.0%)  |    | 10 (62.5%)  |    |              |
| CAD+AVD/MVD                    | 7 (46.7%)  |    | 2 (12.5%)   |    |              |
| Other                          | 0 (0%)     |    | 0 (0.0%)    |    |              |
| <b>Medical history</b>         |            |    |             |    |              |
| Dyslipidemia                   | 10 (66.7%) | 15 | 8 (50.0%)   | 16 | 0.347        |
| Diabetes                       | 7 (50.0%)  | 14 | 7 (43.8%)   | 16 | 0.732        |
| Hypertension                   | 11 (73.3%) | 15 | 16 (100.0%) | 16 | <b>0.027</b> |
| <b>Echocardiography</b>        |            |    |             |    |              |
| LA diameter (mm)               | 36 (35-39) | 4  | 48 (48-48)  | 5  | <b>0.032</b> |
| LVEF (%)                       | 55 (45-60) | 14 | 60 (58-63)  | 15 | 0.100        |
| Aortic valve insufficiency (%) | 5 (100.0%) | 5  | 6 (100.0%)  | 6  | N/A          |
| Mitral valve insufficiency (%) | 4 (66.7%)  | 6  | 7 (100.0%)  | 7  | 0.097        |
| <b>Medication</b>              |            |    |             |    |              |
| ACE inhibitors or ARBs         | 5 (33.3%)  | 15 | 7 (43.8%)   | 16 | 0.552        |
| Beta-blockers                  | 9 (60.0%)  | 15 | 12 (75.0%)  | 16 | 0.372        |
| Digitalis                      | 0 (0.0%)   | 15 | 4 (25.0%)   | 16 | <b>0.038</b> |
| Dihydropyridines               | 2 (13.3%)  | 15 | 5 (31.3%)   | 16 | 0.233        |
| Diuretics                      | 3 (20.0%)  | 15 | 12 (75.0%)  | 16 | <b>0.002</b> |
| Lipid-lowering drugs           | 9 (60.0%)  | 15 | 11 (68.8%)  | 16 | 0.611        |
| Nitrates                       | 0 (0.0%)   | 15 | 0 (0.0%)    | 16 | N/A          |

Continuous variables are presented as mean±standard deviation for normal-distributed data or median and interquartile ranges. Categorical data are provided as number of patients (%). Continuous data were compared using unpaired Student's *t*-test or Mann-Whitney test for normal and non-normal data, respectively. Categorical data were compared using Chi-squared tests. N/A: not applicable. For other abbreviations see [Table S3](#).

**Table S6. Clinical characteristics of all patients providing right-atrial whole-tissue homogenates employed for Western blot experiments in this study.**

|                                | Ctl (n=60) |    | cAF (n=46) |    | P-value      |
|--------------------------------|------------|----|------------|----|--------------|
|                                | Value      | N  | Value      | N  |              |
| <b>Demographics</b>            |            |    |            |    |              |
| Age (years)                    | 70 (60-77) | 45 | 71 (64-76) | 30 | 0.741        |
| Female gender                  | 12 (26.7%) | 45 | 10 (33.3%) | 30 | 0.534        |
| BMI (kg / m <sup>2</sup> )     | 28 (26-32) | 40 | 27 (25-30) | 27 | 0.283        |
| <b>Indication for surgery</b>  |            |    |            |    |              |
| CAD                            | 19 (42.2%) | 45 | 5 (16.7%)  | 30 | 0.052        |
| AVD/MVD                        | 17 (37.8%) |    | 19 (63.3%) |    |              |
| CAD+AVD/MVD                    | 9 (20.0%)  |    | 5 (16.7%)  |    |              |
| Other                          | 0 (0.0%)   |    | 1 (3.3%)   |    |              |
| <b>Medical history</b>         |            |    |            |    |              |
| Dyslipidemia                   | 27 (65.9%) | 41 | 19 (73.1%) | 26 | 0.535        |
| Diabetes                       | 13 (31.7%) | 41 | 7 (30.4%)  | 23 | 0.916        |
| Hypertension                   | 40 (88.9%) | 45 | 27 (93.1%) | 29 | 0.545        |
| <b>Echocardiography</b>        |            |    |            |    |              |
| LA diameter (mm)               | 41.2±5.94  | 22 | 46.9±9.49  | 13 | <b>0.043</b> |
| LVEF (%)                       | 55 (50-64) | 42 | 59 (50-60) | 29 | 0.669        |
| Aortic valve insufficiency (%) | 16 (57.1%) | 28 | 7 (36.8%)  | 19 | 0.172        |
| Mitral valve insufficiency (%) | 14 (48.3%) | 29 | 21 (87.5%) | 24 | <b>0.003</b> |
| <b>Medication</b>              |            |    |            |    |              |
| ACE inhibitors or ARBs         | 30 (69.8%) | 43 | 22 (73.3%) | 30 | 0.741        |
| Beta-blockers                  | 27 (62.8%) | 43 | 23 (76.7%) | 30 | 0.209        |
| Digitalis                      | 1 (2.3%)   | 43 | 6 (20.0%)  | 30 | <b>0.012</b> |
| Dihydropyridines               | 13 (30.2%) | 43 | 4 (13.3%)  | 30 | 0.093        |
| Diuretics                      | 18 (41.9%) | 43 | 17 (56.7%) | 30 | 0.213        |
| Lipid-lowering drugs           | 22 (51.2%) | 43 | 16 (53.3%) | 30 | 0.855        |
| Nitrates                       | 4 (9.3%)   | 43 | 4 (13.3%)  | 30 | 0.588        |

Continuous variables are presented as mean±standard deviation for normal-distributed data or median and interquartile ranges. Categorical data are provided as number of patients (%). Continuous data were compared using unpaired Student's *t*-test or Mann-Whitney test for normal and non-normal data, respectively. Categorical data were compared using Chi-squared tests. For abbreviations see [Table S3](#).

**Table S7. Clinical characteristics of all patients providing right-atrial cardiomyocytes employed for digital PCR experiments in this study.**

|                                | Ctl (n=12)  |    | cAF (n=12)  |    | P-value      |
|--------------------------------|-------------|----|-------------|----|--------------|
|                                | Value       | N  | Value       | N  | Value        |
| <b>Demographics</b>            |             |    |             |    |              |
| Age (years)                    | 65.8±8.48   | 12 | 73.3±7.25   | 12 | <b>0.037</b> |
| Female gender                  | 2 (16.7%)   | 12 | 3 (25.0%)   | 12 | 0.615        |
| BMI (kg / m <sup>2</sup> )     | 27 (26-29)  | 12 | 26 (24-29)  | 12 | 0.453        |
| <b>Indication for surgery</b>  |             |    |             |    |              |
| CAD                            | 6 (50.0%)   | 12 | 3 (25.0%)   | 12 | 0.403        |
| AVD/MVD                        | 4 (33.3%)   |    | 7 (58.3%)   |    |              |
| CAD+AVD/MVD                    | 2 (16.7%)   |    | 2 (16.7%)   |    |              |
| Other                          | 0 (0.0%)    |    | 0 (0%)      |    |              |
| <b>Medical history</b>         |             |    |             |    |              |
| Dyslipidemia                   | 10 (100.0%) | 10 | 3 (100.0%)  | 3  | N/A          |
| Diabetes                       | 2 (28.6%)   | 7  | 1 (100.0%)  | 1  | 0.168        |
| Hypertension                   | 11 (100.0%) | 11 | 10 (100.0%) | 10 | N/A          |
| <b>Echocardiography</b>        |             |    |             |    |              |
| LA diameter (mm)               | 41.69±7.69  | 9  | 45.22±5.53  | 9  | 0.307        |
| LVEF (%)                       | 54.18±6.09  | 11 | 53.45±8.14  | 11 | 0.823        |
| Aortic valve insufficiency (%) | 4 (100.0%)  | 4  | 3 (100.0%)  | 3  | N/A          |
| Mitral valve insufficiency (%) | 9 (100.0%)  | 9  | 9 (100.0%)  | 9  | N/A          |
| <b>Medication</b>              |             |    |             |    |              |
| ACE inhibitors or ARBs         | 10 (83.3%)  | 12 | 10 (83.3%)  | 12 | 1.000        |
| Beta-blockers                  | 7 (58.3%)   | 12 | 11 (91.7%)  | 12 | 0.059        |
| Digitalis                      | 0 (0.0%)    | 12 | 0 (0.0%)    | 12 | N/A          |
| Dihydropyridines               | 4 (33.3%)   | 12 | 2 (16.7%)   | 12 | 0.346        |
| Diuretics                      | 4 (33.3%)   | 12 | 9 (75.0%)   | 12 | <b>0.041</b> |
| Lipid-lowering drugs           | 9 (75.0%)   | 12 | 5 (41.7%)   | 12 | 0.098        |
| Nitrates                       | 0 (0.0%)    | 12 | 0 (0.0%)    | 12 | N/A          |

Continuous variables are presented as mean±standard deviation for normal-distributed data or median and interquartile ranges. Categorical data are provided as number of patients (%). Continuous data were compared using unpaired Student's *t*-test or Mann-Whitney test for normal and non-normal data, respectively. Categorical data were compared using Chi-squared tests. N/A: not applicable. For other abbreviations see [Table S3](#).

**Table S8. Clinical characteristics of all patients providing right-atrial cardiomyocytes employed for Western blot experiments in this study.**

|                                | Ctl (n=27) |    | cAF (n=28) |    | P-value      |
|--------------------------------|------------|----|------------|----|--------------|
|                                | Value      | N  | Value      | N  | Value        |
| <b>Demographics</b>            |            |    |            |    |              |
| Age (years)                    | 66.7±13.1  | 15 | 70.5±11.8  | 16 | 0.423        |
| Female gender                  | 7 (46.7%)  | 15 | 10 (62.5%) | 16 | 0.376        |
| BMI (kg / m <sup>2</sup> )     | 27 (23-28) | 15 | 26 (24-28) | 16 | 0.945        |
| <b>Indication for surgery</b>  |            |    |            |    |              |
| CAD                            | 5 (33.3%)  | 15 | 0 (0.0%)   | 16 | <b>0.002</b> |
| AVD/MVD                        | 10 (66.7%) |    | 9 (56.3%)  |    |              |
| CAD+AVD/MVD                    | 0 (0.0%)   |    | 7 (43.8%)  |    |              |
| Other                          | 0 (0.0%)   |    | 0 (0.0%)   |    |              |
| <b>Medical history</b>         |            |    |            |    |              |
| Dyslipidemia                   | 7 (53.8%)  | 13 | 6 (50.0%)  | 12 | 0.848        |
| Diabetes                       | 3 (20.0%)  | 15 | 6 (37.5%)  | 16 | 0.283        |
| Hypertension                   | 13 (86.7%) | 15 | 13 (81.3%) | 16 | 0.682        |
| <b>Echocardiography</b>        |            |    |            |    |              |
| LA diameter (mm)               | 42.80±5.83 | 10 | 46.75±4.12 | 8  | 0.146        |
| LVEF (%)                       | 58.36±9.08 | 14 | 55.93±8.94 | 15 | 0.491        |
| Aortic valve insufficiency (%) | 4 (26.7%)  | 15 | 6 (54.5%)  | 11 | 0.149        |
| Mitral valve insufficiency (%) | 9 (64.3%)  | 14 | 14 (87.5%) | 16 | 0.134        |
| <b>Medication</b>              |            |    |            |    |              |
| ACE inhibitors or ARBs         | 10 (66.7%) | 15 | 11 (73.3%) | 15 | 0.690        |
| Beta-blockers                  | 9 (60.0%)  | 15 | 11 (73.3%) | 15 | 0.439        |
| Digitalis                      | 0 (0.0%)   | 15 | 6 (40.0%)  | 15 | <b>0.006</b> |
| Dihydropyridines               | 1 (6.7%)   | 15 | 2 (13.3%)  | 15 | 0.543        |
| Diuretics                      | 4 (26.7%)  | 15 | 7 (46.7%)  | 15 | 0.256        |
| Lipid-lowering drugs           | 6 (40.0%)  | 15 | 4 (26.7%)  | 15 | 0.439        |
| Nitrates                       | 1 (6.7%)   | 15 | 1 (6.7%)   | 15 | 1.000        |

Continuous variables are presented as mean±standard deviation for normal-distributed data or median and interquartile ranges. Categorical data are provided as number of patients (%). Continuous data were compared using unpaired Student's *t*-test or Mann-Whitney test for normal and non-normal data, respectively. Categorical data were compared using Chi-squared tests. For abbreviations see [Table S3](#).

**Table S9. Clinical characteristics of all patients providing right-atrial cardiomyocytes employed for immunocytochemistry experiments in this study.**

|                                | Ctl (n=13) |    | cAF (n=12)  |    | P-value      |
|--------------------------------|------------|----|-------------|----|--------------|
|                                | Value      | N  | Value       | N  | Value        |
| <b>Demographics</b>            |            |    |             |    |              |
| Age (years)                    | 64 (59-72) | 13 | 77 (74-80)  | 12 | <b>0.018</b> |
| Female gender                  | 6 (46.2%)  | 13 | 2 (16.7%)   | 12 | 0.114        |
| BMI (kg / m <sup>2</sup> )     | 27.5±4.05  | 13 | 27.6±3.50   | 11 | 0.966        |
| <b>Indication for surgery</b>  |            |    |             |    |              |
| CAD                            | 3 (23.1%)  | 13 | 4 (33.3%)   | 12 | 0.456        |
| AVD/MVD                        | 3 (23.1%)  |    | 5 (41.7%)   |    |              |
| CAD+AVD/MVD                    | 6 (46.2%)  |    | 3 (25.0%)   |    |              |
| Other                          | 1 (7.7%)   |    | 0 (0%)      |    |              |
| <b>Medical history</b>         |            |    |             |    |              |
| Dyslipidemia                   | 10 (76.9%) | 13 | 10 (90.9%)  | 11 | 0.360        |
| Diabetes                       | 6 (50.0%)  | 12 | 4 (36.4%)   | 11 | 0.510        |
| Hypertension                   | 12 (92.3%) | 13 | 11 (100.0%) | 11 | 0.347        |
| <b>Echocardiography</b>        |            |    |             |    |              |
| LA diameter (mm)               | 39 (35-45) | 9  | 49 (45-50)  | 5  | 0.072        |
| LVEF (%)                       | 60 (59-60) | 11 | 60 (60-60)  | 9  | 0.676        |
| Aortic valve insufficiency (%) | 2 (40.0%)  | 5  | 2 (50.0%)   | 4  | 0.764        |
| Mitral valve insufficiency (%) | 8 (88.9%)  | 9  | 5 (83.3%)   | 6  | 0.756        |
| <b>Medication</b>              |            |    |             |    |              |
| ACE inhibitors or ARBs         | 8 (61.5%)  | 13 | 7 (58.3%)   | 12 | 0.870        |
| Beta-blockers                  | 9 (69.2%)  | 13 | 8 (66.7%)   | 12 | 0.891        |
| Digitalis                      | 1 (7.7%)   | 13 | 2 (16.7%)   | 12 | 0.490        |
| Dihydropyridines               | 1 (7.7%)   | 13 | 4 (33.3%)   | 12 | 0.109        |
| Diuretics                      | 6 (46.2%)  | 13 | 10 (83.3%)  | 12 | 0.053        |
| Lipid-lowering drugs           | 10 (76.9%) | 13 | 10 (83.3%)  | 12 | 0.689        |
| Nitrates                       | 0 (0.0%)   | 13 | 0 (0.0%)    | 12 | N/A          |

Continuous variables are presented as mean±standard deviation for normal-distributed data or median and interquartile ranges. Categorical data are provided as number of patients (%). Continuous data were compared using unpaired Student's *t*-test or Mann-Whitney test for normal and non-normal data, respectively. Categorical data were compared using Chi-squared tests. N/A: not applicable. For other abbreviations see [Table S3](#).

**Table S10. Clinical characteristics of all patients providing left-atrial whole-tissue homogenates employed for Western blot experiments in this study.**

|                                | Ctl (n=7)  |   | cAF (n=6)  |   | P-value      |
|--------------------------------|------------|---|------------|---|--------------|
|                                | Value      | N | Value      | N | Value        |
| <b>Demographics</b>            |            |   |            |   |              |
| Age (years)                    | 81 (76-84) | 7 | 82 (81-83) | 6 | 0.807        |
| Female gender                  | 4 (57.1%)  | 7 | 4 (66.7%)  | 6 | 0.725        |
| BMI (kg / m <sup>2</sup> )     | 25 (24-29) | 7 | 25 (23-26) | 6 | 0.432        |
| <b>Indication for surgery</b>  |            |   |            |   |              |
| CAD                            | 0 (0.0%)   | 7 | 0 (0.0%)   | 6 | <b>0.048</b> |
| AVD/MVD                        | 2 (28.6%)  |   | 5 (83.3%)  |   |              |
| CAD+AVD/MVD                    | 5 (71.4%)  |   | 1 (16.7%)  |   |              |
| Other                          | 0 (0.0%)   |   | 0 (0.0%)   |   |              |
| <b>Medical history</b>         |            |   |            |   |              |
| Dyslipidemia                   | 3 (42.9%)  | 7 | 3 (50.0%)  | 6 | 0.797        |
| Diabetes                       | 2 (28.6%)  | 7 | 1 (16.7%)  | 6 | 0.612        |
| Hypertension                   | 4 (57.1%)  | 7 | 4 (66.7%)  | 6 | 0.725        |
| <b>Echocardiography</b>        |            |   |            |   |              |
| LA diameter (mm)               | 43 (42-44) | 6 | 48 (46-55) | 6 | <b>0.024</b> |
| LVEF (%)                       | 59 (57-61) | 7 | 59 (56-60) | 6 | 0.812        |
| Aortic valve insufficiency (%) | 2 (28.6%)  | 7 | 3 (50.0%)  | 6 | 0.429        |
| Mitral valve insufficiency (%) | 3 (42.9%)  | 7 | 5 (83.3%)  | 6 | 0.135        |
| <b>Medication</b>              |            |   |            |   |              |
| ACE inhibitors or ARBs         | 4 (57.1%)  | 7 | 4 (66.7%)  | 6 | 0.725        |
| Beta-blockers                  | 3 (42.9%)  | 7 | 5 (83.3%)  | 6 | 0.135        |
| Digitalis                      | 0 (0.0%)   | 7 | 2 (33.3%)  | 6 | 0.097        |
| Dihydropyridines               | 3 (42.9%)  | 7 | 1 (16.7%)  | 6 | 0.308        |
| Diuretics                      | 5 (71.4%)  | 7 | 5 (83.3%)  | 6 | 0.612        |
| Lipid-lowering drugs           | 2 (28.6%)  | 7 | 2 (33.3%)  | 6 | 0.853        |
| Nitrates                       | 0 (0.0%)   | 7 | 0 (0.0%)   | 6 | N/A          |

Continuous variables are presented as mean±standard deviation for normal-distributed data or median and interquartile ranges. Categorical data are provided as number of patients (%). Continuous data were compared using unpaired Student's *t*-test or Mann-Whitney test for normal and non-normal data, respectively. Categorical data were compared using Chi-squared tests. N/A not applicable. For other abbreviations see [Table S3](#).

**Table S11. Clinical characteristics of all patients providing paired right- and left-atrial tissue slices employed for immunocytochemistry in this study.**

|                                | Ctl (n=5)  |   | cAF (n=3)  |   | P-value |
|--------------------------------|------------|---|------------|---|---------|
|                                | Value      | N | Value      | N | Value   |
| <b>Demographics</b>            |            |   |            |   |         |
| Age (years)                    | 74 (72-79) | 5 | 71 (70-76) | 3 | 0.786   |
| Female gender                  | 1 (20.0%)  | 5 | 1 (33.3%)  | 3 | 0.673   |
| BMI (kg / m <sup>2</sup> )     | 29 (25-29) | 5 | 28 (26-30) | 3 | 0.786   |
| <b>Indication for surgery</b>  |            |   |            |   |         |
| CAD                            | 1 (20.0%)  | 5 | 0 (0.0%)   | 3 | 0.641   |
| AVD/MVD                        | 2 (40.0%)  |   | 2 (66.7%)  |   |         |
| CAD+AVD/MVD                    | 2 (40.0%)  |   | 1 (33.3%)  |   |         |
| Other                          | 0 (0.0%)   |   | 0 (0.0%)   |   |         |
| <b>Medical history</b>         |            |   |            |   |         |
| Dyslipidemia                   | 1 (20.0%)  | 5 | 2 (66.7%)  | 3 | 0.187   |
| Diabetes                       | 1 (20.0%)  | 5 | 0 (0.0%)   | 3 | 0.408   |
| Hypertension                   | 2 (40.0%)  | 5 | 2 (66.7%)  | 3 | 0.465   |
| <b>Echocardiography</b>        |            |   |            |   |         |
| LA diameter (mm)               | 43 (42-43) | 5 | 46 (46-53) | 3 | 0.125   |
| LVEF (%)                       | 59 (52-61) | 5 | 57 (49-62) | 3 | 0.875   |
| Aortic valve insufficiency (%) | 3 (60.0%)  | 5 | 2 (66.7%)  | 3 | 0.850   |
| Mitral valve insufficiency (%) | 2 (40.0%)  | 5 | 1 (33.3%)  | 3 | 0.850   |
| <b>Medication</b>              |            |   |            |   |         |
| ACE inhibitors or ARBs         | 2 (40.0%)  | 5 | 1 (33.3%)  | 3 | 0.850   |
| Beta-blockers                  | 3 (60.0%)  | 5 | 2 (66.7%)  | 3 | 0.850   |
| Digitalis                      | 0 (0.0%)   | 5 | 0 (0.0%)   | 3 | N/A     |
| Dihydropyridines               | 1 (20.0%)  | 5 | 0 (0.0%)   | 3 | 0.408   |
| Diuretics                      | 4 (80.0%)  | 5 | 1 (33.3%)  | 3 | 0.187   |
| Lipid-lowering drugs           | 2 (40.0%)  | 5 | 1 (33.3%)  | 3 | 0.850   |
| Nitrates                       | 0 (0.0%)   | 5 | 0 (0.0%)   | 3 | N/A     |

Continuous variables are presented as mean±standard deviation for normal-distributed data or median and interquartile ranges. Categorical data are provided as number of patients (%). Continuous data were compared using unpaired Student's *t*-test or Mann-Whitney test for normal and non-normal data, respectively. Categorical data were compared using Chi-squared tests. N/A not applicable. For other abbreviations see [Table S3](#).

**Table S12. Clinical characteristics of all patients providing right-atrial whole-tissue homogenates employed for the heart failure sub-study.**

|                                | Ctl (n=11) |    | HFrEF-SR (n=12) |    | HFrEF-cAF (n=8) |   | P-value      |
|--------------------------------|------------|----|-----------------|----|-----------------|---|--------------|
|                                | Value      | N  | Value           | N  | Value           | N |              |
| <b>Demographics</b>            |            |    |                 |    |                 |   |              |
| Age (years)                    | 69.4±7.80  | 11 | 62.6±12.2       | 12 | 72.0±6.16       | 8 | 0.102        |
| Female gender                  | 6 (54.5%)  | 11 | 3 (25.0%)       | 12 | 2 (25.0%)       | 8 | 0.259        |
| BMI (kg / m <sup>2</sup> )     | 26 (25-33) | 9  | 28 (26-34)      | 6  | 28 (23-32)      | 6 | 0.903        |
| <b>Indication for surgery</b>  |            |    |                 |    |                 |   |              |
| CAD                            | 2 (18.2%)  | 11 | 4 (36.4%)       | 11 | 1 (12.5%)       | 8 | 0.166        |
| AVD/MVD                        | 8 (72.7%)  |    | 3 (27.3%)       |    | 7 (87.5%)       |   |              |
| CAD+AVD/MVD                    | 1 (9.1%)   |    | 3 (27.3%)       |    | 0 (0.0%)        |   |              |
| Other                          | 0 (0.0%)   |    | 1 (9.1%)        |    | 0 (0.0%)        |   |              |
| <b>Medical history</b>         |            |    |                 |    |                 |   |              |
| Dyslipidemia                   | 6 (60.0%)  | 10 | 6 (66.7%)       | 9  | 2 (28.6%)       | 7 | 0.280        |
| Diabetes                       | 3 (27.3%)  | 11 | 1 (14.3%)       | 7  | 3 (37.5%)       | 8 | 0.599        |
| Hypertension                   | 8 (72.7%)  | 11 | 6 (66.7%)       | 9  | 4 (50.0%)       | 8 | 0.584        |
| <b>Echocardiography</b>        |            |    |                 |    |                 |   |              |
| LA diameter (mm)               | 37.75±3.70 | 8  | 42.67±3.94      | 9  | 46.63±5.72      | 8 | <b>0.005</b> |
| LVEF (%)                       | 65 (61-68) | 11 | 35 (32-35)      | 12 | 32 (29-35)      | 8 | <b>0.001</b> |
| Aortic valve insufficiency (%) | 5 (55.6%)  | 9  | 1 (33.3%)       | 3  | 4 (57.1%)       | 7 | 0.765        |
| Mitral valve insufficiency (%) | 2 (33.3%)  | 6  | 4 (80.0%)       | 5  | 5 (62.5%)       | 8 | 0.279        |
| <b>Medication</b>              |            |    |                 |    |                 |   |              |
| ACE inhibitors or ARBs         | 8 (72.7%)  | 11 | 8 (66.7%)       | 12 | 4 (57.1%)       | 7 | 0.792        |
| Beta-blockers                  | 7 (63.6%)  | 11 | 11 (91.7%)      | 12 | 4 (57.1%)       | 7 | 0.171        |
| Digitalis                      | 0 (0.0%)   | 11 | 0 (0.0%)        | 11 | 1 (14.3%)       | 7 | 0.196        |
| Dihydropyridines               | 2 (18.2%)  | 11 | 1 (9.1%)        | 11 | 0 (0.0%)        | 7 | 0.460        |
| Diuretics                      | 5 (45.5%)  | 11 | 8 (66.7%)       | 12 | 4 (57.1%)       | 7 | 0.591        |
| Lipid-lowering drugs           | 8 (72.7%)  | 11 | 7 (58.3%)       | 12 | 3 (42.9%)       | 7 | 0.446        |
| Nitrates                       | 0 (0.0%)   | 11 | 0 (0.0%)        | 11 | 0 (0.0%)        | 7 | N/A          |

Continuous variables are presented as mean±standard deviation for normal-distributed data or median and interquartile ranges. Categorical data are provided as number of patients (%). Continuous data were compared using one-way ANOVA or Kruskal-Wallis test for normal and non-normal data, respectively. Categorical data were compared using Chi-squared tests. N/A not applicable. For other abbreviations see [Table S3](#).



**Table S13. Association between clinical variables and primary outcomes.**

| Parameter                       | Source                                      | Clinical variable |       |       |       |          |           |
|---------------------------------|---------------------------------------------|-------------------|-------|-------|-------|----------|-----------|
|                                 |                                             | Age               | Sex   | LAD   | MVI   | Diuretic | Digitalis |
| KCNN1 mRNA                      | RA homogenates<br>(Figure S12)              | 0.62              | 0.110 | 0.440 | N/A   | 0.630    | 0.374     |
| KCNN2 mRNA                      |                                             | 0.712             | 0.731 | 0.672 | N/A   | 0.722    | 0.170     |
| KCNN3 mRNA                      |                                             | 0.573             | 0.302 | 0.255 | N/A   | 0.262    | 0.953     |
| KCNN1 mRNA                      | RA cardiomyocytes<br>(Figure S14)           | 0.444             | 0.273 | 0.672 | N/A   | 0.035    | N/A       |
| KCNN2 mRNA                      |                                             | 0.720             | 0.740 | 0.192 | N/A   | 0.931    | N/A       |
| KCNN3 mRNA                      |                                             | 0.518             | 0.984 | 0.649 | N/A   | 0.847    | N/A       |
| SK1 protein                     | RA homogenates<br>(Figure S13)              | 0.704             | 0.783 | 0.042 | 0.127 | 0.469    | 0.270     |
| SK2 protein                     |                                             | 0.760             | 0.476 | 0.090 | 0.767 | 0.767    | 0.929     |
| SK3 protein                     |                                             | 0.600             | 0.110 | 0.600 | 0.011 | 0.123    | 0.664     |
| SK1 protein                     | LA homogenates<br>(Figure S13)              | N/A               | 0.628 | N/A   | N/A   | 0.869    | 0.999     |
| SK2 protein                     |                                             | N/A               | 0.670 | N/A   | N/A   | 0.744    | 0.999     |
| SK3 protein                     |                                             | N/A               | 0.288 | N/A   | N/A   | 0.0043   | 0.200     |
| SK1 protein                     | RA cardiomyocytes<br>(Figure 2C)            | 0.645             | 0.467 | 0.182 | 0.517 | 0.682    | 0.229     |
| SK2 protein                     |                                             | 0.913             | 0.027 | 0.262 | 0.488 | 0.362    | 0.778     |
| SK3 protein                     |                                             | 0.899             | 0.194 | 0.031 | 0.957 | 0.228    | 0.229     |
| SK2 mem / cyt                   | RA tissue slices<br>(Figure 3)              | 0.302             | 0.395 | N/A   | 0.495 | 0.052    | N/A       |
| SK3 mem / cyt                   |                                             | 0.242             | 0.687 | N/A   | 0.559 | 0.311    | N/A       |
| SK2 mem / cyt                   | LA tissue slices<br>(Figure 3)              | 0.617             | 0.476 | N/A   | 0.215 | 0.291    | N/A       |
| SK3 mem / cyt                   |                                             | 0.138             | 0.302 | N/A   | 0.316 | 0.633    | N/A       |
| SK1 mem / cyt                   | RA cardiomyocytes<br>(Figure 4; Figure S19) | N/A               | 0.822 | N/A   | N/A   | 0.597    | N/A       |
| SK2 mem / cyt                   |                                             | N/A               | 0.713 | N/A   | N/A   | 0.530    | N/A       |
| SK3 mem / cyt                   |                                             | N/A               | 0.614 | N/A   | N/A   | 0.999    | 0.122     |
| PP2Ac                           | LA homogenates<br>(Figure S22)              | N/A               | 0.389 | N/A   | N/A   | 0.728    | 0.800     |
| PP2Ac                           | RA cardiomyocytes<br>(Figure 6D)            | 0.563             | 0.799 | 0.519 | 0.503 | 0.724    | 0.012     |
| CaM-Total                       | RA homogenates<br>(Figure S21)              | 0.762             | 0.848 | 0.782 | 0.387 | 0.495    | 0.234     |
| CaM-Thr80-P/Total               |                                             | 0.373             | 0.505 | 0.400 | 0.275 | 0.343    | 0.731     |
| CaM-Total                       | LA homogenates<br>(Figure S22)              | N/A               | 0.710 | N/A   | N/A   | 0.940    | 0.200     |
| CaM-Thr80-P/Total               |                                             | N/A               | 0.286 | N/A   | N/A   | 0.644    | 0.200     |
| CaM-Total                       | RA cardiomyocytes<br>(Figure 6C)            | 0.505             | 0.509 | 0.707 | 0.590 | 0.107    | 0.935     |
| CaM-Thr80-P/Total               |                                             | 0.328             | 0.174 | 0.082 | 0.857 | 0.891    | 0.683     |
| ISK (+30 mV) - Per Patient      | RA cardiomyocytes<br>(Figure 1D)            | 0.432             | 0.654 | N/A   | N/A   | 0.799    | 0.999     |
| Apamin-induced APD prolongation | RA cardiomyocytes<br>(Figure 1F)            | 0.542             | N/A   | N/A   | N/A   | N/A      | 0.473     |

P-values for two-way ANOVA analyses with factors rhythm status (Ctl vs. cAF) and either age (<72 vs. ≥72 years), sex (male vs. female), left-atrial diameter (LAD; <43 vs. ≥43 mm), mitral valve insufficiency (MVI; yes/no), or diuretics use (no vs. yes) are shown for mRNA and protein levels of SK-channel subunits, their membrane localization, regulators of calmodulin, and SK-channel current ( $I_{SK}$ ). P-values for digitalis are based on Mann-Whitney tests between cAF patients on

digitalis compared to cAF patients without digitalis. P-values are not corrected for multiple comparisons and results should be considered hypothesis generating. P=N/A indicates the inability to perform two-way ANOVA because there are not enough patients in one of the four combinations of rhythm and clinical status. The statistically significant associations are highlighted in orange and are shown in [Figures S28 through S30](#).

## Experimental Methods

### *Whole-cell patch-clamp recordings*

Standard patch-clamp recording techniques were used to measure currents in the whole-cell configuration. Patch electrodes were pulled from borosilicate glass capillaries (MTW 150F; world Precision Instruments, Inc., Sarasota, FL) using a DMZ-Universal Puller (Zeitz-Instrumente Vertriebs GmbH, Martinsried, Germany) and filled with pre-filtered pipette solution. Currents or action potentials (APs) were recorded at room temperature with an EPC-8 amplifier (HEKA Elektronik, Lambrecht, Germany) connected via a 16 bit A/D interface to a computer. The signals were low-pass filtered (1 kHz) before 5 kHz digitization. Data acquisition and analysis were performed with an ISO-3 multitasking patch-clamp program (MFK M. Friedrich, Niedernhausen, Germany). Pipette resistance ranged from 2-3 M $\Omega$ . Electrode offset potentials were always zero-adjusted before a G $\Omega$ -seal was formed. After a G $\Omega$ -seal was obtained, the membrane under the pipette tip was ruptured by negative pressure and the whole-cell configuration was established. In voltage-clamp but not in current-clamp recordings, the membrane capacitance and series resistance were compensated (60-80%).

Whole-cell currents were elicited by applying 300-ms step pulses to potentials ranging from -120 mV to +80 mV in 10-mV increments from a holding potential of -50 mV. The whole-cell currents were measured at the end of each pulse, normalized to cell capacitance to obtain the current density (pA/pF) and plotted versus the respective voltages, yielding the activation (I/V) curves of channels in the cell. APs were elicited in current-clamp mode with a holding current of -40 pA by injection of brief current pulses (2 ms, 1 nA). In a subset of experiments, stable currents or APs were first recorded with the aforementioned protocols at 0.2 Hz (baseline). Then, the patched cells were stimulated in voltage-clamp mode by AP-like pulses at 5 Hz for 10 mins. Thereafter, the stimulation protocol was changed back to the control protocol at 0.2 Hz and currents or APs were recorded with the same protocol at the same frequency (0.2 Hz) as in baseline recordings to eliminate any direct effects of frequency on channel gating.

In whole-cell current measurements and AP recordings, the bath was superfused with (in mmol/L): 130 NaCl, 5.9 KCl, 2.4 CaCl<sub>2</sub>, 1.2 MgCl<sub>2</sub>, 11 glucose, 10 HEPES, pH 7.4 with NaOH. The pipette solution contained (in mmol/L) 126 KCl, 6 NaCl, 1.2 MgCl<sub>2</sub>, 5 EGTA, 11 glucose, 1 MgATP, 0.1 Na<sub>3</sub>GTP, and 10 HEPES adjusted to pH 7.4 with KOH, free-Ca<sup>2+</sup> 500 nmol/L.

### *Quantitative real-time or digital polymerase chain reaction*

Total RNA was isolated from RA appendages or RA cardiomyocytes from Ctl and cAF patients using the RNeasy Mini Kit (Qiagen, Hilden, Germany) according to the manufacturer's instructions, after disrupting the tissue with the tissue lyser LT (Qiagen, Hilden, Germany). Subsequently, the mRNA in 1  $\mu$ g of total RNA was transcribed into cDNA using the reverse transcription kit (Applied Biosystems; Thermo Fisher Scientific, Waltham, MA) according to the manufacturer's instructions. Quantitative polymerase chain reaction was performed with TaqMan probes and primers from Applied Biosystems; Thermo Fisher Scientific for *KCNN1* (Hs00158457\_m1), *KCNN2* (Hs00222059\_m1), and *KCNN3* (Hs01546821\_m1), as well as the

housekeeping genes hydroxymethylbilane synthase (*HMBS*; Hs00609296\_g1), beta-2-microglobulin (*B2M*, Hs99999907\_m1) and GATA binding protein 4 (*GATA4*; Hs00171403\_m1). Reactions were run on a Pikoreal 96 (Thermo Fisher Scientific, Waltham, MA) using the following conditions: 2 minutes at 50°C, followed by 10 minutes at 95°C, a total of 45 cycles (15 sec at 95°C and 1 minute at 60°C), and 30 sec at 60°C. Relative gene expression values were calculated by the 2<sup>Δ</sup>DCt method as described.<sup>30</sup>

Alternatively, 140 ng RNA was transcribed into cDNA using the reverse transcription kit (Applied Biosystems; Thermo Fisher Scientific, Waltham, MA) according to the manufacturer's instructions. Digital polymerase chain reaction (dPCR) was carried out with TaqMan probes from Thermo Fisher Scientific for *KCNN1* (Hs01109326\_m1), *KCNN2* (Hs00222059\_m1), and *KCNN3* (Hs01546821\_m1) and the aforementioned primers for the housekeeping genes *HMBS*, *B2M* and *GATA4*. cDNA dilution of 1:1 was used for *KCNN1*, *KCNN2*, *KCNN3*, *HMBS*, as well *GATA4* and 1:10 for *B2M*. The reactions were run on a QIAcuity Digital PCR System (Qiagen, Hilden, Germany) using a 96-well Nanoplate with 8500 partitions and the QIAcuity master mix according to the manufacturer's instructions. The cycling program used for the reactions consisted of 2 minutes at 50°C, followed by 10 minutes at 95°C, a total of 35 cycles (15 seconds at 95°C and 1 minute at 60°C), and 30 sec at 60°C. The relative mRNA levels to controls were calculated from the copies/μl values and normalized to *HMBS*, *B2M* and *GATA*.

### *Co-immunoprecipitation and immunoblot*

Human RA or LA whole-tissue lysates or human RA cardiomyocyte fractions were subjected to electrophoresis on acrylamide gels, followed by transfer onto polyvinyl difluoride (PVDF) membranes. Co-immunoprecipitation and immunoblotting were performed according to standard procedures, as described,<sup>31-33</sup> using the primary antibodies listed in the [Major Resources Table](#). Appropriate peroxidase-conjugated (1:20,000, Santa-Cruz Biotechnology, Dallas, TX, or Merck Sigma-Aldrich, Darmstadt, Germany) or near-infrared fluorophore dyes (IRDye, all 1:20,000, LI-COR Biosciences, Lincoln, NE) were employed as secondary antibodies and imaged with a ChemoCam Imager (Intas Science Imaging Instruments, Göttingen, Germany) or an Odyssey Infrared Imaging System (LI-COR Biosciences). Protein expression was normalized to GAPDH for whole-tissue homogenates or to troponin-C for cardiomyocytes.

### *Immunostaining*

#### *Human atrial tissue slices*

Human LA and RA appendages from Ctl or cAF patients were snap frozen and stored in liquid nitrogen until further use. Prior to sectioning, the tissue was placed in Tissue-Tek® medium (Sakara Fintek, Alphen aan den Rijn, The Netherlands) and sectioned in 10 μm thick slices on a cryostat setup (Leica CM3050S, Leica Microsystems, Wetzlar, Germany). Cryosections were air-dried for 30 min and rehydrated for 10 min in 1x phosphate-buffered saline (PBS) before they were fixed in 4% paraformaldehyde (PFA) for 20 min. The sections were then blocked with 2% bovine serum albumin (BSA) and 2.2% glycine in 1xPBS and incubated at 4°C overnight in blocking buffer with the primary rabbit polyclonal SK2 (APC-028, 1:200) or SK3 (APC-039, 1:200)

antibodies (Alomone, Jerusalem, Israel) and conjugated Wheat Germ Agglutinin (WGA)-AF350 (Invitrogen, W11263, 1:500) to visualize the cellular membrane. Thereafter, the sections were washed in 1xPBS and incubated for 1 hour at room temperature with secondary antibody Cy5 (111-175-144, Jackson ImmunoResearch, West Grove, PA, 1:200). After washing with 1xPBS, the sections were mounted on coverslips with aqueous mounting medium (Abcam, ab128982). The slices were imaged using Keyence BZ-X800E at 40x magnification and 2-6 frames per section were acquired.

For analyses, the images were imported in Fiji ([www.fiji.sc](http://www.fiji.sc)), an extended version of ImageJ. Only transversely sectioned cardiomyocytes with intact membrane morphology within a given frame were chosen for analysis. Partial or incomplete cardiomyocytes were not included in the analysis. The membrane regions and the cytosolic regions of each cell selected for analysis were traced based on the WGA staining (**Figure S16**). Thereafter, the mean membrane intensity and the mean cytosolic intensity of the SK2 and SK3 signal was analyzed based on these regions (**Figure S16**). Results are shown in **Figure 3**. Background staining was assessed in human atrial tissue slices by incubation with the secondary antibody in absence of the primary antibody. Subsequent imaging did not reveal any unspecific background staining, as shown for a representative example in **Figure S16B**.

#### Human atrial cardiomyocytes

For immunostaining of RA cardiomyocytes (**Figure 4; Figure S19**), cells were fixed with 2% PFA for 15 min in a 15 ml plastic tube. After centrifugation for 5 min at 700 rpm, PFA was removed and the myocytes were washed and PFA was neutralized with Glycine 0.1 mol/L for 10 min. Cells were washed 3 times with PBS and permeabilized with Triton X-100 diluted in PBS (0.2%, 15 min). Cells were rinsed 3 times with PBS and blocked with a PBS solution containing 1% BSA for 40 min. Double-labelling was obtained by incubating the myocytes overnight at 4°C with the primary antibodies diluted in PBS containing 10% goat serum and 0.25% Triton X-100: mouse monoclonal anti- $\alpha$ -actinin (1:1000 dilution) and rabbit polyclonal SK1 (APC-039, 1:200 dilution), SK2 (APC-028, 1:200 dilution), or SK3 (APC-025, 1:200 dilution). Cardiomyocytes were subsequently rinsed 3 times with 1% BSA in PBS (5 min). The cells were then incubated with AlexaFluor® 488 conjugate anti-rabbit IgG to reveal SK channels and AlexaFluor® 633 anti-mouse IgG to reveal the  $\alpha$ -actinin. After 3 successive washes with PBS/BSA for 5 min and centrifugation (700 rpm, 5 min), the cells were resuspended in Mowiol mounting medium (15  $\mu$ L), placed on a slide and carefully covered with a coverslip avoiding air bubbles. The coverslip was then secured on the slide with nail polish and examined with a Carl Zeiss (Oberkochen, Germany) LSM 710 confocal scanning laser microscope. Optical sections series were obtained with a Plan Aplanachromat 63x objective (NA 1.4, oil immersion). Background staining in human atrial cardiomyocytes was assessed using only the secondary antibody.

For immunostaining of RA cardiomyocytes after electrical field stimulation (**Figure 8; Figure S27**), circular coverslips (11 mm) were laminin coated (20 $\mu$ g/ml in water, 90 min at room temperature) in 6-well cell culture plates and washed 3 times with bath solution containing (in mmol/L): NaCl 140, HEPES 10, KCl 4, MgCl<sub>2</sub> 1, CaCl<sub>2</sub> 2, glucose 10. Freshly isolated human RA cardiomyocytes from Ctl patients were allowed to settle for 1 hour on the coverslips supplied with 150  $\mu$ l bath

solution each. Subsequently, 3 ml bath solution was added per well and the cells were field stimulated at 0.2 Hz or 5 Hz (C-Pace EM & C-Dish, 6-well corning; Ionoptix) for 10 minutes and fixed immediately after stimulation with 3.7% PFA. After removal of PFA and washing (3x PBS), cardiomyocytes were permeabilized with 0.1 % Triton X-100 in PBS for 10 minutes. After further washing steps (3x PBS), cardiomyocytes were blocked with 10% Roti-Block (Roth) in PBS and incubated with 1:250 diluted primary antibodies in PBS (SK1: APC-039, Alomone; SK2: APC-028, Alomone; SK3: APC-025, Alomone; Alpha-Actinin: A7811, Sigma) over night at 4°C. Coverslips were then washed 3x with PBS+0.2% Tween20 (PBST) and incubated with FITC- and Cy5-coupled secondary antibodies (11-4614-80, Thermo Fisher; and SBA-1031-15, Dianova Biozol, respectively) diluted 1:250 in PBS for 2 hours at room temperature and washed again 3 times with PBST and 1 time with PBS. The sample coverslips were supplied with 5.5µl mounting medium (ab104139, Abcam), placed on glass slides and insulated with nail polish. The fluorescence signals of individual cells in FITC-, Cy5- and DAPI-channel as well as a brightfield cell image was acquired using a epifluorescence (BZ-X810, Keyence) or a Carl Zeiss (Oberkochen, Germany) LSM 710 confocal scanning laser microscope.

## Computational Modeling

We developed updated computational models of Ctl and cAF human atrial cardiomyocytes based on the framework of the Grandi et al. model,<sup>34</sup> previously modified to reproduce Na<sup>+</sup>-dependent regulation of I<sub>K1</sub> and I<sub>K,Ach</sub>.<sup>35</sup> Here, we integrated into this cellular framework a previously published model of I<sub>K2P</sub><sup>36</sup> and a novel formulation of I<sub>SK</sub>.

### *Mathematical model of I<sub>SK</sub>*

The new I<sub>SK</sub> formulation was based on published data and our new experimental data collected in this study. In our cellular model, the total I<sub>SK</sub> current is the sum of two components, one carried by SK channels located in the junctional space (junc) and one carried by SK channels located in the subsarcolemmal space (sl):

$$I_{SK} = I_{SK,junc} + I_{SK,sl}$$

Each component is calculated multiplying the fraction of SK channels in each compartment ( $F_{junc} = 0.11$ ;  $F_{sl} = 0.89$ ), the maximal conductance  $G_{SK}$ , a function describing the Ca<sup>2+</sup>-dependent activation ( $F_{Ca}$ ), a function integrating voltage-dependent properties ( $F_{Vm}$ ), and the driving force (i.e., the difference between the voltage potential  $V_m$  and the Nernst potential for K<sup>+</sup> ions  $E_K$ ):

$$I_{SK,junc} = F_{junc} * G_{SK} * F_{Ca,junc} * F_{Vm} * (V_m - E_K)$$
$$I_{SK,sl} = F_{sl} * G_{SK} * F_{Ca,sl} * F_{Vm} * (V_m - E_K)$$

$F_{Vm}$ , common to both components, is calculated as follows:

$$F_{Vm} = 0.273 / (1 + \exp((V_m - E_K + 2.964) * 0.2)) + 0.279 / (1 + \exp(-(V_m - E_K - 86.929) * 6.363e-3));$$

$F_{Ca}$  depends on the local Ca<sup>2+</sup> concentration in each compartment ( $[Ca^{2+}]_{junc}$  and  $[Ca^{2+}]_{sl}$ ):

$$F_{Ca,junc} = 1 / (1 + \exp((\log_{10}(K_{d,SK}) - \log_{10}([Ca^{2+}]_{junc})) / 0.3));$$
$$F_{Ca,sl} = 1 / (1 + \exp((\log_{10}(K_{d,SK}) - \log_{10}([Ca^{2+}]_{sl})) / 0.3));$$

where the SK apparent affinity for Ca<sup>2+</sup> ( $K_{d,SK}$ ) was set to 355 nmol/L, in agreement with published observations in rabbit and rat ventricular cardiomyocytes<sup>63,64</sup> and dog atrial cardiomyocytes.<sup>7</sup> The SK maximal conductance ( $G_{SK}$ ) and gating parameters were fitted to reproduce the I<sub>SK</sub>-voltage relationships experimentally observed in human Ctl and cAF myocytes with  $[Ca^{2+}]_i$  clamped to 500 nmol/L (**Figure S4**). Note that  $G_{SK}$  is the only parameter that changes between the Ctl and cAF I<sub>SK</sub> parameterizations ( $G_{SK} = 0.051$  mS/ $\mu$ F in Ctl and  $G_{SK} = 0.265$  mS/ $\mu$ F in cAF). All other parameters are unchanged.

### *Other model parameter adjustments*

After including the I<sub>K2P</sub> and I<sub>SK</sub> formulations, we made the following adjustments to the nSR and cAF cellular models:

- the conductance of the fast Na<sup>+</sup> current was increased by 15% to increase the maximal upstroke velocity in both Ctl and cAF models;

- the late Na<sup>+</sup> current was added to the Ctl model;
- the conductance of the background Cl<sup>-</sup> current was reduced by 25% in Ctl & cAF models;
- the extent of cAF-induced remodeling on the transient-outward and the ultrarapid delayed-rectifier K<sup>+</sup> currents ( $I_{to}$  and  $I_{Kur}$ ) was modified to match experimental data.<sup>65</sup>

Moreover, we made the following modifications to reproduce higher diastolic Ca<sup>2+</sup> in cAF vs nSR, with no changes in the sarcoplasmic reticulum Ca<sup>2+</sup> loading.<sup>39,66</sup>

- the conductance of the background Ca<sup>2+</sup> current ( $I_{CaB}$ ) was increased by 50% in the cAF vs Ctl model;
- the maximal SERCA transport rate was decreased by 25% in cAF vs Ctl;
- the SERCA  $K_{mf}$  was increased by 25% in cAF vs Ctl (i.e., SERCA affinity for cytosolic Ca<sup>2+</sup> was reduced in cAF vs Ctl);
- the parameter  $ec50SR$  was increased by 25% to increase the RyR sensitivity to luminal Ca<sup>2+</sup> in cAF vs Ctl.

### *Global parameter optimization*

The parameters of the updated whole-cell model were fitted using a parameter optimization routine<sup>67</sup> to recapitulate experimentally observed data describing frequency-dependence of AP and Ca<sup>2+</sup>-transient properties measured in Ctl and cAF human myocytes, and prolongation induced by complete block of  $I_{SK}$  (with  $[Ca^{2+}]_i$  clamped to 500 nM) or  $I_{K2P}$  at 0.2 Hz. The routine uses the Nelder-Mead algorithm to minimize the error function comparing simulated and experimental outcomes, and determines the optimal combination of parameter scaling factors for the Ctl and cAF cellular models (**Figure S5**). Targets of model optimizations are reported in **Table S14**, while the resulting scaling factors are shown in **Table S15**.

### *Model validation*

The Ctl and cAF models were validated against an independent data set describing the degree of AP shortening induced by nifedipine administration at different pacing rates<sup>68</sup> (**Figure S9**). Nifedipine administration was simulated by reducing the maximal conductance of the L-type Ca<sup>2+</sup> channel by 50%.

### *Analysis*

The optimized Ctl and cAF models were used to assess the consequences of  $I_{SK}$  block at different pacing rates while simulating physiologic oscillations in cytosolic Ca<sup>2+</sup>. Parameter sensitivity analysis was performed using an established population-based approach<sup>37</sup> to assess the influence of small variations in several model parameters (including  $G_{SK}$  and  $K_{d,SK}$ ) on model outcomes. Briefly, we generated two populations of 1000 Ctl and cAF myocytes by randomly varying the parameters indicated in **Table S15**. For each trial, the baseline value of each parameter was independently varied with a log-normal distribution ( $\sigma = 0.1$ ), and model outputs were assessed after 300-s pacing at 1 Hz. When creating a population with  $\sigma = 0.1$ , 95% of



perturbed parameters are within 82 to 122% of the value present in the baseline model. Multivariable regression (non-linear iterative partial least squares method) on log-transformed values was used to correlate the variation in each parameter to the consequent effect on APD<sub>50</sub>, APD<sub>90</sub> and RMP in the two populations of Ctl and cAF models. In particular, a regression coefficient can be used to predict the value of each AP feature in response to a known perturbation in the baseline value of the model parameter. For example,  $APD_{90} = APD_{90,baseline} * x^b$ ; where b is the value of the regression coefficient, APD<sub>90,baseline</sub> is the value of the feature estimated in the baseline model, and x is the scaling factor that describes the change in the parameter with respect to the baseline value (e.g.,  $G_{to} = x * G_{to,baseline}$ ).

**Table S14. Targets of global optimization routine.**

| Target                                                                    | Value                                                                                              | Notes                                                               |
|---------------------------------------------------------------------------|----------------------------------------------------------------------------------------------------|---------------------------------------------------------------------|
| <b>APD (absolute values)</b>                                              |                                                                                                    |                                                                     |
| 1                                                                         | APD <sub>90</sub> Ctl @ 0.2 Hz                                                                     | Estimated from different papers (see <a href="#">Figure S6</a> )    |
| 2                                                                         | APD <sub>90</sub> Ctl @ 3 Hz                                                                       |                                                                     |
| 3                                                                         | APD <sub>90</sub> cAF @ 0.2 Hz                                                                     |                                                                     |
| 4                                                                         | APD <sub>90</sub> cAF @ 3 Hz                                                                       |                                                                     |
| <b>ΔAPD (relative prolongation induced by channel block)</b>              |                                                                                                    |                                                                     |
| 5                                                                         | ΔAPD <sub>90</sub> Ctl @ 0.2 Hz with I <sub>K2P</sub> block                                        | Schmidt et al. 2015 <sup>36</sup>                                   |
| 6                                                                         | ΔAPD <sub>90</sub> cAF @ 0.2 Hz with I <sub>K2P</sub> block                                        |                                                                     |
| 7                                                                         | ΔAPD <sub>90</sub> Ctl @ 0.2 Hz with I <sub>SK</sub> block (w/ Ca <sup>2+</sup> clamped to 500 nM) | New data                                                            |
| 8                                                                         | ΔAPD <sub>90</sub> cAF @ 0.2 Hz with I <sub>SK</sub> block (w/ Ca <sup>2+</sup> clamped to 500 nM) |                                                                     |
| <b>Ca<sup>2+</sup> handling properties</b>                                |                                                                                                    |                                                                     |
| 9                                                                         | CaT <sub>amp</sub> Ctl @ 0.5 Hz                                                                    | Voigt et al. 2012 <sup>39</sup>                                     |
| 10                                                                        | CaT <sub>amp</sub> cAF @ 0.5 Hz                                                                    |                                                                     |
| 11                                                                        | CaT <sub>min</sub> Ctl @ 0.5 Hz                                                                    | Neef et al. 2010 <sup>66</sup> ,<br>Voigt et al. 2012 <sup>39</sup> |
| 12                                                                        | CaT <sub>min</sub> cAF @ 0.5 Hz                                                                    |                                                                     |
| 13                                                                        | [Ca <sup>2+</sup> ] <sub>SR,max</sub> Ctl @ 0.5 Hz                                                 | Neef et al. 2010 <sup>66</sup>                                      |
| 14                                                                        | [Ca <sup>2+</sup> ] <sub>SR,max</sub> cAF @ 0.5 Hz                                                 |                                                                     |
| <b>Relative contributions to Ca<sup>2+</sup> removal from the cytosol</b> |                                                                                                    |                                                                     |
| 15                                                                        | SERCA-to-NCX ratio Ctl @ 0.5 Hz                                                                    | Voigt et al. 2012 <sup>39</sup>                                     |
| 16                                                                        | SERCA-to-NCX ratio cAF @ 0.5 Hz                                                                    |                                                                     |
| <b>Other constrains</b>                                                   |                                                                                                    |                                                                     |
| 17                                                                        | RMP Ctl @ 0.5 Hz – RMP cAF @ 0.5 Hz                                                                | These additional constrains are needed to avoid unrealistic results |
| 18                                                                        | RMP Ctl @ 3 Hz – RMP cAF @ 3 Hz                                                                    |                                                                     |
| 19                                                                        | dV/dt <sub>max</sub> Ctl @ 0.5 Hz                                                                  |                                                                     |
| 20                                                                        | [Na <sup>+</sup> ] <sub>i</sub> Ctl @ 3 Hz                                                         |                                                                     |
| 21                                                                        | CaT <sub>amp</sub> Ctl @ 0.5 Hz / CaT <sub>amp</sub> Ctl @ 0.2 Hz                                  |                                                                     |

**Table S15. Results of global optimization routine.**

|    | <b>Parameter</b>             | <b>Definition</b>                                                                                                                             | <b>Lower boundary</b> | <b>Upper boundary</b> | <b>Scaling factor</b> |
|----|------------------------------|-----------------------------------------------------------------------------------------------------------------------------------------------|-----------------------|-----------------------|-----------------------|
| 1  | gNa <sup>#</sup>             | Fast Na <sup>+</sup> current, conductance                                                                                                     | 0.9                   | 1                     | 0.999                 |
| 2  | gNaL <sup>#</sup>            | Late Na <sup>+</sup> current, conductance                                                                                                     | 0.9                   | 1.1                   | 0.991                 |
| 3  | gNaB <sup>#</sup>            | Background Na <sup>+</sup> current, conductance                                                                                               | 0.9                   | 1.1                   | 0.996                 |
| 4  | vNaK <sup>#</sup>            | Na <sup>+</sup> /K <sup>+</sup> ATPase, rate                                                                                                  | 0.9                   | 1.1                   | 0.901                 |
| 5  | Gto <sup>#</sup>             | Transient-outward K <sup>+</sup> current, conductance                                                                                         | 0.33                  | 3                     | 1.935                 |
| 6  | GKr <sup>#</sup>             | Rapidly activating delayed-rectifier K <sup>+</sup> current, conductance                                                                      | 0.33                  | 3                     | 0.822                 |
| 7  | GKs <sup>#</sup>             | Slowly activating delayed-rectifier K <sup>+</sup> current, conductance                                                                       | 0.33                  | 3                     | 0.402                 |
| 8  | gKur <sup>#</sup>            | Ultrarapid delayed-rectifier K <sup>+</sup> current, conductance                                                                              | 0.33                  | 3                     | 0.560                 |
| 9  | GK1+GK,ACh,c <sup>#</sup>    | Total inward-rectifier K <sup>+</sup> current, conductance (comprising basal I <sub>K1</sub> and constitutively-active I <sub>K,ACh,c</sub> ) | 0.33                  | 3                     | 1.084                 |
| 10 | GKp <sup>#</sup>             | Plateau K <sup>+</sup> current, conductance                                                                                                   | 0.33                  | 3                     | 0.492                 |
| 11 | GK2P <sup>#</sup>            | Two-pore-domain K <sup>+</sup> current, conductance                                                                                           | 0.33                  | 3                     | 1.730                 |
| 12 | GSK <sup>#</sup>             | Small-conductance Ca <sup>2+</sup> -activated K <sup>+</sup> current, conductance                                                             | 0.33                  | 3                     | 0.460                 |
| 13 | KdSK <sup>#</sup>            | Small-conductance Ca <sup>2+</sup> -activated K <sup>+</sup> current, Ca <sup>2+</sup> -affinity                                              | 0.75                  | 1.25                  | 0.794                 |
| 14 | gClCa <sup>#</sup>           | Ca <sup>2+</sup> -activated Cl <sup>-</sup> current, conductance                                                                              | 0.5                   | 1.5                   | 0.505                 |
| 15 | GCIB <sup>#</sup>            | Background Cl <sup>-</sup> current, conductance                                                                                               | 0.5                   | 2                     | 1.788                 |
| 16 | gCaL <sup>#</sup>            | L-type Ca <sup>2+</sup> current, conductance                                                                                                  | 0.5                   | 1.5                   | 1.475                 |
| 17 | GCaB <sup>#</sup>            | Background Ca <sup>2+</sup> current, conductance                                                                                              | 0.5                   | 1                     | 0.998                 |
| 18 | vPMCA <sup>#</sup>           | Plasma membrane Ca <sup>2+</sup> ATPase, rate                                                                                                 | 0.5                   | 1.5                   | 0.572                 |
| 19 | vNCX <sup>#</sup>            | Na <sup>+</sup> /Ca <sup>2+</sup> exchanger, rate                                                                                             | 0.5                   | 1.5                   | 1.215                 |
| 20 | vSERCA <sup>#</sup>          | Sarcoplasmic reticulum Ca <sup>2+</sup> ATPase, rate                                                                                          | 0.5                   | 1.5                   | 0.894                 |
| 21 | Kmf                          | Sarcoplasmic reticulum Ca <sup>2+</sup> ATPase, Ca <sup>2+</sup> -affinity                                                                    | 0.5                   | 1.25                  | 0.907                 |
| 22 | vRel <sup>#</sup>            | Ryanodine receptor flux, rate                                                                                                                 | 0.5                   | 1.5                   | 0.967                 |
| 23 | vLeak <sup>#</sup>           | Ryanodine receptor Ca <sup>2+</sup> leak, rate                                                                                                | 0.5                   | 1.5                   | 0.726                 |
| 24 | GK2P <sub>(cAF vs nSR)</sub> | cAF-to-nSR ratio in GK2P                                                                                                                      | 0.5                   | 2                     | 1.892                 |

|    |                                |                                                                                   |      |     |       |
|----|--------------------------------|-----------------------------------------------------------------------------------|------|-----|-------|
| 25 | GSK <sub>(cAF vs nSR)</sub>    | cAF-to-nSR ratio in GSK                                                           | 0.5  | 2   | 1.053 |
| 26 | GCaB <sub>(cAF vs nSR)</sub>   | cAF-to-nSR ratio in GCaB                                                          | 0    | 3   | 2.919 |
| 27 | vNCX <sub>(cAF vs nSR)</sub>   | cAF-to-nSR ratio in vNCX                                                          | 0.75 | 2   | 0.986 |
| 28 | koCa <sub>(cAF vs nSR)</sub>   | cAF-to-nSR ratio in koCa,<br>parameter controlling ryanodine<br>receptor gating   | 0.25 | 2   | 0.290 |
| 29 | vSERCA <sub>(cAF vs nSR)</sub> | cAF-to-nSR ratio in vSERCA                                                        | 0    | 2   | 0.195 |
| 30 | Kmf <sub>(cAF vs nSR)</sub>    | cAF-to-nSR ratio in Kmf                                                           | 0    | 2   | 1.482 |
| 31 | ec50SR <sub>(cAF vs nSR)</sub> | cAF-to-nSR ratio in ec50SR,<br>parameter controlling ryanodine<br>receptor gating | 0    | 2   | 0.670 |
| 32 | GK1 <sub>(cAF vs nSR)</sub>    | cAF-to-nSR ratio in GK1                                                           | 0.5  | 1.5 | 1.468 |

# indicates parameters perturbed to create the populations of models (i.e., parameters 1-20, 22 and 23).

## Supplemental Figures

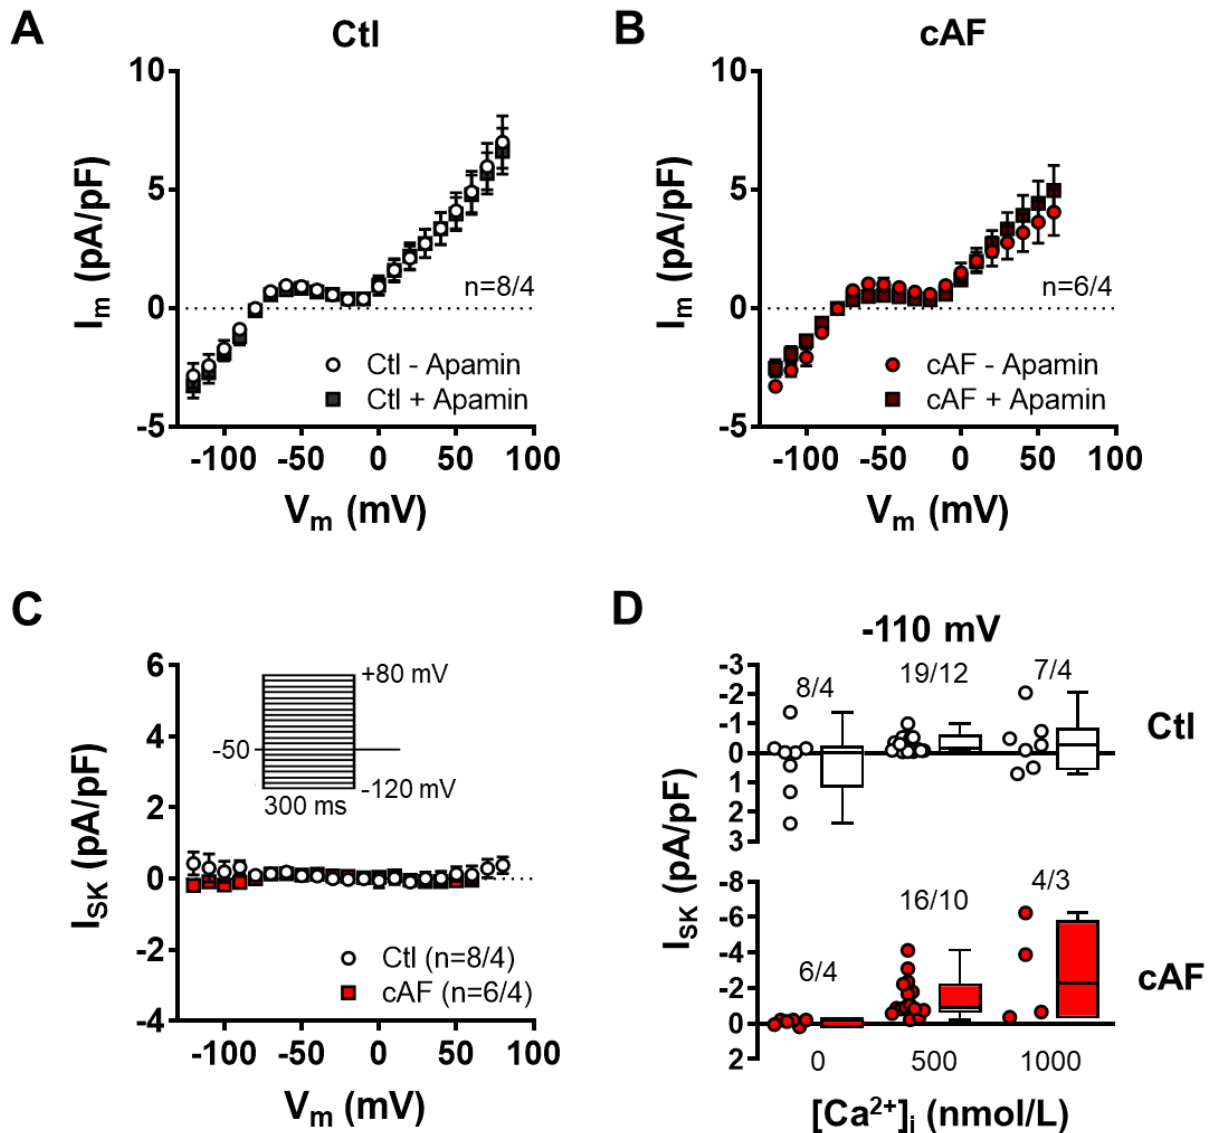

**Figure S1.  $Ca^{2+}$  dependence of small-conductance  $Ca^{2+}$ -activated  $K^+$ -current ( $I_{SK}$ ).** A-B, Total membrane current during 300-ms voltage-clamp steps to potentials from -120 mV to +80 mV in right-atrial (RA) Ctl- or cAF-cardiomyocytes in the absence (circles) or presence (black squares) of 100-nmol/L apamin in the presence of BAPTA-AM to chelate all free  $Ca^{2+}$ . C, Apamin-sensitive  $I_{SK}$  in Ctl (white symbols) or cAF (red symbols) RA-cardiomyocytes in the absence of intracellular  $[Ca^{2+}]_i$ . D, Apamin-sensitive  $I_{SK}$  at -110 mV in Ctl (top) or cAF (bottom) RA-cardiomyocytes in the presence of 0-nmol/L (data from panel C), 500-nmol/L (data from Figure 1) or 1000 nmol/L free  $Ca^{2+}$ . N-numbers indicate numbers of cardiomyocytes/patients.

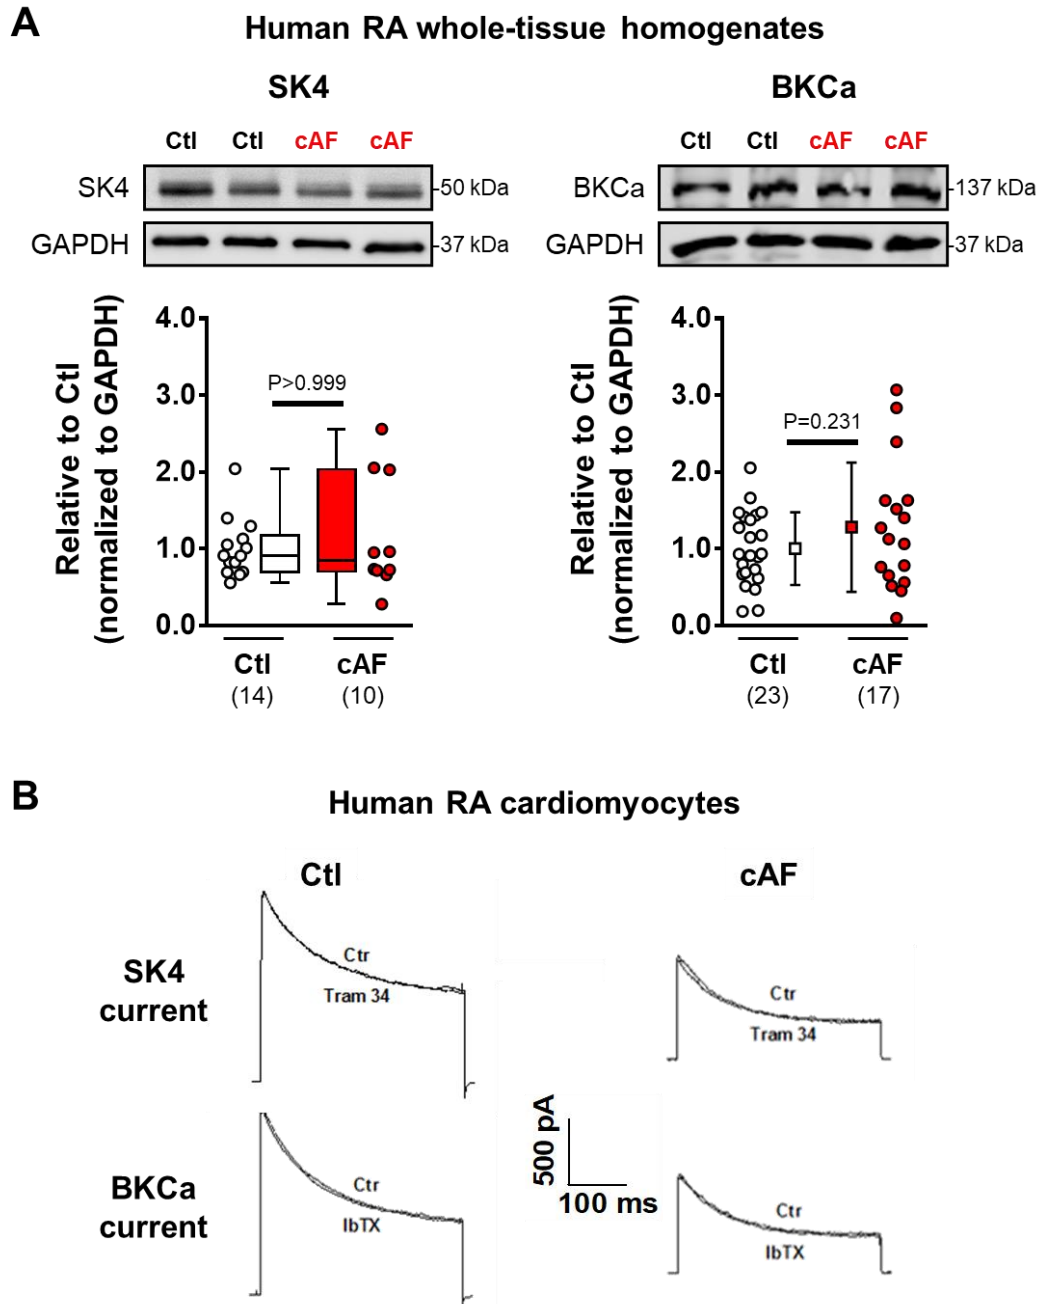

**Figure S2. Intermediate and big-conductance  $\text{Ca}^{2+}$ -activated  $\text{K}^+$ -currents (SK4 and BKCa, respectively) in Ctl- and cAF-patients. A**, Example Western blots (top) and protein levels (bottom) of SK4 (left panels) and BKCa (right panels) channel subunits in right-atrial (RA) whole-tissue homogenates of Ctl- and cAF-patients. GAPDH was used as loading control. **B**, Membrane-current recordings during a 300-ms depolarization pulse to +80 mV in Ctl (left) or cAF (right) human RA-cardiomyocytes in the absence and presence of the SK4-current blocker Tram34 (100-nmol/L, top) or the BKCa-current blocker iberitoxin (ibTX, 300-nmol/L, bottom), indicating the absence of functional SK4 or BKCa channels. N-numbers indicate number of patients. P-values are based on Mann-Whitney test (SK4) or unpaired Student's *t*-test (BKCa).

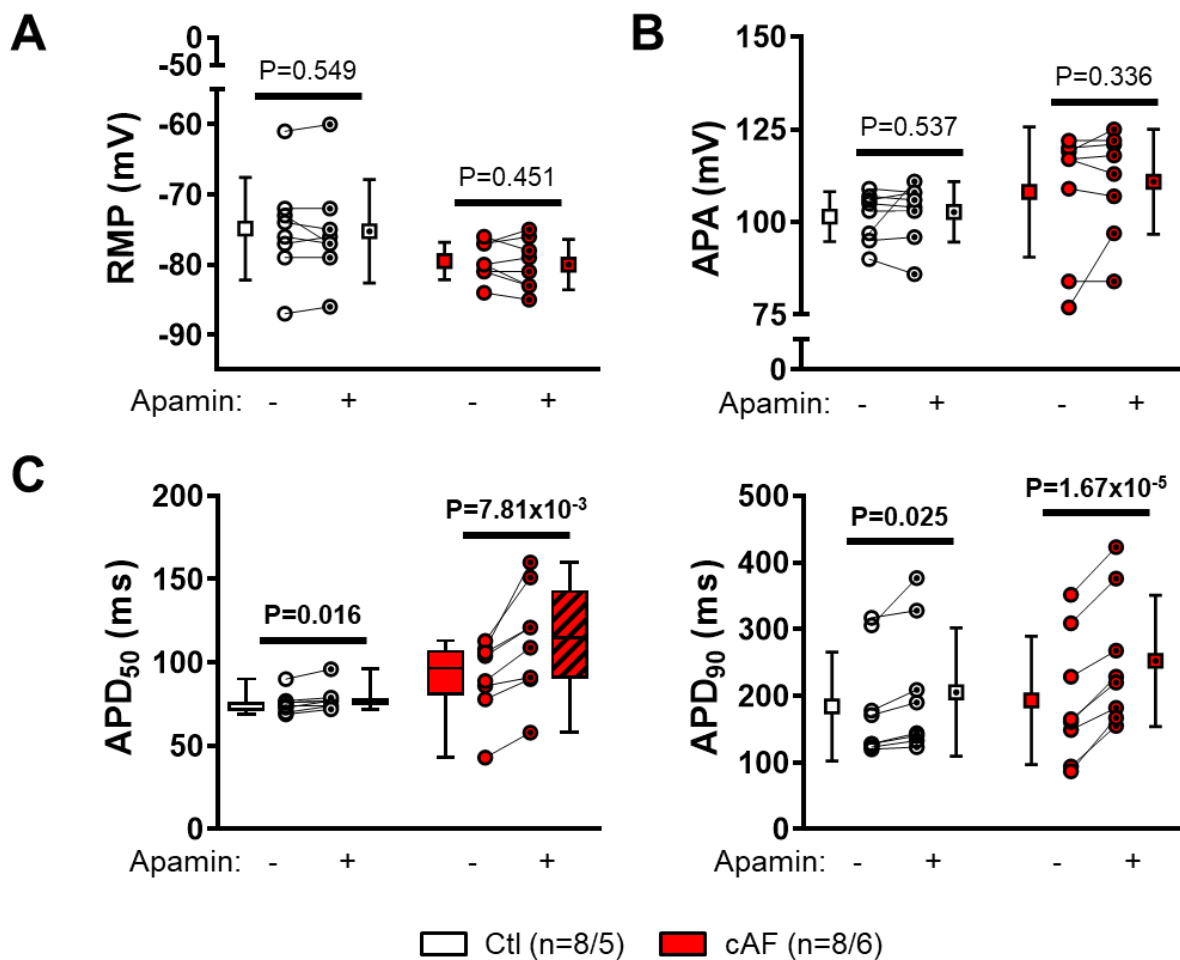

**Figure S3. Apamin-induced changes in action potential (AP) characteristics.** A-C, Resting membrane potential (RMP; **A**), AP amplitude (APA; **B**) and AP duration at 50% or 90% of repolarization (APD<sub>50</sub> and APD<sub>90</sub>, **C**) before and after application of apamin (100-nmol/L) in right-atrial cardiomyocytes from Ctl- and cAF-patients. N-numbers indicate numbers of cardiomyocytes/patients. P-values are based on paired Student's *t*-test (for RMP, APA and APD<sub>90</sub>) or Wilcoxon signed rank test for paired samples (for APD<sub>50</sub>) before and after apamin application.

### Before global optimization

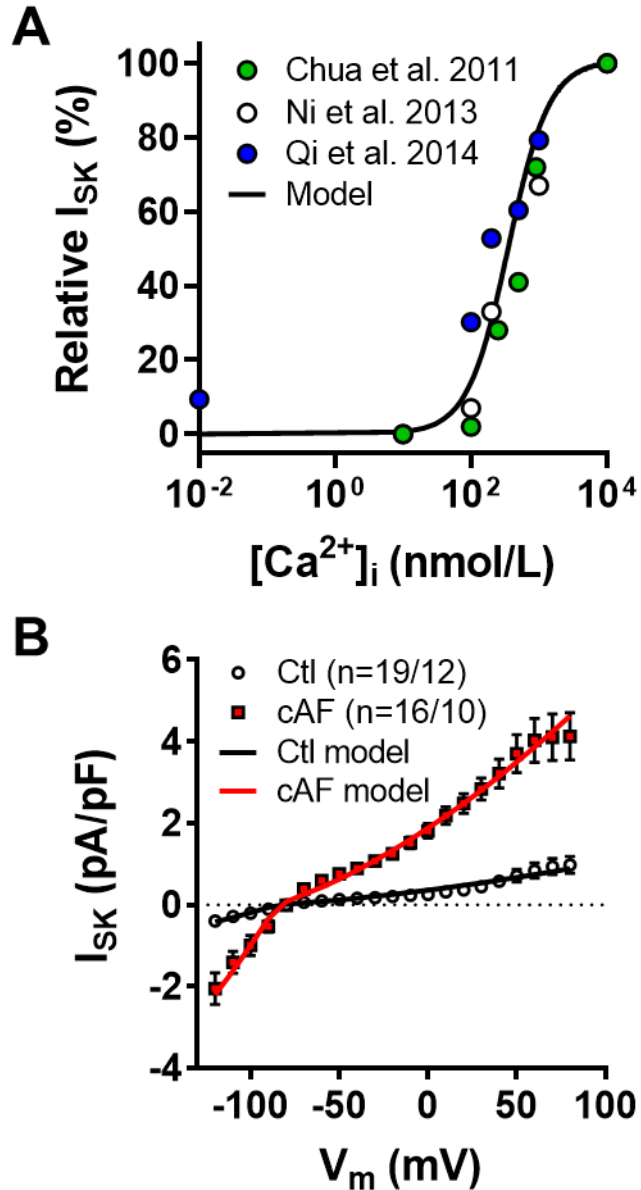

**Figure S4. Small-conductance  $Ca^{2+}$ -activated  $K^+$  current ( $I_{SK}$ ) formulation. A,** Experimental<sup>7,63,64</sup> and simulated  $Ca^{2+}$  dependence of  $I_{SK}$ . **B,** Experimental and simulated voltage dependence of  $I_{SK}$  in Ctl and cAF human atrial cardiomyocytes (with intracellular  $Ca^{2+}$  buffered at 500 nmol/L).

## Optimization strategy for human atrial cardiomyocyte model

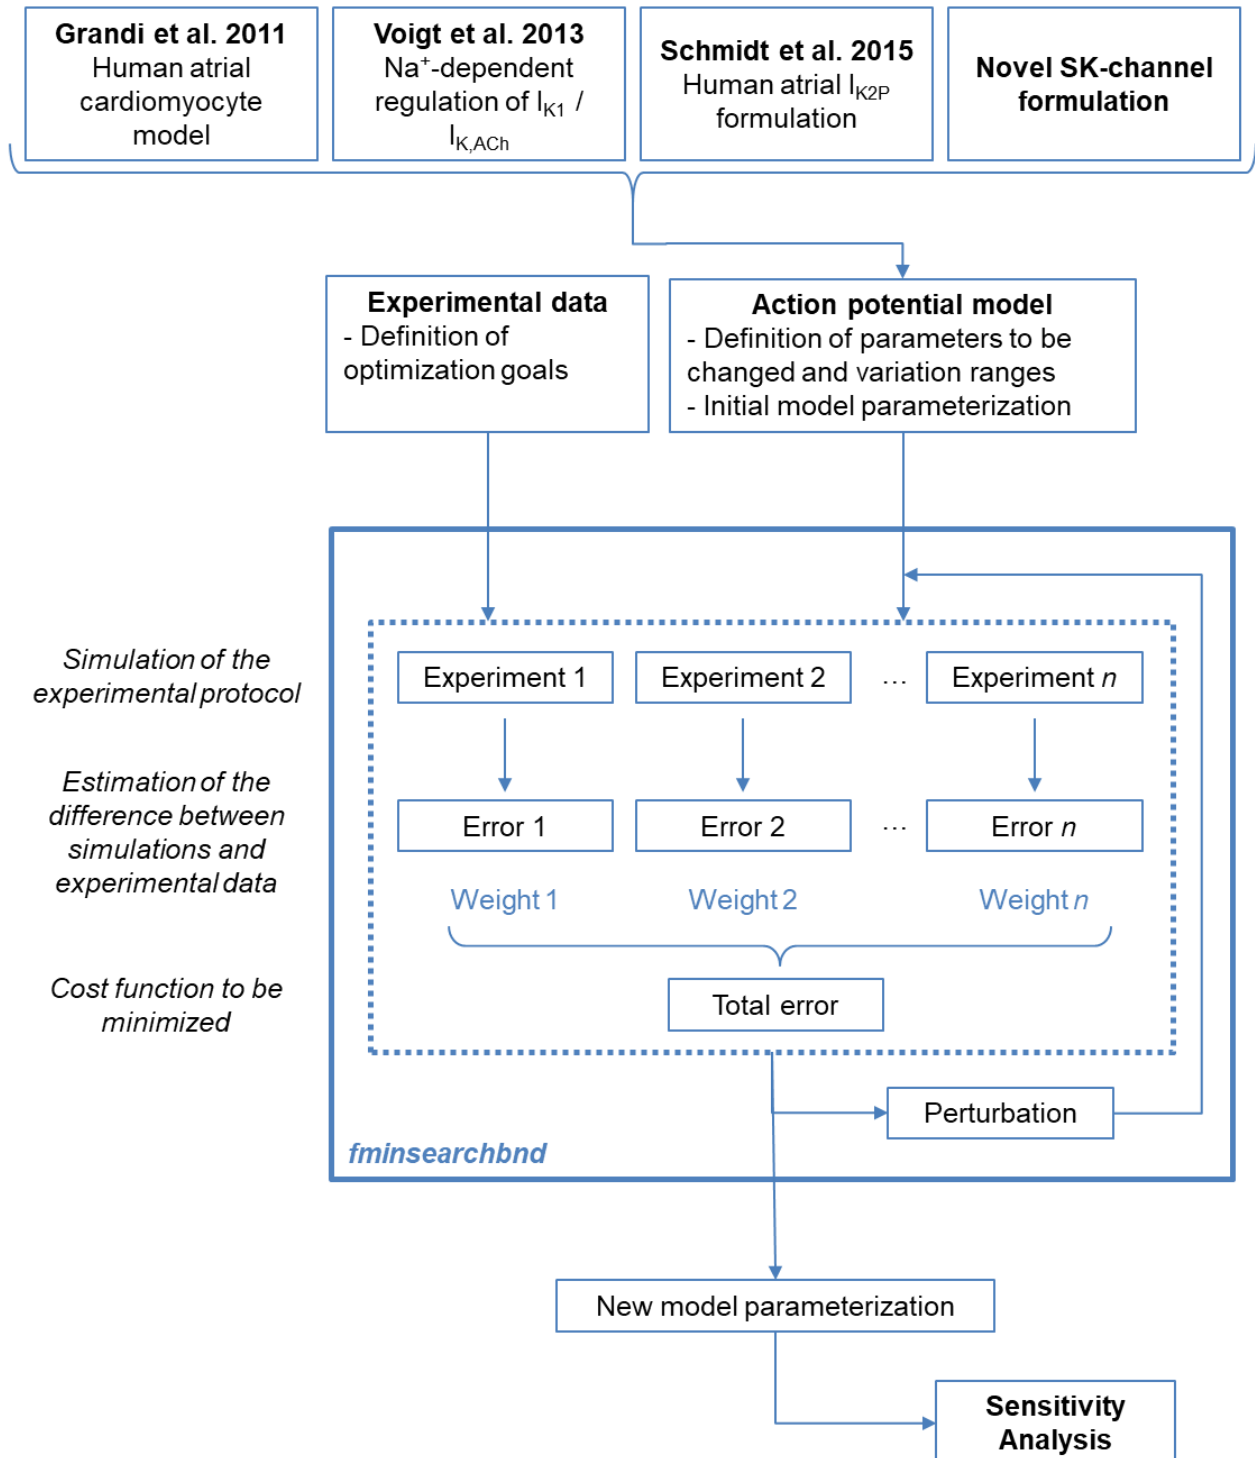

Figure S5. Flow chart showing the methodology adopted for building and optimizing the Ctl and cAF versions of the human atrial cardiomyocyte model.



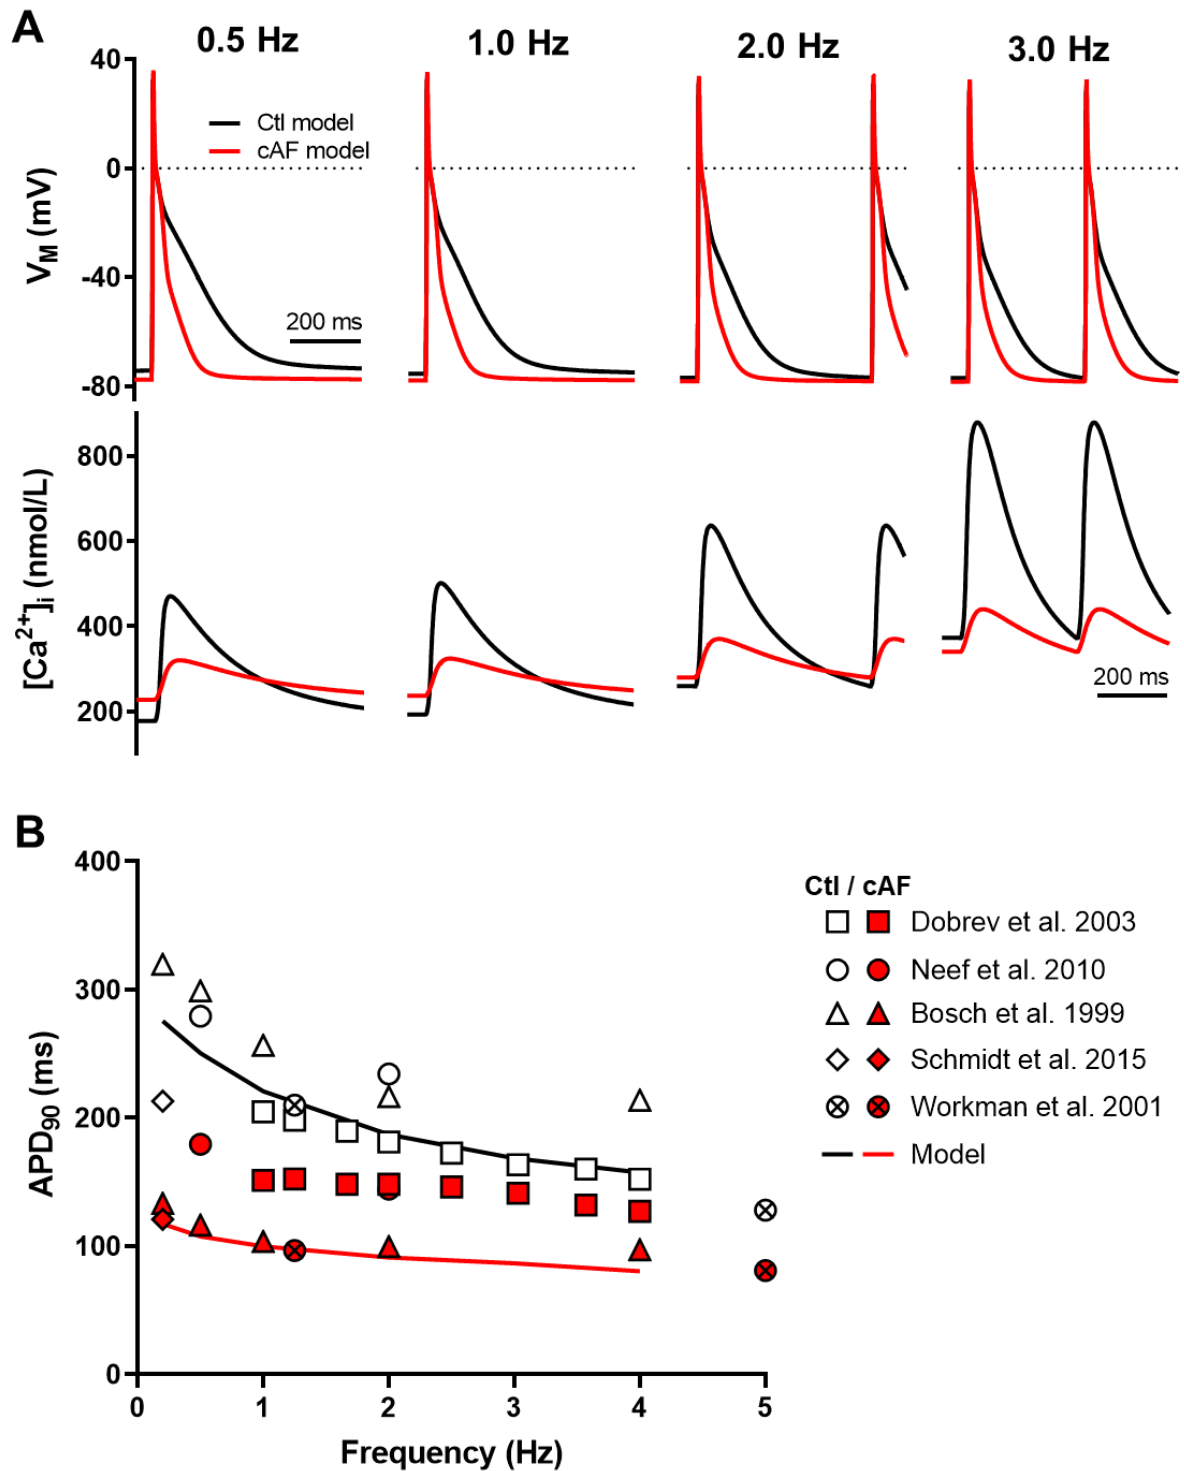

**Figure S6. Frequency dependence of action potential duration (APD).** **A**, Simulated time courses of membrane potential and cytosolic  $Ca^{2+}$  transient obtained during steady-state pacing of the Ctl and cAF models at pacing rates of 0.5, 1, 2 and 3 Hz. **B**, Experimental<sup>[36,59,66,69,70]</sup> and simulated rate-dependence of APD<sub>90</sub> values in Ctl and cAF human atrial cardiomyocytes.

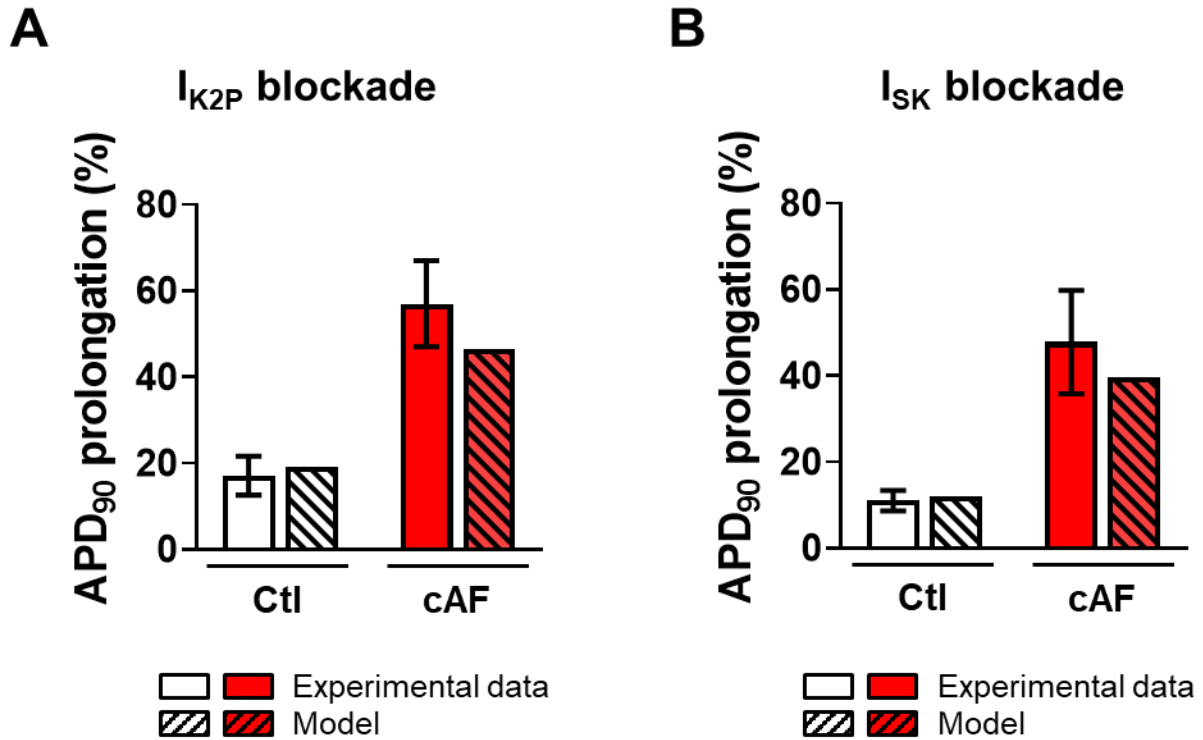

**Figure S7. Consequences of two-pore domain  $K^+$  current ( $I_{K2P}$ ) and small-conductance  $Ca^{2+}$ -activated  $K^+$  current ( $I_{SK}$ ) block.** **A**, Relative prolongation of action potential duration (APD<sub>90</sub>) induced by selective  $I_{K2P}$  block in Ctl and cAF human atrial cardiomyocytes in experiments<sup>36</sup> and simulations. **B**, Relative APD<sub>90</sub> prolongation induced by selective  $I_{SK}$  block in Ctl and cAF human atrial cardiomyocytes (with internal  $Ca^{2+}$  buffered at 500 nmol/L) in experiments (data from [Figure 1](#)) and simulations.

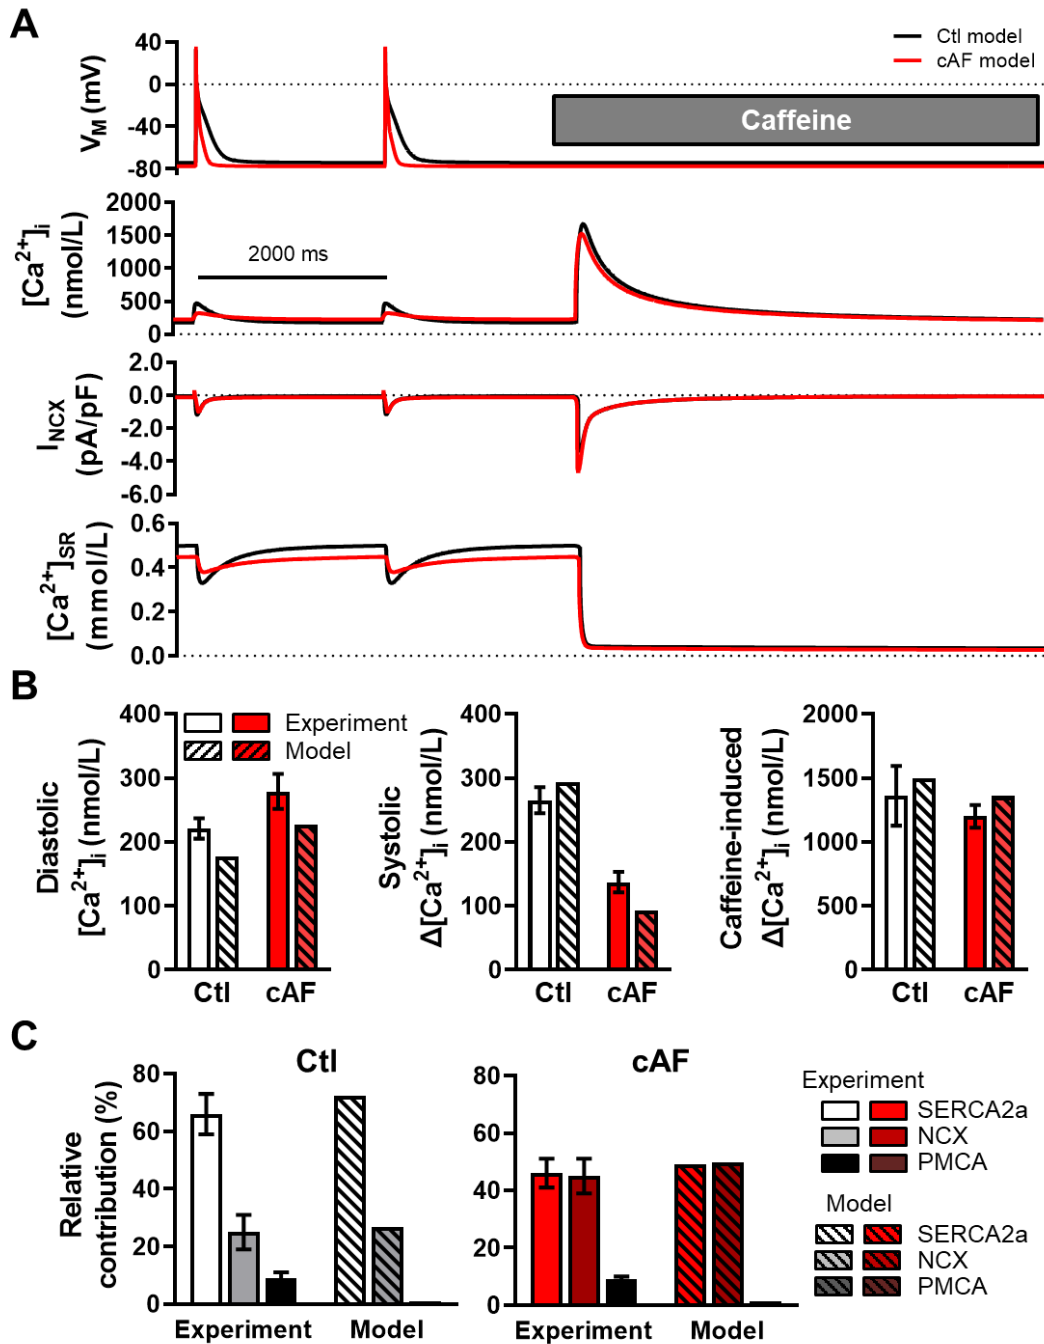

**Figure S8. Characterization of  $Ca^{2+}$  handling properties.** **A**, Time course of membrane potential ( $V_M$ ), cytosolic  $Ca^{2+}$  concentration ( $[Ca^{2+}]_i$ ),  $Na^+/Ca^{2+}$ -exchanger current ( $I_{NCX}$ ), and sarcoplasmic reticulum  $Ca^{2+}$  load ( $[Ca^{2+}]_{SR}$ ) during two action potentials at 0.5-Hz pacing and simulated application of caffeine. **B**, Comparison of diastolic  $[Ca^{2+}]_i$  (left), systolic  $Ca^{2+}$ -transient amplitude (middle) and amplitude of the caffeine-induced  $Ca^{2+}$  transient (right) in Ctl and cAF human atrial cardiomyocytes<sup>39</sup> and models. **C**, Relative contributions to total cytosolic  $Ca^{2+}$  removal of sarcoplasmic reticulum  $Ca^{2+}$  ATPase (SERCA),  $Na^+/Ca^{2+}$  exchanger (NCX), and plasma membrane  $Ca^{2+}$  ATPase (PMCA) assessed during 0.5-Hz pacing in Ctl (left) and cAF (right) cardiomyocytes in experiments<sup>39</sup> and simulations.

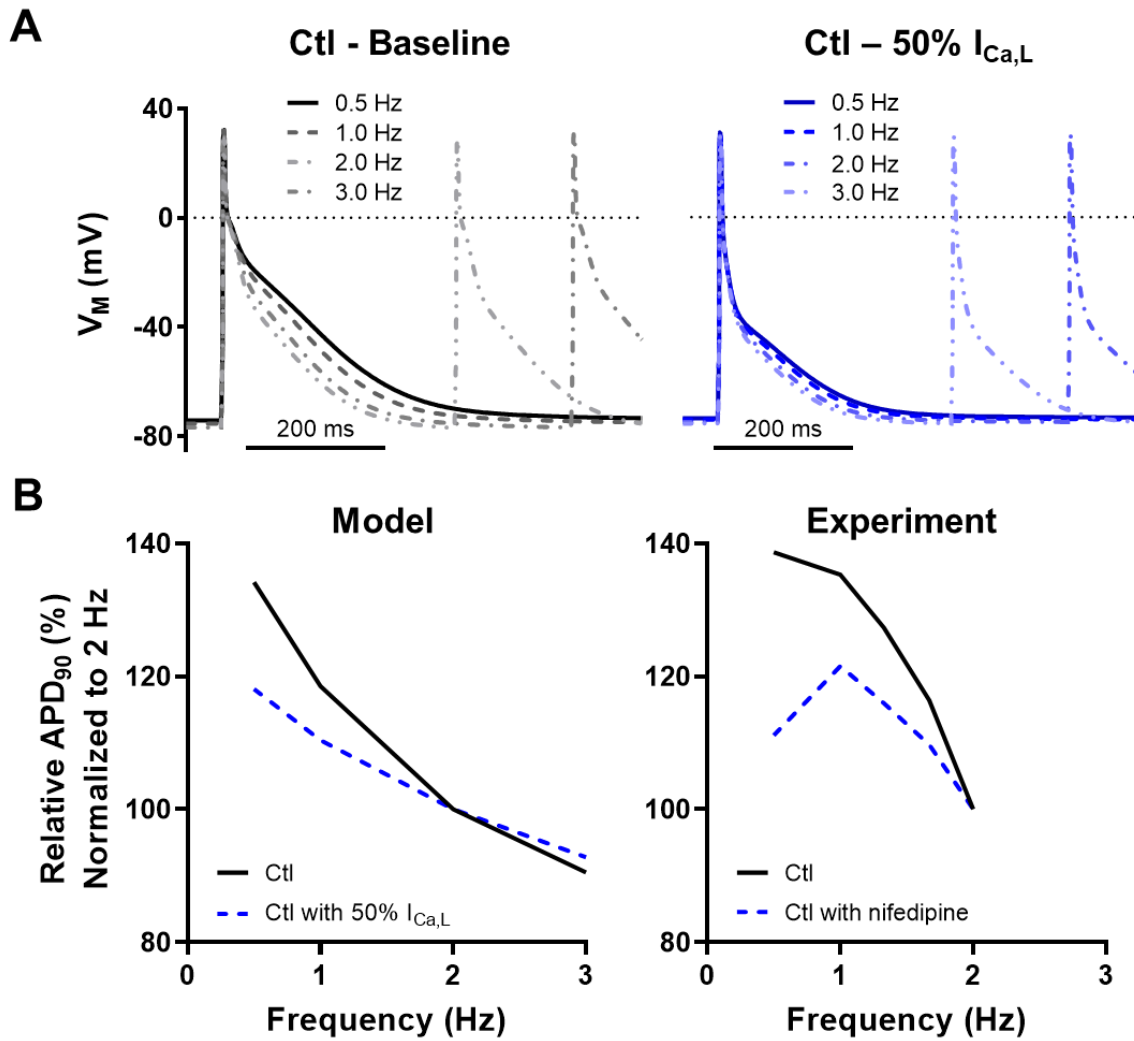

**Figure S9. Response to L-type  $Ca^{2+}$  channel block.** **A**, Time course of membrane potential in the Ctl model under baseline control conditions (**left**) and with 50% reduction in the conductance of the L-type  $Ca^{2+}$  current ( $I_{Ca,L}$ ; **right**). **B**, Frequency dependence of action potential duration ( $APD_{90}$ ; normalized to the value at 2-Hz pacing) assessed with normal (solid black line) or reduced (dashed blue line)  $I_{Ca,L}$  in simulations (**left**) and experiments<sup>68</sup> (**right**).

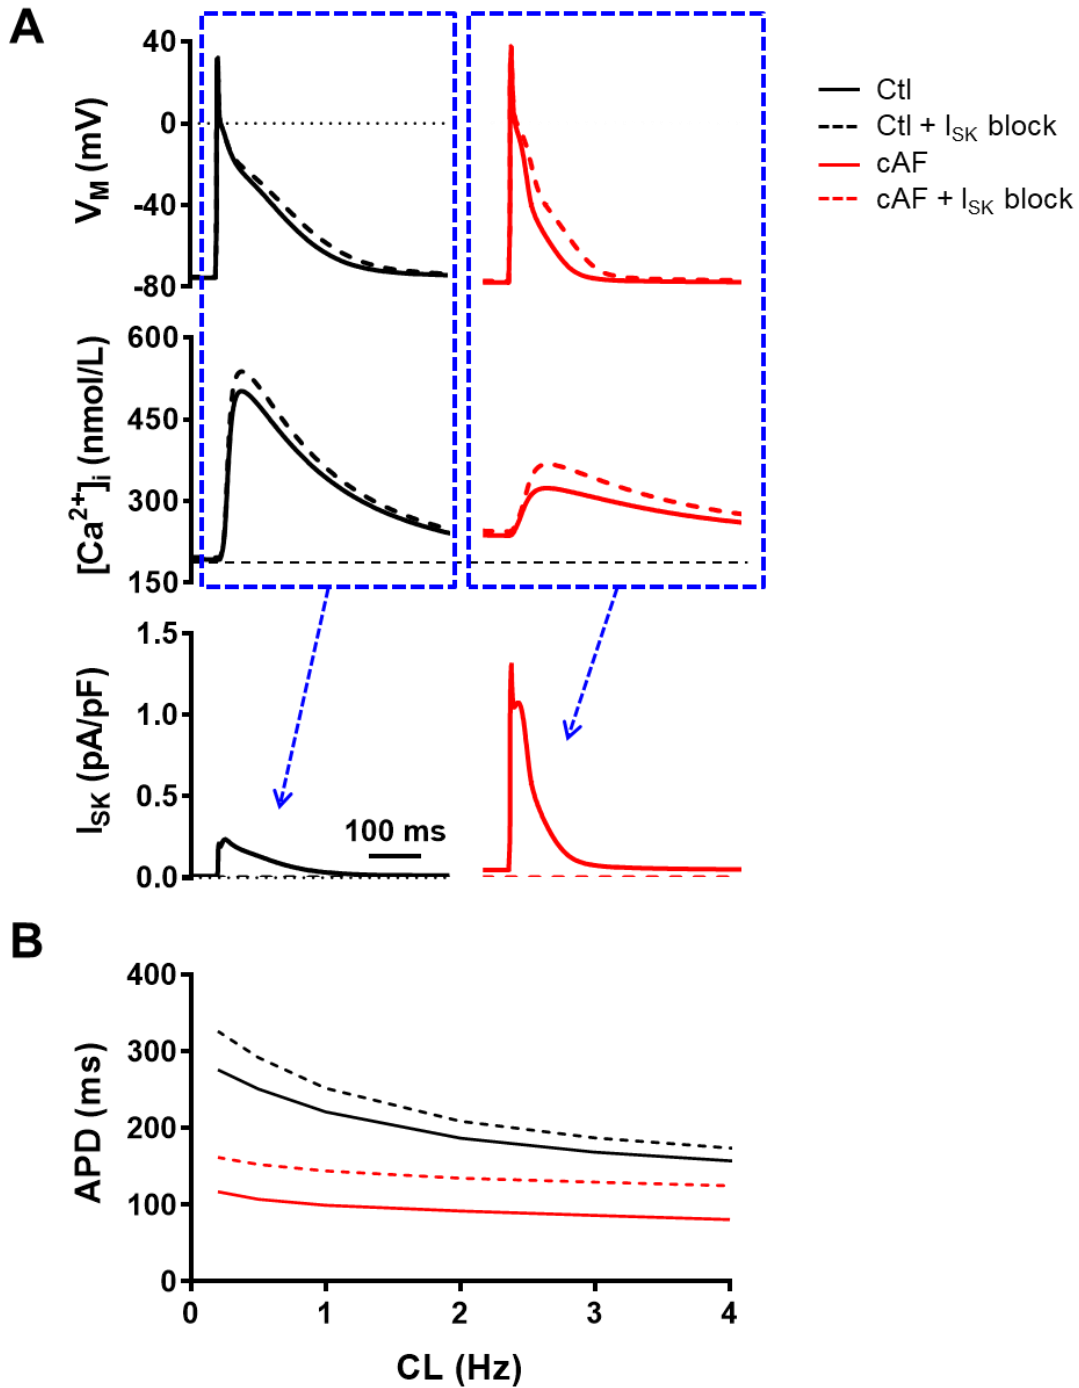

**Figure S10. Effects of small-conductance  $Ca^{2+}$ -activated  $K^+$ -current ( $I_{SK}$ ) inhibition during regular pacing in Ctl and cAF. A**, Simulated action potentials (APs),  $Ca^{2+}$ -transients and resulting small-conductance  $I_{SK}$  in the Ctl (left) and cAF (right) versions of the novel human atrial cardiomyocyte model. Dashed lines represent AP and  $Ca^{2+}$ -transient during complete  $I_{SK}$ -block. **B**, Rate-dependence of AP duration (APD) in Ctl (black lines) and cAF (red lines) model versions in the absence (solid lines) or presence (dashed lines) of  $I_{SK}$ -inhibition.

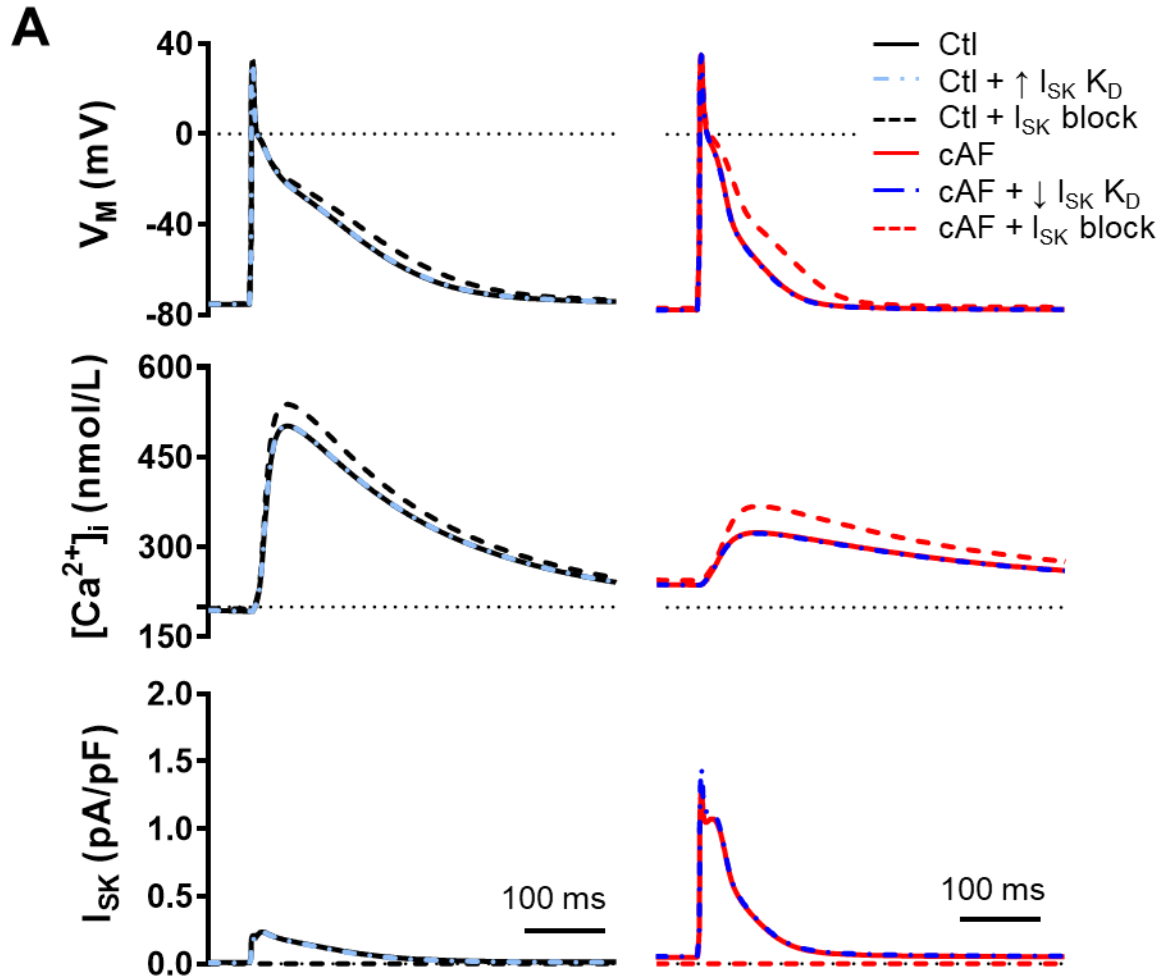

**Figure S11. Impact of changes in the  $Ca^{2+}$  affinity ( $K_D$ ) of small-conductance  $Ca^{2+}$ -activated  $K^+$  channels on  $I_{SK}$  and action potential (AP) repolarization. A, APs (top),  $Ca^{2+}$  transients (middle) and  $I_{SK}$  (bottom) at 1 Hz pacing for the default Ctl (left) and cAF (right) model configurations (solid lines), in the presence of complete  $I_{SK}$  block (dashed lines) or in models with a lower affinity (larger  $K_D$ , ~330 nmol/L) in Ctl and higher affinity (lower  $K_D$ , ~230 nmol/L) in cAF to obtain the experimentally observed 100-nmol/L difference between Ctl and cAF cardiomyocytes (dash-dotted blue lines).**

## mRNA levels in RA whole-tissue homogenates

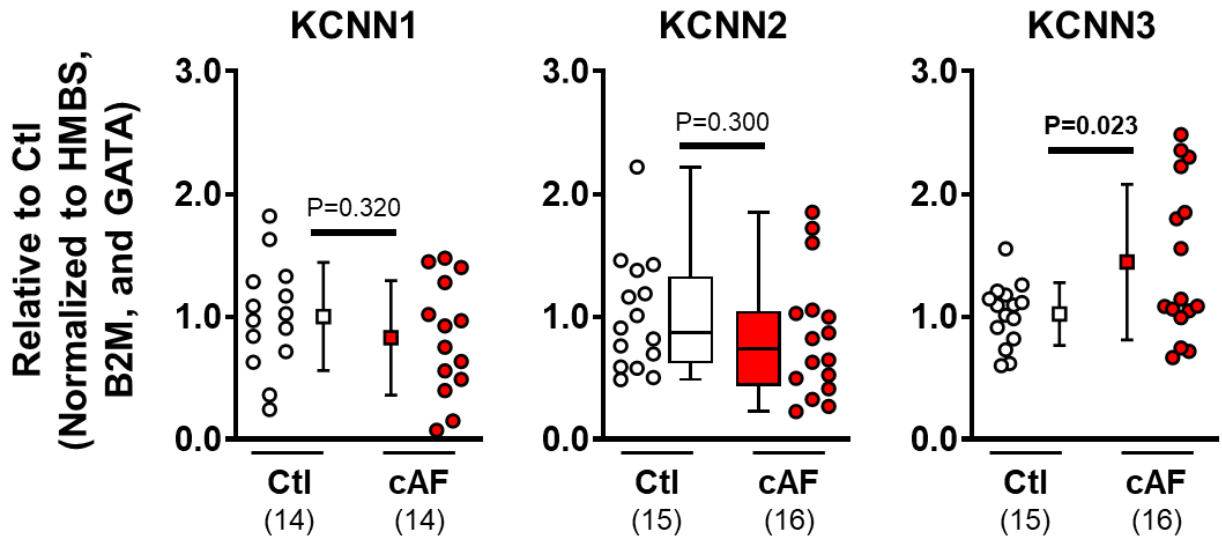

**Figure S12. mRNA levels of small-conductance  $\text{Ca}^{2+}$ -activated  $\text{K}^+$  (SK)-channel isoforms.** mRNA levels of KCNN1, KCNN2 and KCNN3 (encoding for SK1, SK2 and SK3, respectively) in human right atrial (RA) whole-tissue homogenates of Ctl- and cAF-patients. N-numbers indicate number of patients. \* $P < 0.05$  vs. Ctl based on unpaired Student's  $t$ -test (KCNN1, KCNN3) or Mann-Whitney test (KCNN2).

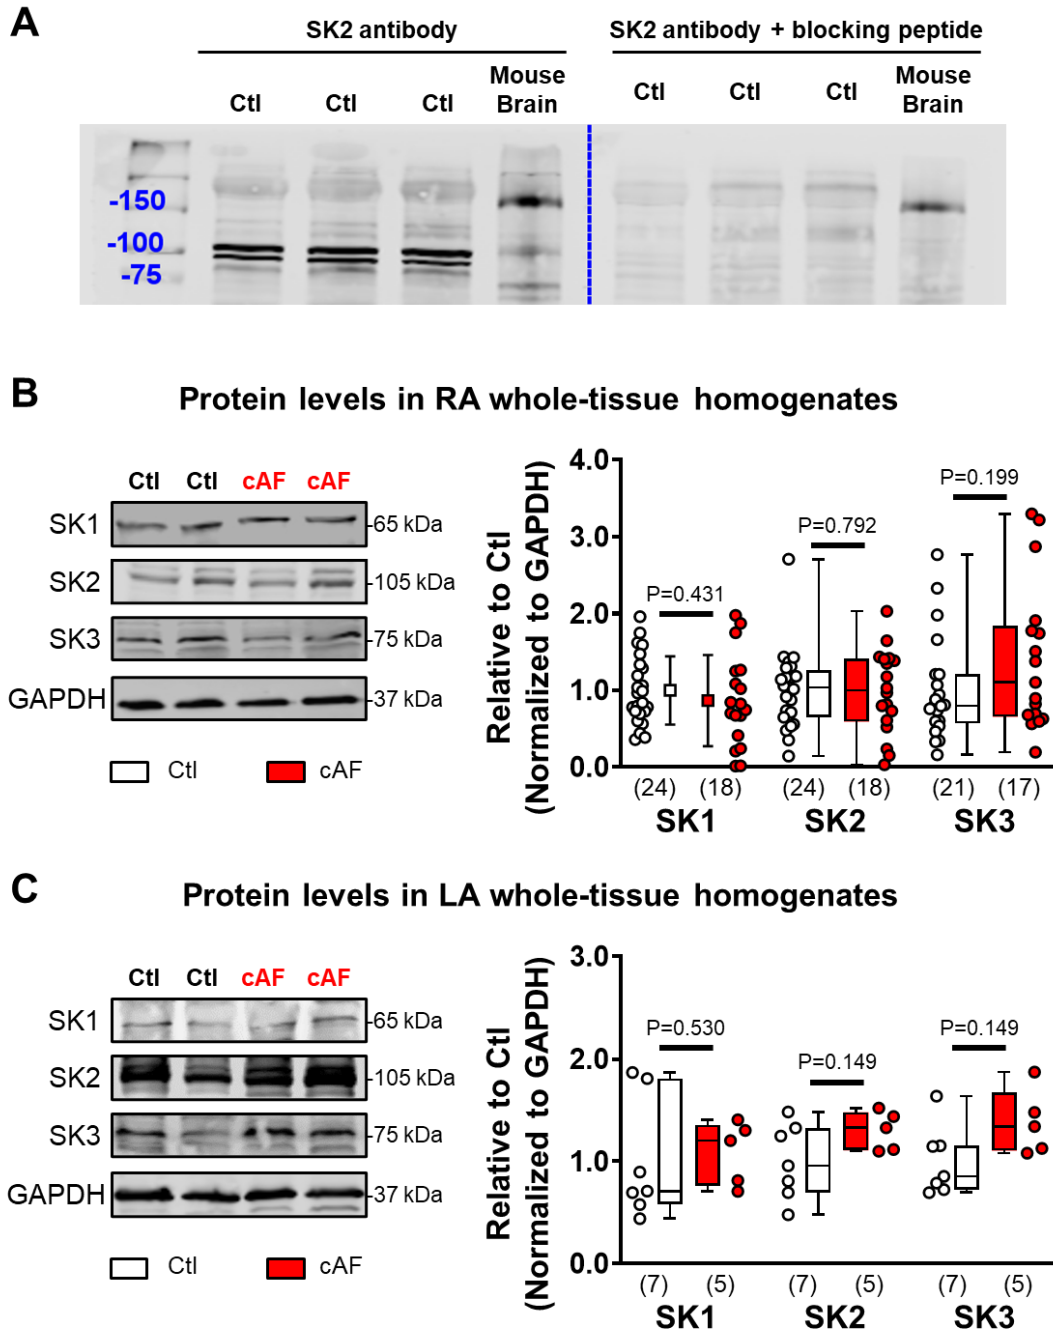

**Figure S13. Protein levels of small-conductance  $\text{Ca}^{2+}$ -activated  $\text{K}^+$  (SK)-channel isoforms (SK1-3).** **A**, Validation of the 105 kDa band observed with the SK2 antibody in human right-atrial (RA) whole-tissue homogenates using a blocking peptide. Mouse brain tissue was used as a positive control. **B**, Representative Western blots (**left**) and quantification of SK1, SK2 and SK3 proteins in RA whole-tissue homogenates from Ctl- and cAF-patients. **C**, Similar to panel **B** for left-atrial (LA) whole-tissue homogenates. N-numbers indicate number of patients. \* $P < 0.05$  vs. Ctl based on unpaired Student's *t*-test (RA SK1) or Mann-Whitney test (all other comparisons).



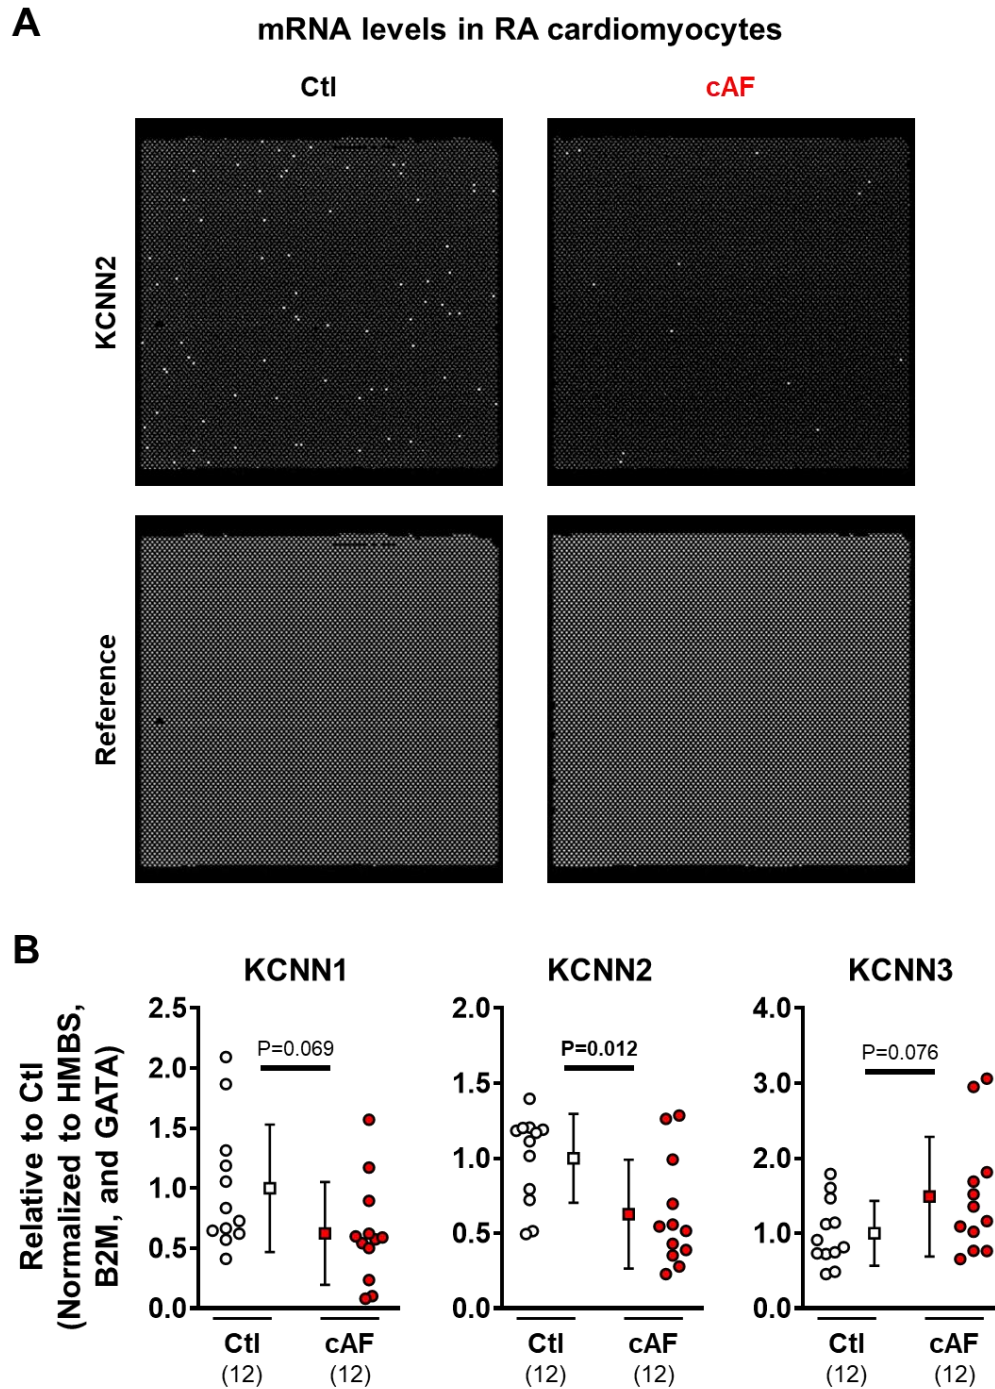

**Figure S14. mRNA levels of small-conductance  $\text{Ca}^{2+}$ -activated  $\text{K}^+$  (SK)-channel isoforms in right-atrial (RA) cardiomyocytes.** **A**, Representative digital PCR images and corresponding reference images of KCNN2 in RA-cardiomyocytes from Ctl- and cAF-patients. Each well contains 8500 partitions and copies/ $\mu\text{L}$  values are calculated based on the number of illuminated points and the reference channel. Representative examples of all SK-isoforms and housekeeping genes are shown in [Figure S15](#). **B**, mRNA levels of KCNN1, KCNN2 and KCNN3 in RA-cardiomyocytes of Ctl- and cAF-patients. N-numbers indicate number of patients. P-values are based on unpaired Student's *t*-test.



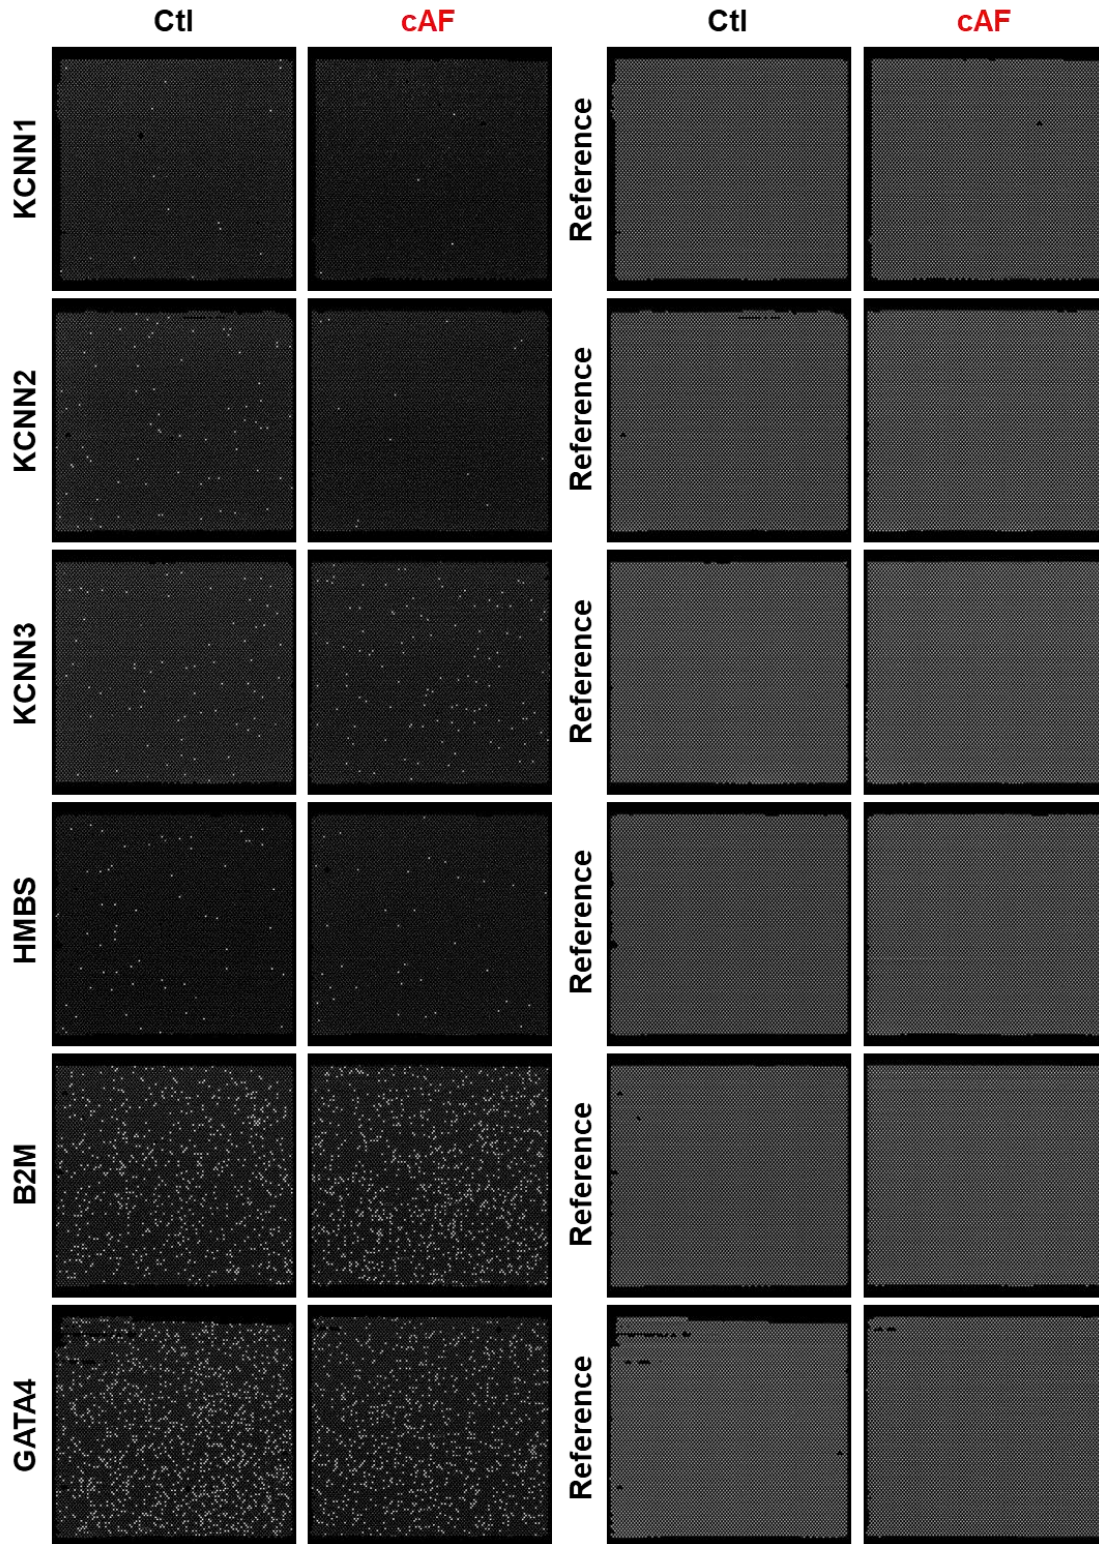

Figure S15. Representative digital PCR images and corresponding reference images of KCNN1, KCNN2, KCNN3 and the housekeeping genes HMBS, B2M and GATA4 in right-atrial cardiomyocytes from Ctl- and cAF-patients.

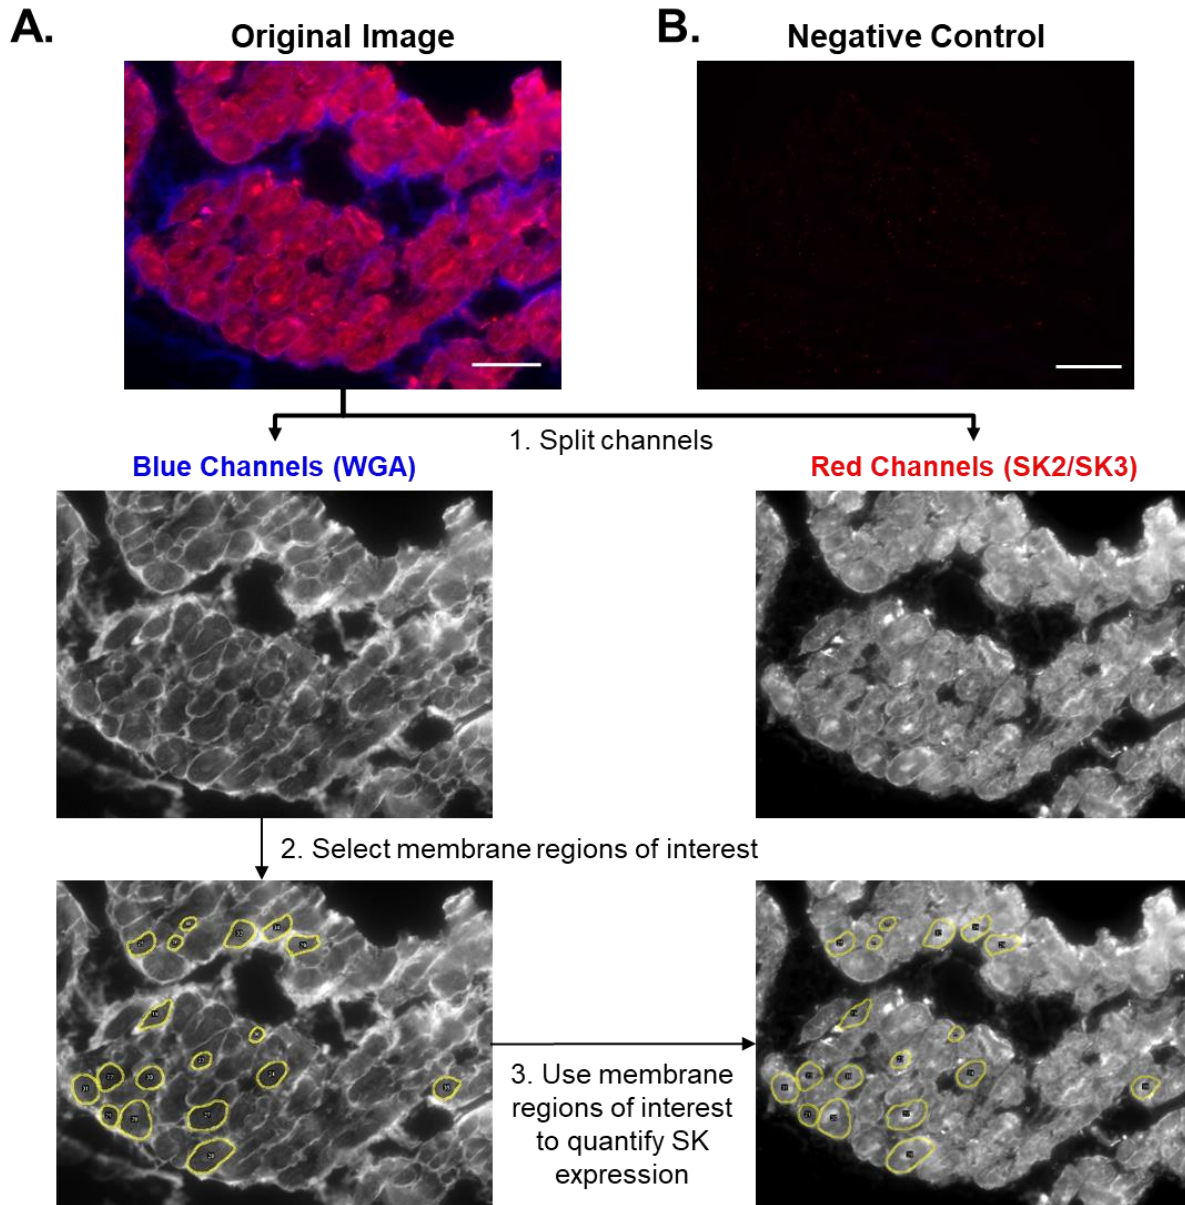

**Figure S16. Methodology for immunostaining of small-conductance  $\text{Ca}^{2+}$ -activated  $\text{K}^+$  (SK) channels in human right- or left-atrial tissue slices.** **A**, Images were obtained from tissue slices stained with antibodies against wheat germ agglutinin (WGA) and SK2 or SK3. The channels were split and the WGA signal was used to identify cardiomyocytes with clear membrane staining. In these cardiomyocytes the membrane was traced and these regions of interest were subsequently used to determine the relative membrane to cytosol fluorescence intensity ratio of SK2 and SK3. Scale bar represents 50  $\mu\text{m}$ . **B**, Negative control stained without primary antibodies. Scale bar represents 200  $\mu\text{m}$ .



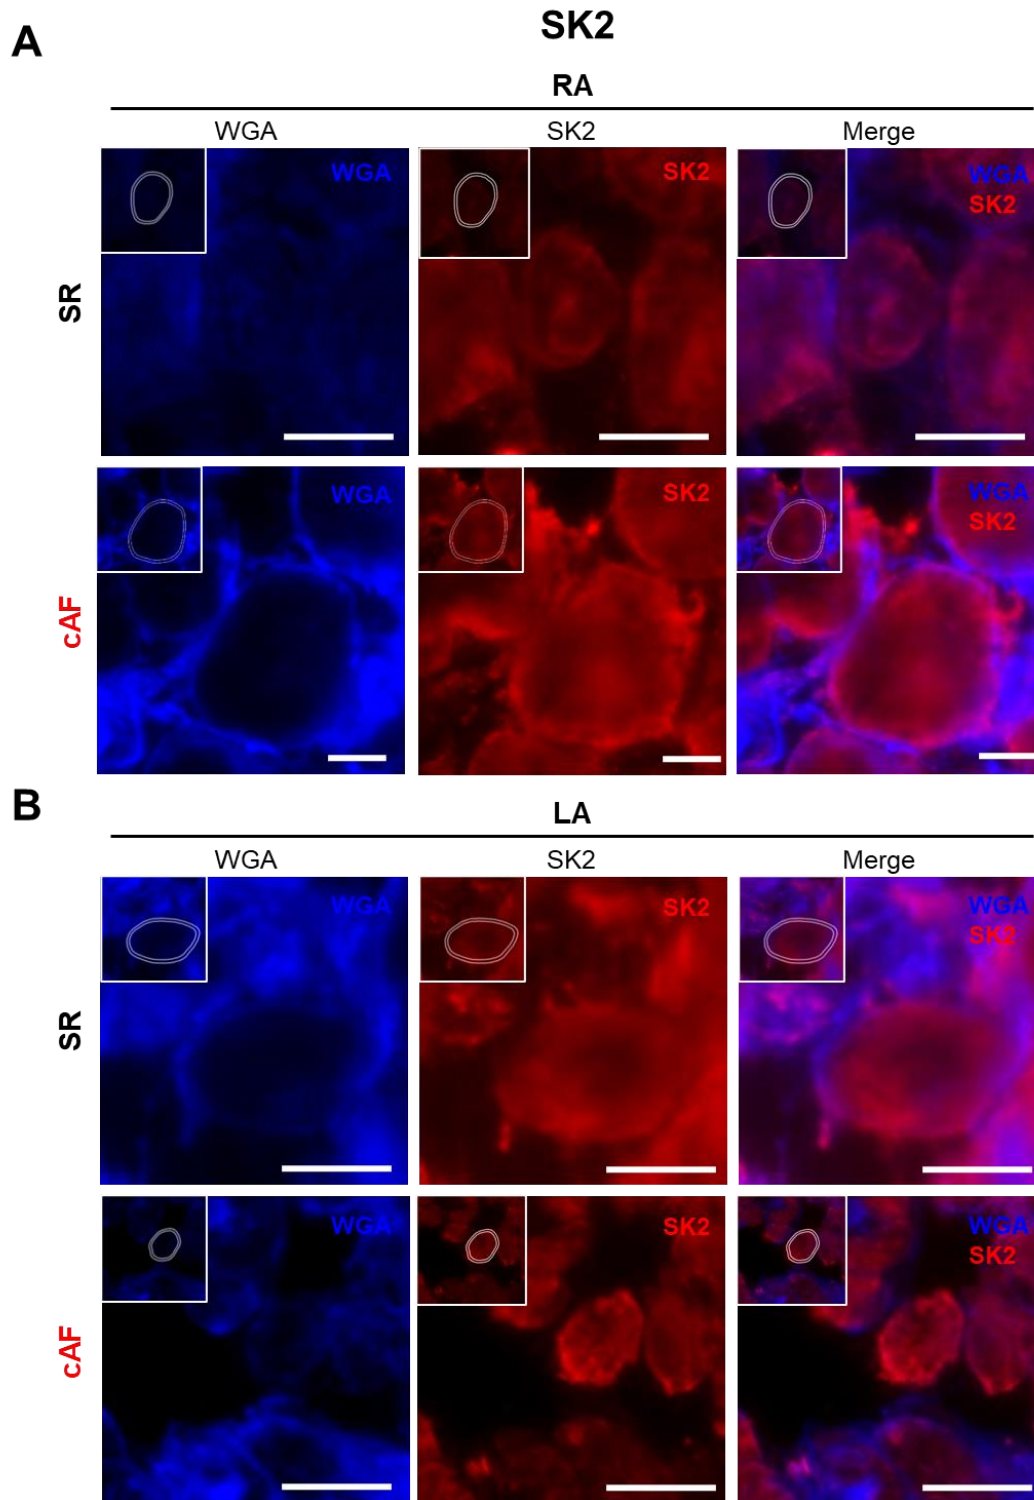

**Figure S17. Representative examples of wheat germ agglutinin (WGA) and small-conductance  $Ca^{2+}$ -activated  $K^+$  channel 2 (SK2) immunostaining. A,B, WGA staining (blue), SK2 staining (red) and their combination in right-atrial (RA; panel A) and left-atrial (LA; panel B) tissue slices from Ctl- and cAF-patients. Insets show membrane regions defined based on WGA staining. Scale bars represent 10  $\mu$ m.**

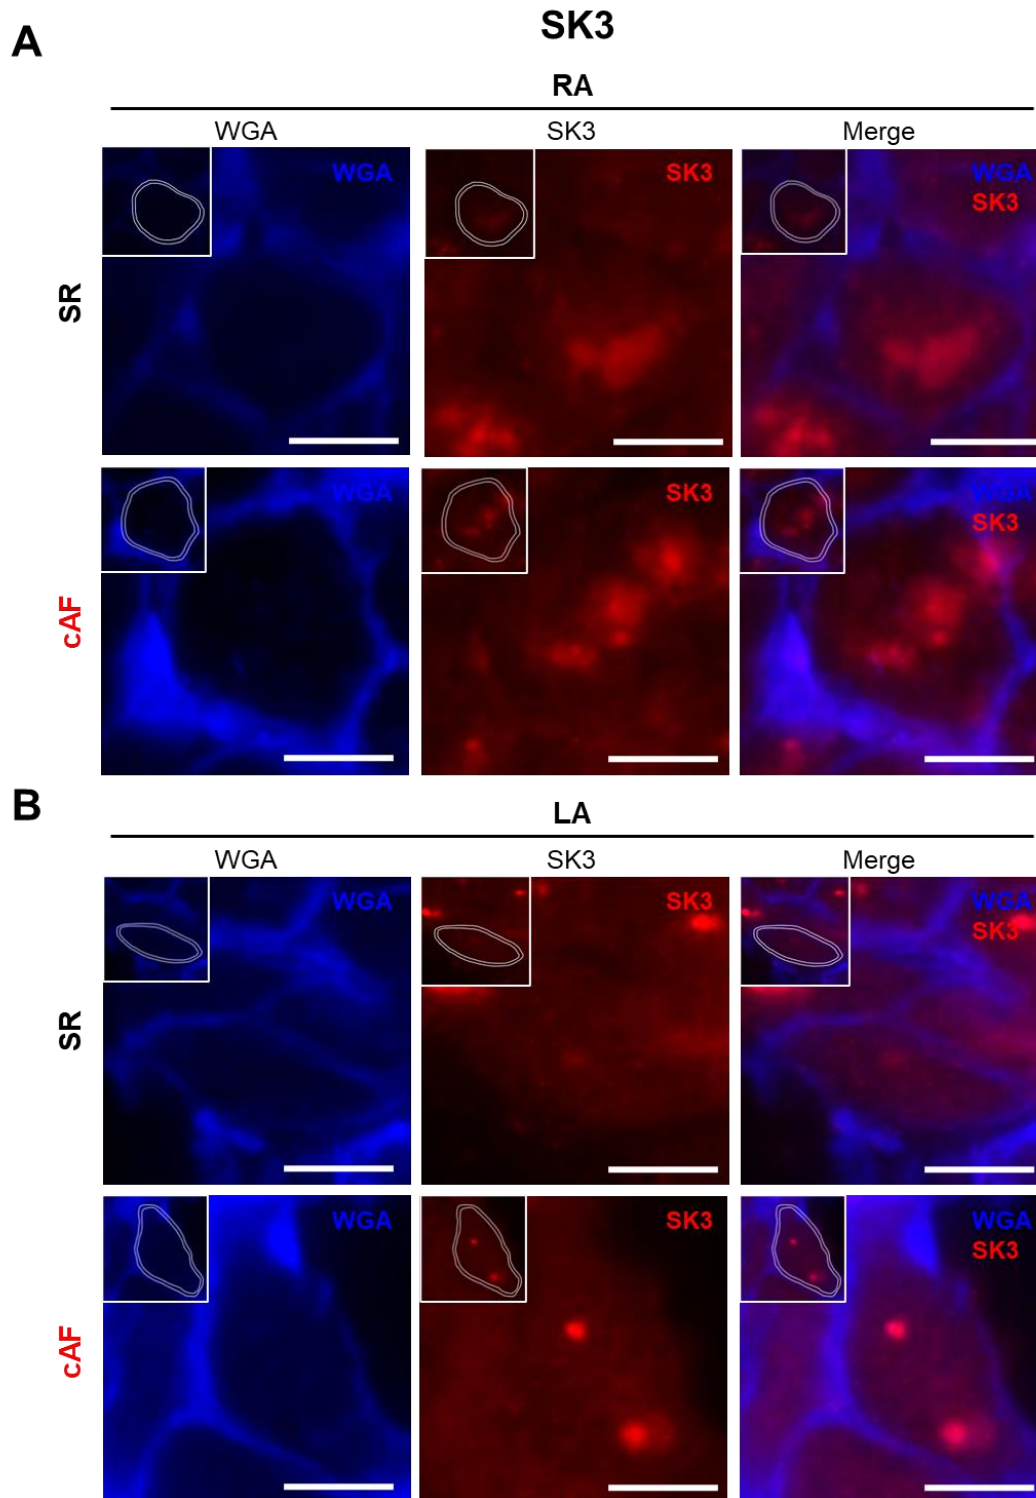

**Figure S18. Representative examples of wheat germ agglutinin (WGA) and small-conductance  $Ca^{2+}$ -activated  $K^+$  channel 3 (SK3) immunostaining. A,B, WGA staining (blue), SK3 staining (red) and their combination in right-atrial (RA; panel A) and left-atrial (LA; panel B) tissue slices from Ctl- and cAF-patients. Insets show membrane regions defined based on WGA staining. Scale bars represent 10  $\mu$ m.**

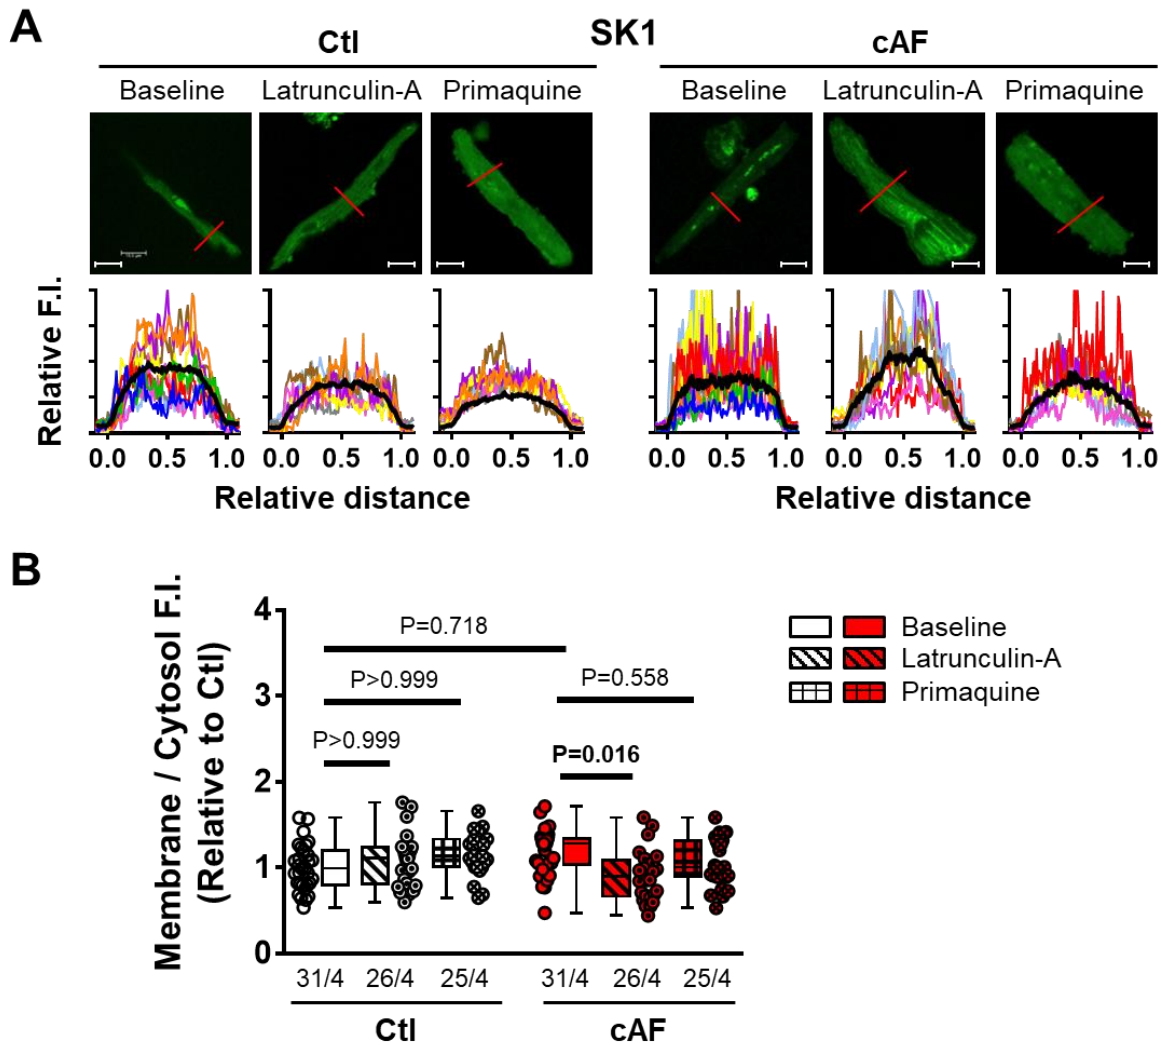

**Figure S19. Membrane localization and trafficking of small-conductance  $\text{Ca}^{2+}$ -activated  $\text{K}^{+}$ -channel 1 (SK1).** **A**, Representative immunocytochemistry of SK1 in right-atrial (RA)-cardiomyocytes from Ctl- and cAF-patients at baseline or after inhibition of anterograde or retrograde protein trafficking with latrunculin-A (1- $\mu\text{mol/L}$  for 2-hours) or primaquine (120- $\mu\text{mol/L}$  for 4-hours), respectively. Lower panels show transversal line profiles of fluorescence intensity (F.I.) for all cardiomyocytes (thin colored lines), as well as the average across all cells (thick black lines). Scale bars indicate 15- $\mu\text{m}$ . **B**, Average F.I. of SK1 at the membrane (first and last 10% of cell width) compared to the cytosol (middle 80%) for Ctl and cAF with or without latrunculin-A (diagonal-patterned bars) or primaquine (hashed bars). Data are normalized to RA-cardiomyocytes from Ctl-patients at baseline. N-numbers indicate numbers of cardiomyocytes/patients. P-values are based on multilevel mixed models with log-transformed data to account for non-independent measurements in multiple cells from individual patients and are Bonferroni-corrected to account for multiple comparisons.

**A**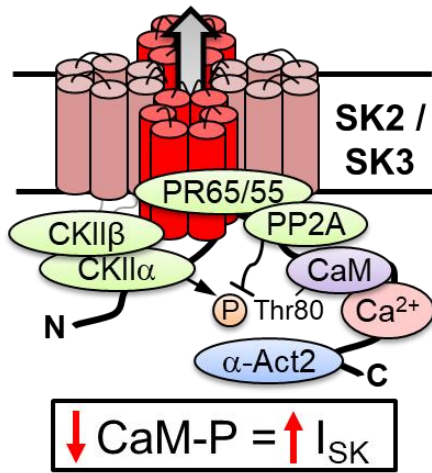**B**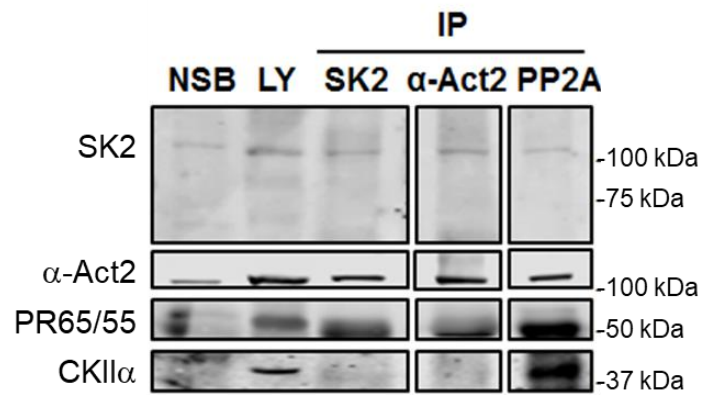

**Figure S20. The small-conductance Ca<sup>2+</sup>-activated K<sup>+</sup> (SK) channel macromolecular complex.** **A**, Schematic representation of the SK-channel macromolecular complex, including phosphorylation-dependent regulation of calmodulin (CaM). **B**, Representative Western blots of SK2,  $\alpha$ -actinin2 ( $\alpha$ -Act2), the protein phosphatase 2A (PP2A)-regulatory subunit PR65/55 and casein kinase II $\alpha$  (CKII $\alpha$ ) in right-atrial lysates (Ly) or immunoprecipitates (IP) of SK2,  $\alpha$ -Act2 or PP2A, confirming their presence as part of the SK2 macromolecular complex. NSB refers to a negative control for non-specific binding (beads and lysates without antibody).

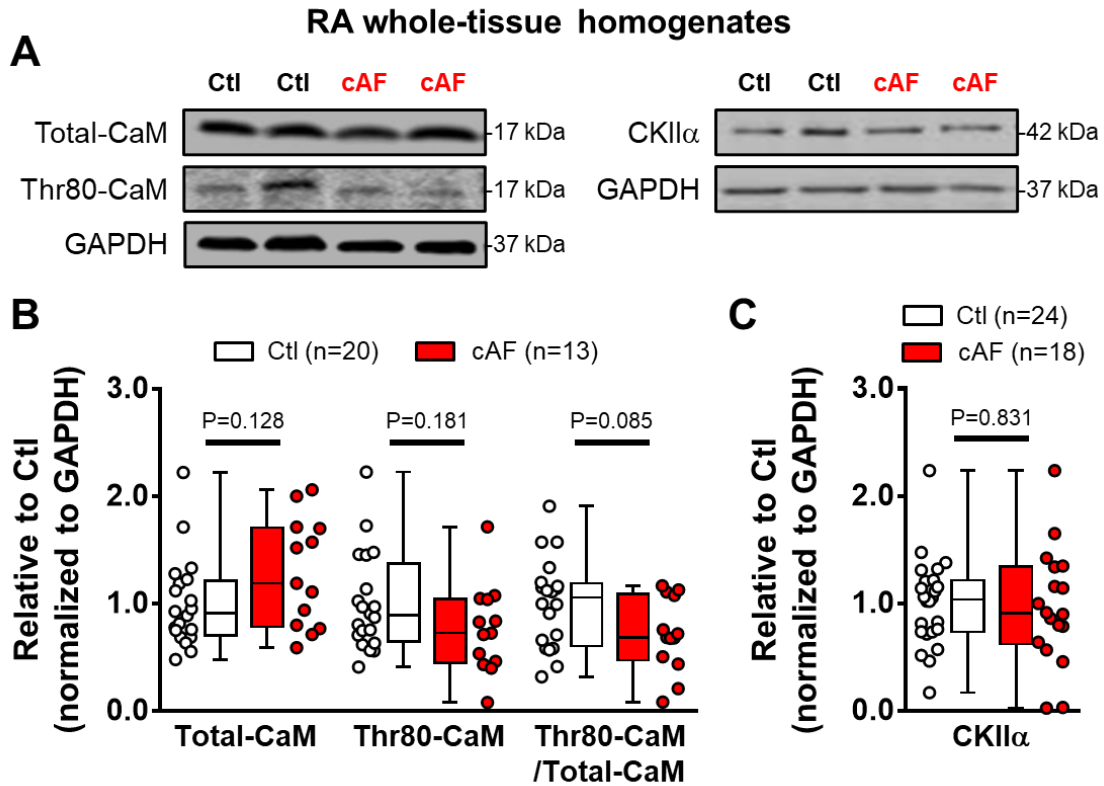

**Figure S21. cAF-associated remodeling of calmodulin (CaM) and casein kinase II $\alpha$  (CKII $\alpha$ ) in right-atrial (RA) whole-tissue homogenates.** **A**, Representative Western blots of total and Thr80-phosphorylated CaM (**left**) and CKII $\alpha$  (**right**) in RA whole-tissue homogenates of Ctl- and cAF-patients. GAPDH was used as loading control. **B**, Quantification of total and Thr80-phosphorylated calmodulin, as well as relative phosphorylation ratio in Ctl- and cAF-patients. **C**, Quantification of protein levels of CKII $\alpha$  in RA whole-tissue homogenates of Ctl and cAF patients. N-numbers indicate number of patients. P-values are based on Mann-Whitney test.



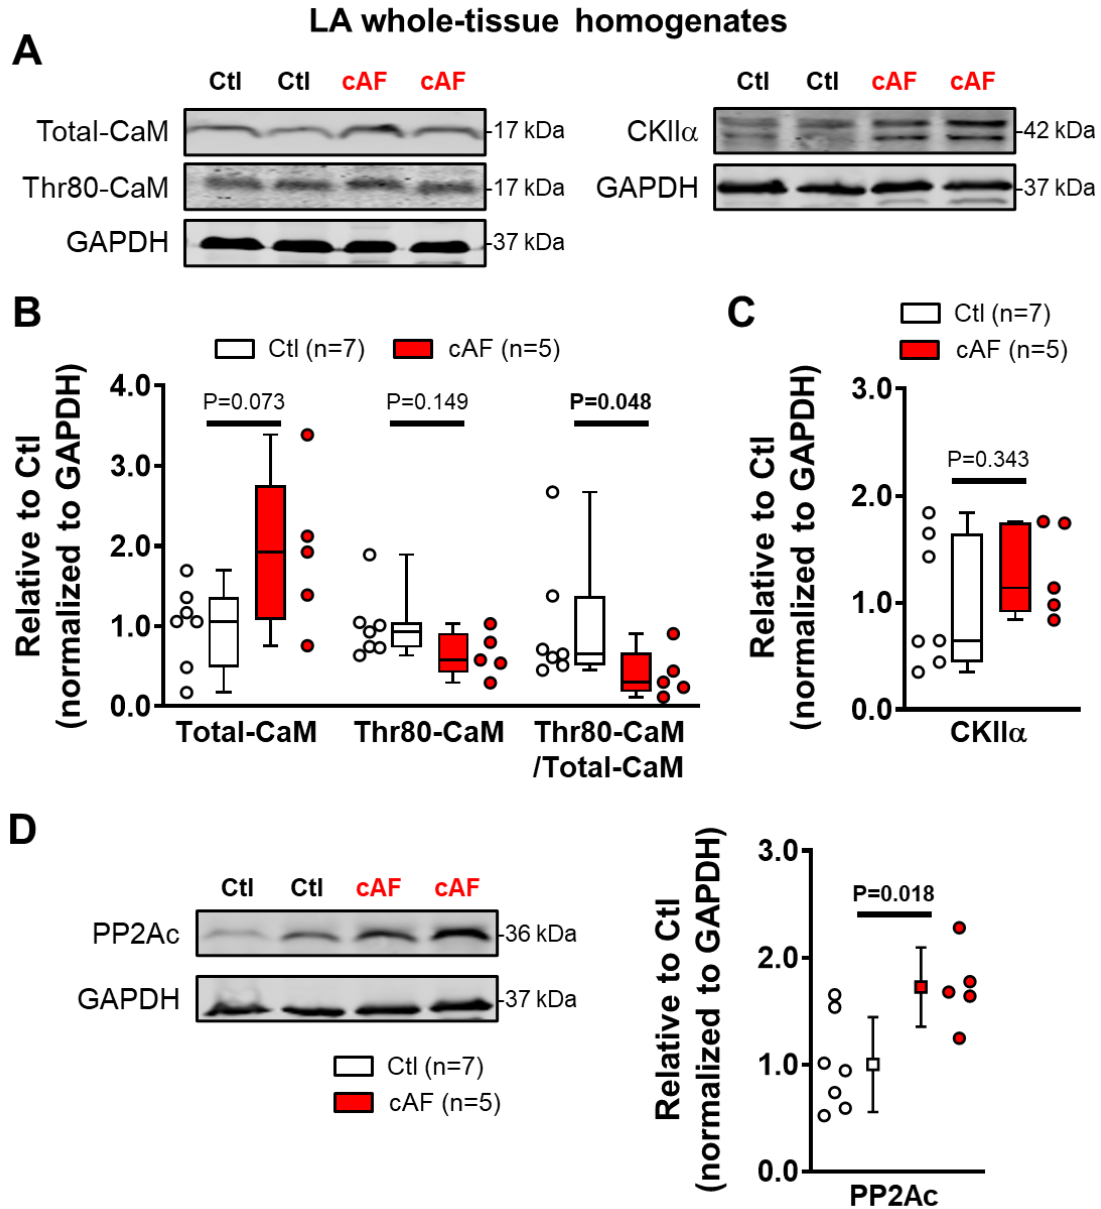

**Figure S22. cAF-associated remodeling of calmodulin, casein kinase II $\alpha$  (CKII $\alpha$ ), and catalytic protein phosphatase type-2a (PP2Ac) in left-atrial (LA) whole-tissue homogenates.** **A**, Representative Western blots of total and Thr80-phosphorylated CaM (**left**) and CKII $\alpha$  (**right**) in LA whole-tissue homogenates of Ctl- and cAF-patients. GAPDH was used as loading control. **B**, Quantification of total and Thr80-phosphorylated calmodulin, as well as relative phosphorylation ratio in Ctl- and cAF-patients. **C**, Quantification of protein levels of CKII $\alpha$  in LA whole-tissue homogenates of Ctl- and cAF-patients. **D**, Representative Western blots (**left**) and quantification (**right**) of PP2Ac protein levels in LA whole-tissue homogenates of Ctl- and cAF-patients. GAPDH was used as loading control. N-numbers indicate number of patients. P-values are based on Mann-Whitney test (**B,C**) or unpaired Student's *t*-test (**D**).

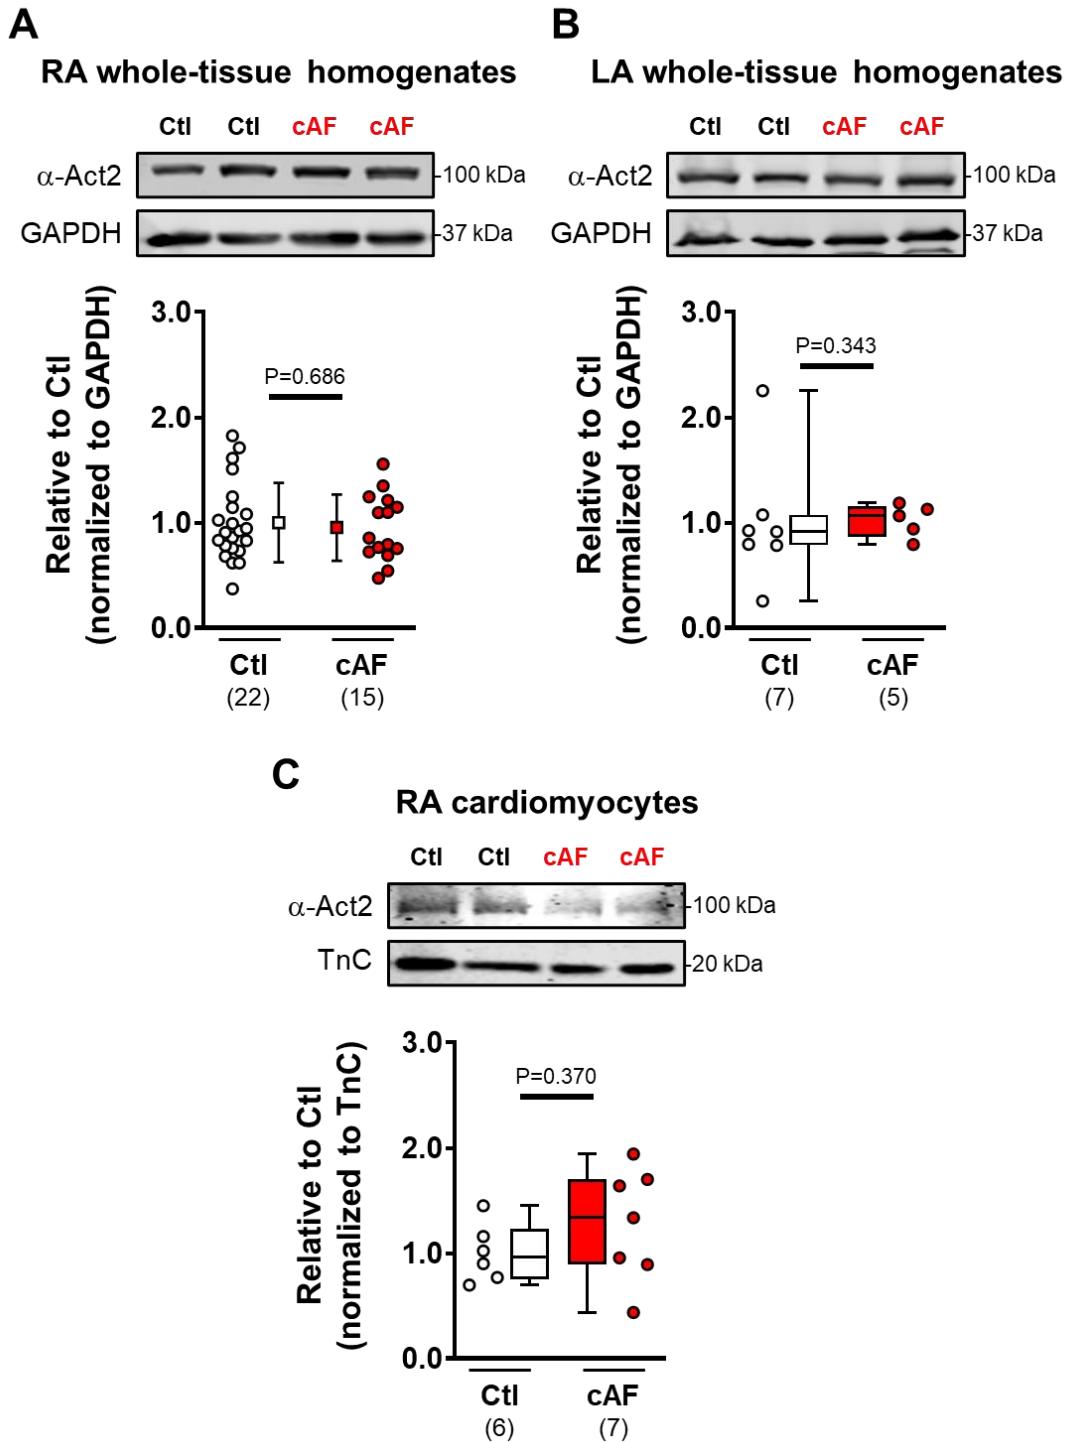

**Figure S23. Protein levels of  $\alpha$ -actinin2 ( $\alpha$ -Act2) in Ctl- and cAF-patients. A-C, Representative Western blots (top) and quantification (bottom) of  $\alpha$ -Act2 in right-atrial (RA) whole-tissue homogenates (A), left-atrial (LA) whole-tissue homogenates (B), or RA-cardiomyocytes (C) of Ctl- and cAF-patients. GAPDH and troponin-C (TnC) were used as loading controls. N-numbers indicate number of patients. P-values are based on Student's *t*-test (A) or Mann-Whitney test (B,C).**

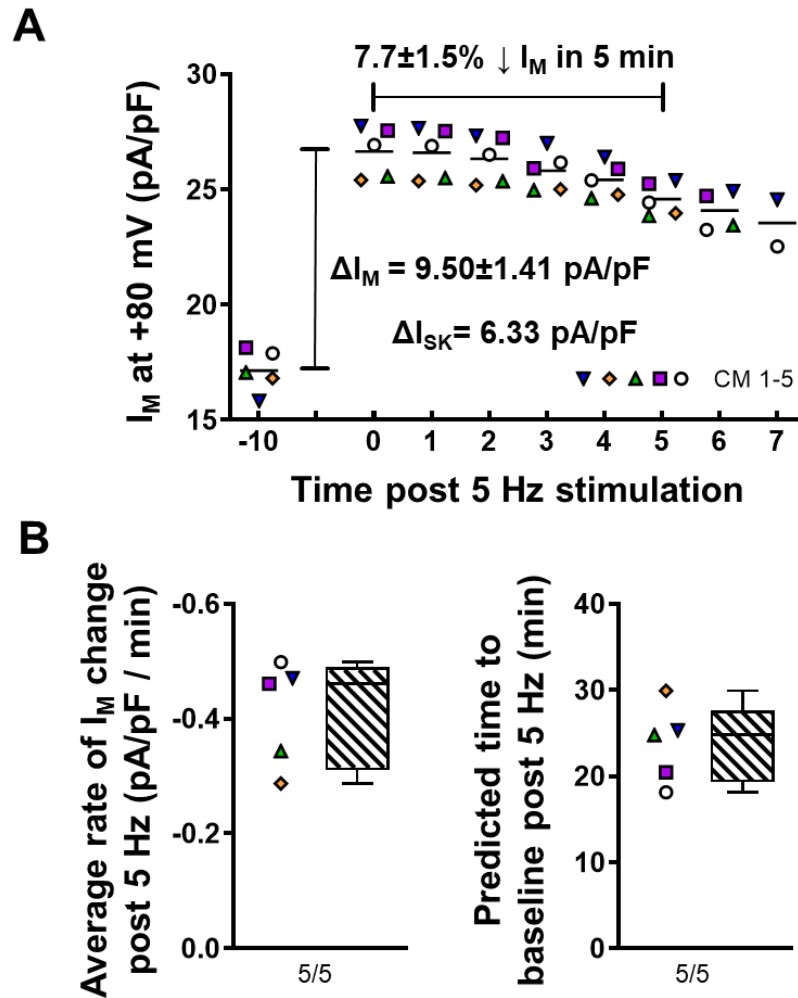

**Figure S24. Reversibility of tachypacing-induced remodeling of membrane currents. A,** Time course of total membrane current ( $I_M$ ) in human right-atrial cardiomyocytes from Ctl patients at +80 mV before 10 minutes of 5 Hz stimulation and every minute after 5 Hz stimulation. The increase in total  $I_M$  due to 10 minutes of 5 Hz stimulation is indicated and compared to the increase in apamin-sensitive small-conductance  $Ca^{2+}$ -activated  $K^+$  current ( $I_{SK}$ ) identified in a separate subgroup of cells (data from [Figure 7B](#)). **B,** The average rate of  $I_M$  decay after 10 minutes of 5 Hz stimulation (**left**) and the extrapolated time required to reach baseline  $I_M$  level based on rate of change and magnitude of tachypacing-induced  $I_M$  increase (**right**) in human right-atrial cardiomyocytes from Ctl patients. N-numbers indicate number of cardiomyocytes/patients.

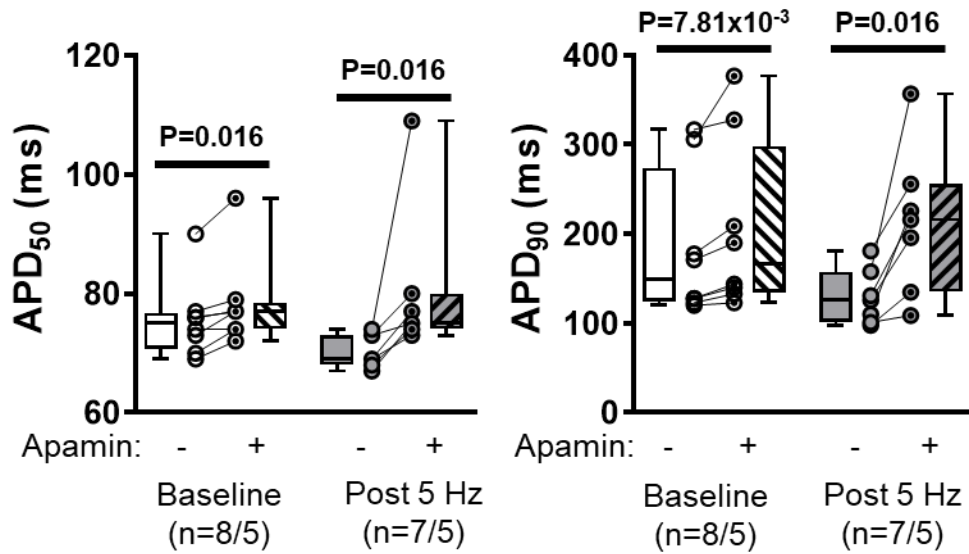

**Figure S25. Effect of apamin on action potential duration (APD) parameters in right-atrial cardiomyocytes from Ctl-patients at baseline or after 10-minutes stimulation at 5 Hz. A,** APD at 50% of repolarization (APD<sub>50</sub>). **B,** APD at 90% of repolarization (APD<sub>90</sub>). N-numbers indicate numbers of cardiomyocytes/patients. P-values are based on Wilcoxon signed rank test for paired samples.

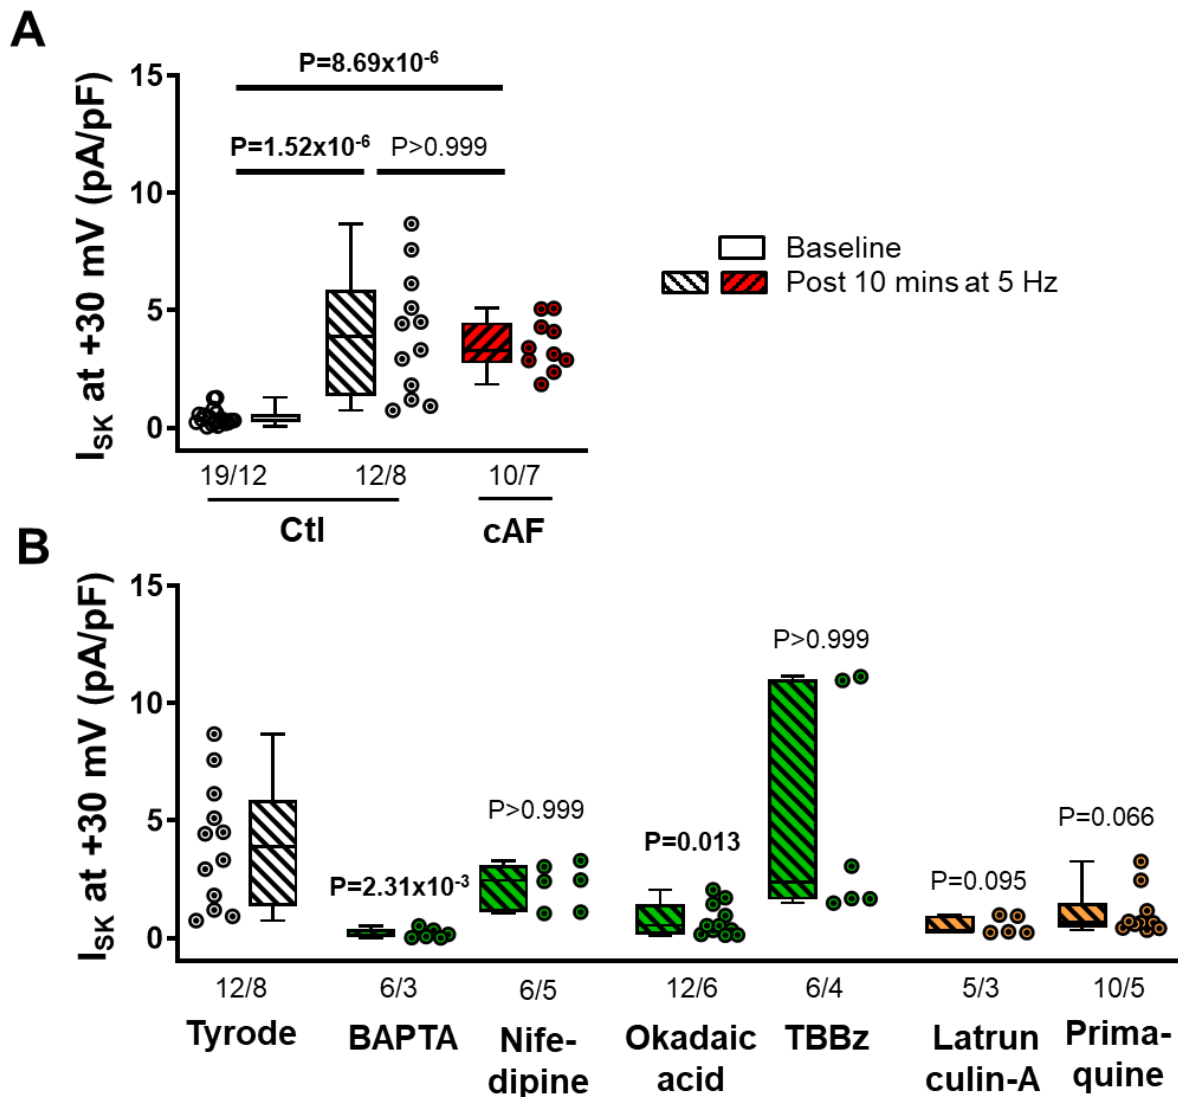

**Figure S26. Tachycardia-dependent upregulation of small-conductance  $Ca^{2+}$ -activated  $K^+$  (SK)-channels.** **A**, Apamin (100-nmol/L)-sensitive  $I_{SK}$  at +30 mV in right-atrial Ctl-cardiomyocytes at baseline (open symbols) and from RA-cardiomyocytes from Ctl- or cAF-patients after 10-minutes of 5-Hz activation (diagonal-patterned bars). **B**, Apamin-sensitive  $I_{SK}$  at +30 mV in RA-cardiomyocytes from Ctl-patients after 10-minutes of 5-Hz activation after pre-incubation with the  $Ca^{2+}$ -chelator BAPTA-AM (30- $\mu$ mol/L for 1-hour), L-type  $Ca^{2+}$ -channel blocker nifedipine (1- $\mu$ mol/L for 3-mins), PP2A-inhibitor okadaic acid (10-nmol/L for 1-hour) or casein kinase type-II inhibitor TBBz (10- $\mu$ mol/L for 1-hour) (green bars; all affecting SK-channel gating), or latrunculin-A (1- $\mu$ mol/L for 2-hours) and primaquine (120- $\mu$ mol/L for 4-hours) (orange bars; both affecting SK-channel trafficking). N-numbers indicate numbers of cardiomyocytes/patients. P-values are based on multilevel mixed models with log-transformed data to account for non-independent measurements in multiple cells from individual patients and are Bonferroni-corrected to account for multiple comparisons. Results correspond to the data shown at +80 mV in [Figure 7](#).

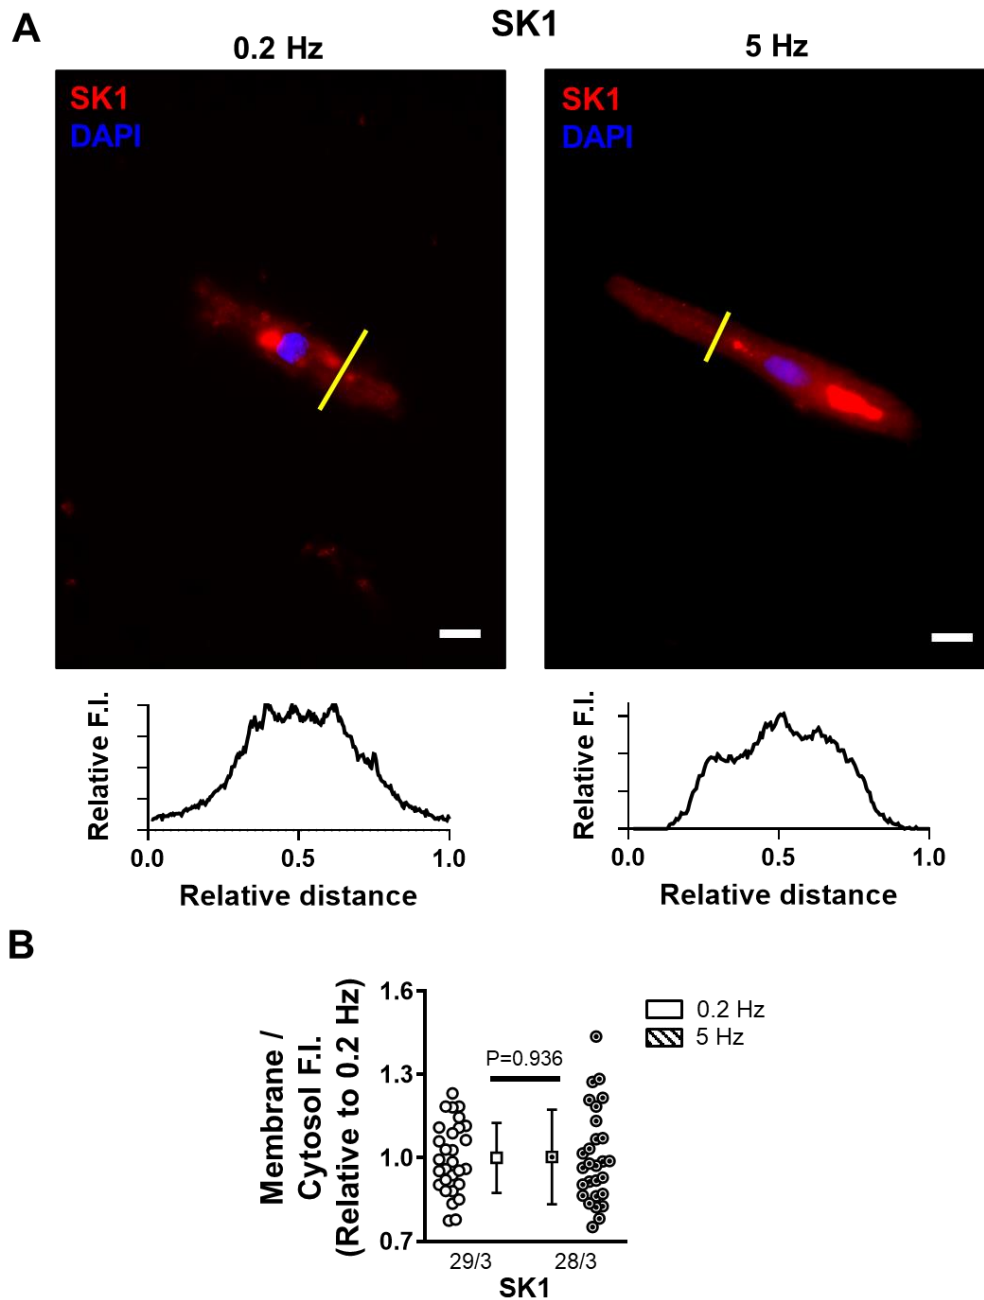

**Figure S27. Membrane localization of small-conductance  $\text{Ca}^{2+}$ -activated  $\text{K}^+$  (SK)-1 channels after field stimulation.** **A**, Representative immunocytochemistry of SK1 in right-atrial cardiomyocytes from Ctl-patients after 10 minutes of field stimulation at 0.2 Hz or 5 Hz. Lower panels show transversal line profiles of fluorescence intensity (F.I.). Scale bars indicate 10- $\mu\text{m}$ . **B**, Average F.I. of SK1 at the membrane (first and last 10% of cell width) compared to the cytosol (middle 80%) after 10 minutes of field stimulation at 0.2 Hz or 5 Hz. Data are normalized to 0.2 Hz. N-numbers indicate numbers of cardiomyocytes/patients. P-values are based on multilevel mixed models to account for non-independent measurements in multiple cells from individual patients and take into account that cardiomyocytes from the same patients were used for 0.2 Hz and 5 Hz.

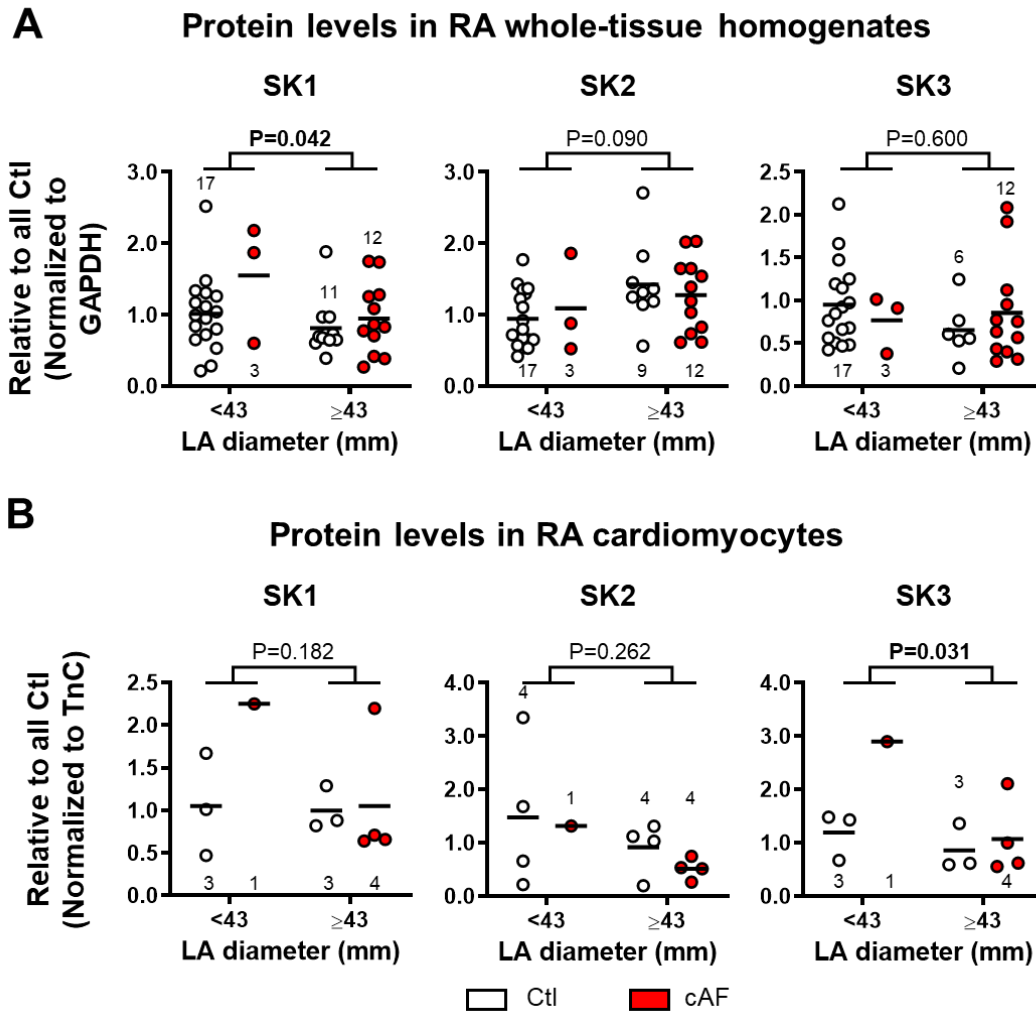

**Figure S28. Association between-atrial (LA) diameter and right-atrial (RA) SK-channel subunit protein levels. A-B, two-way ANOVA analyses of rhythm and LA diameter for SK1-3 in RA whole-tissue homogenates (A, based on Figure S13), or RA-cardiomyocytes (B, based on Figure 2C). N-numbers indicate number of patients. P-values are for the factor LA diameter in the two-way ANOVA.**

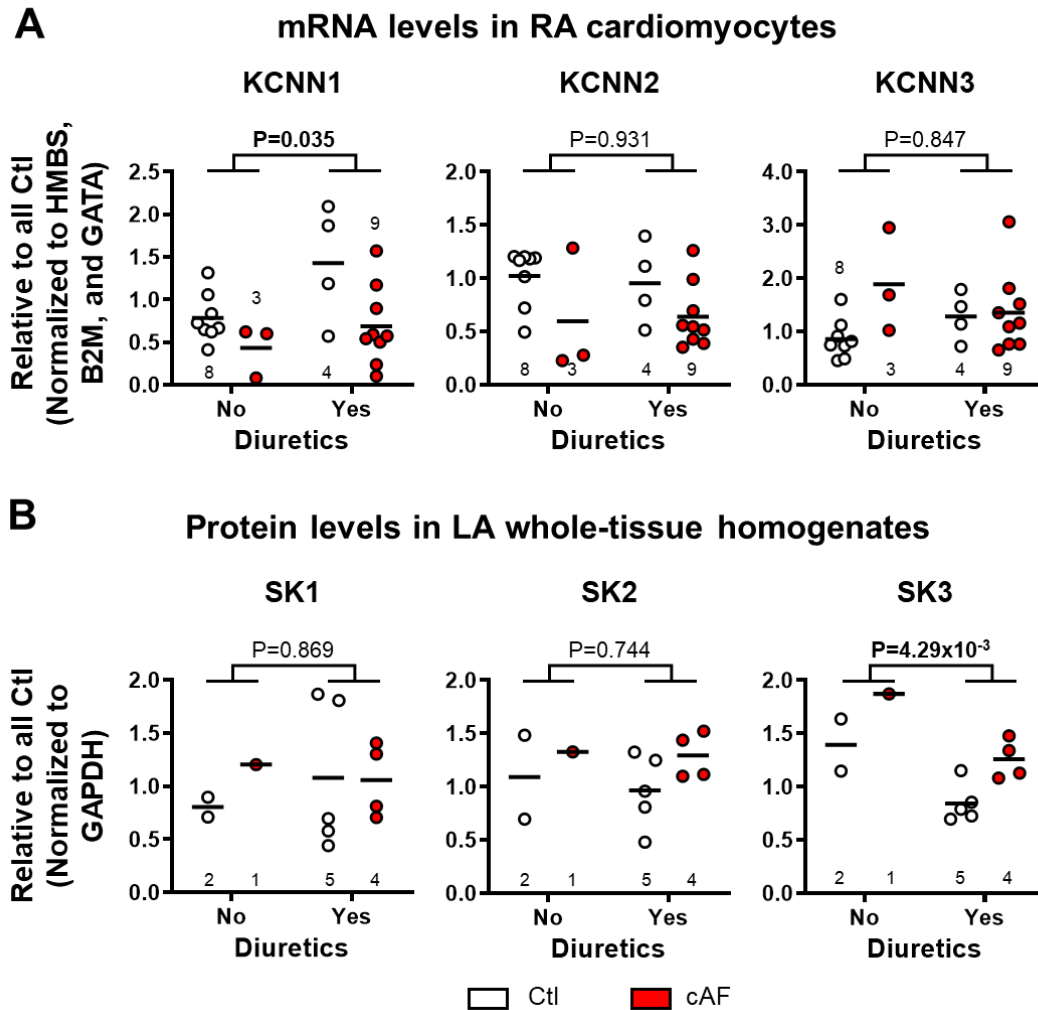

**Figure S29. Association between diuretic use and SK-channel subunit levels.** **A**, two-way ANOVA analyses of rhythm and diuretic use for *KCNN1-3* in right-atrial (RA) cardiomyocytes (based on [Figure S12](#)). **B**, two-way ANOVA analyses of rhythm and diuretic use for SK1-3 in left-atrial (LA) whole-tissue homogenates (based on [Figure S13](#)). N-numbers indicate number of patients. P-values are for the factor diuretics in the two-way ANOVA.



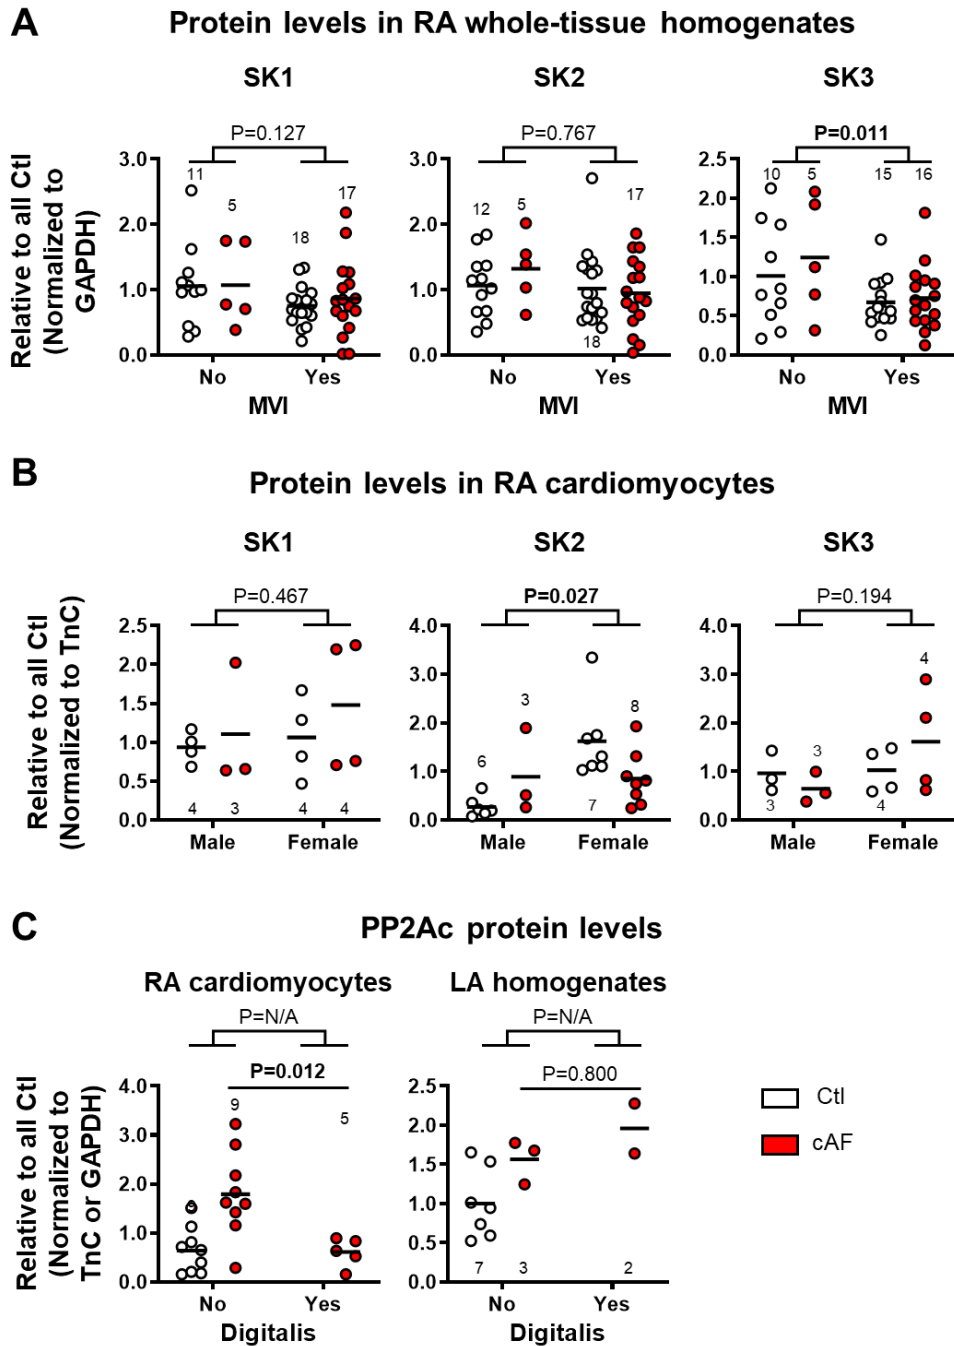

**Figure S30. Significant associations between further clinical variables and SK-subunit or protein phosphatase 2Ac (PP2Ac) protein levels (see Table S13).** A-B, two-way ANOVA analyses of rhythm and mitral valve insufficiency (MVI; **A**) or sex (**B**) for SK1-3 in right-atrial (RA) whole-tissue homogenates (**A**, based on Figure S13) or RA-cardiomyocytes (**B**, based on Figure 2C). **C**, two-way ANOVA analyses of rhythm and digitalis use for PP2Ac in RA-cardiomyocytes (based on Figure 6D) or left-atrial (LA) whole-tissue homogenates (based on Figure S12). N-numbers indicate number of patients. P-values are for the factors MVI, sex or digitalis in the two-way ANOVA. In addition, P-values for Mann-Whitney comparisons between cAF patients with or without digitalis are shown in panel **C**.

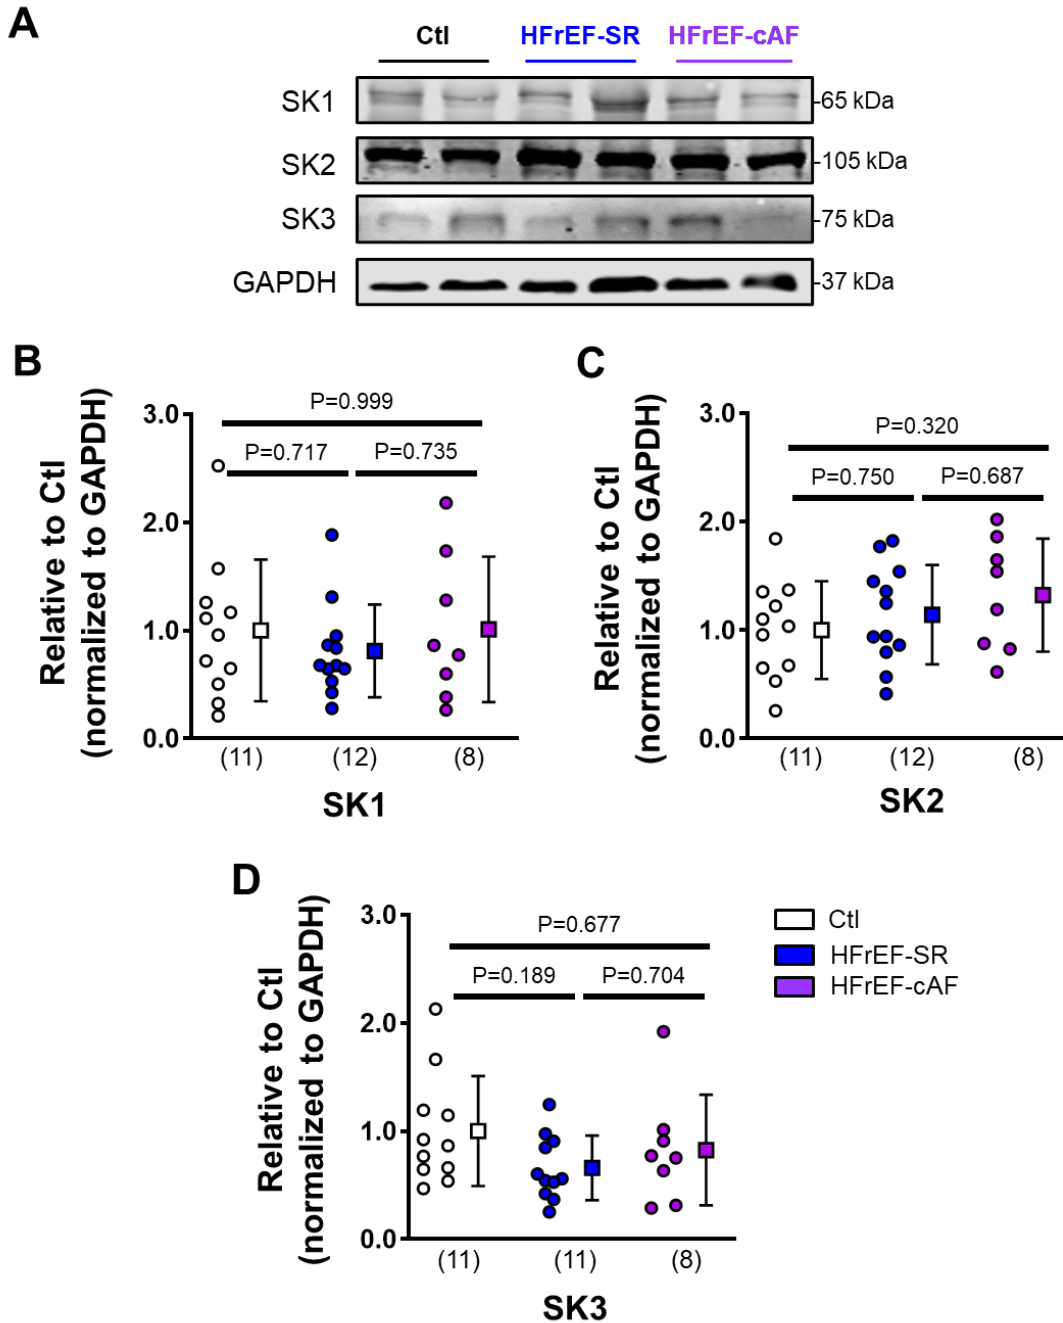

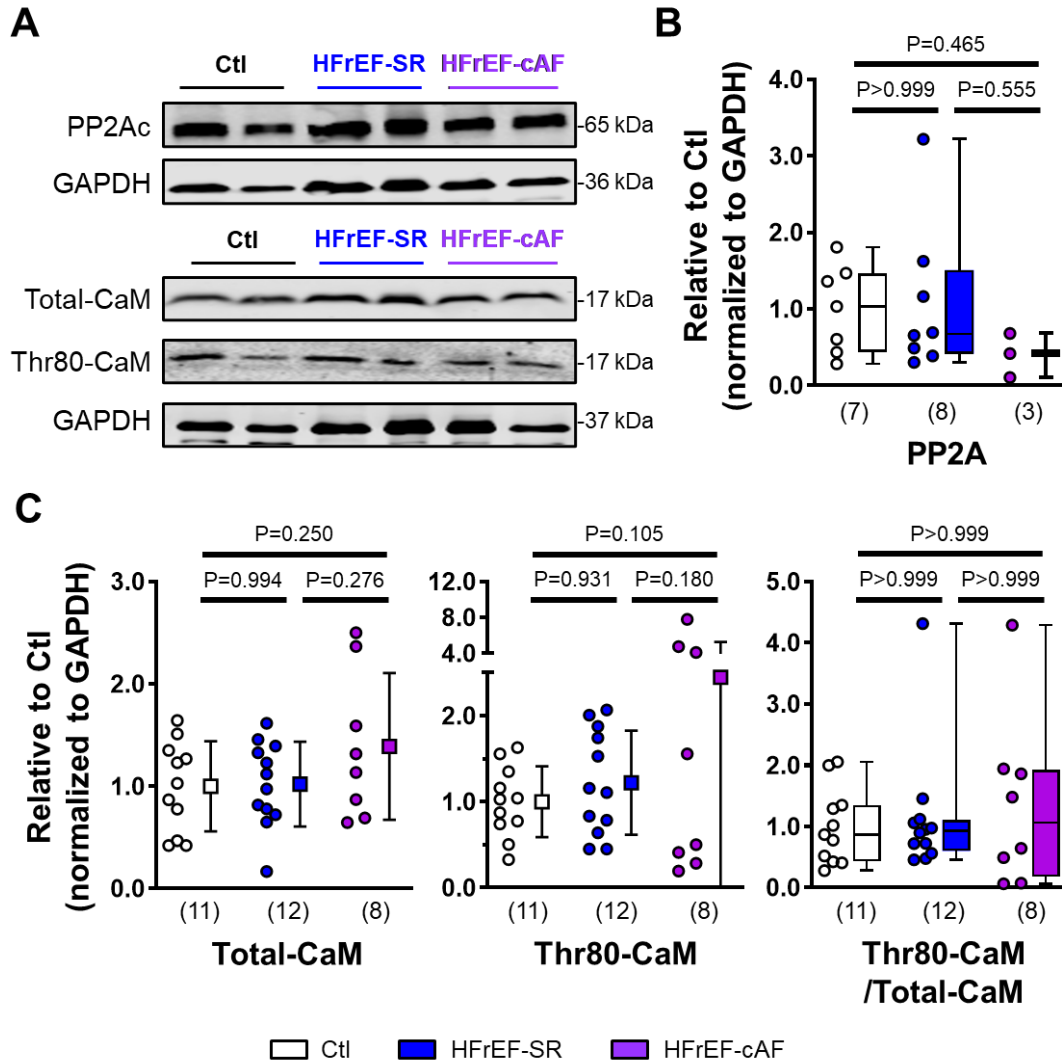

**Figure S32. Effect of heart failure with reduced left-ventricular ejection fraction (HFrEF; LVEF  $\leq$ 35%) on protein levels of calmodulin (CaM) and catalytic protein phosphatase type-2a (PP2Ac).** **A**, Representative Western blots of PP2Ac, as well as total and Thr80-phosphorylated CaM in right-atrial (RA) whole-tissue homogenates of Ctl-patients (no HFrEF, no history of AF), HFrEF-patients without AF (HFrEF-SR), and HFrEF-patients with cAF (HFrEF-cAF). GAPDH was used as loading control. **B**, Quantification of PP2Ac protein levels in RA whole-tissue homogenates of Ctl, HFrEF-SR and HFrEF-cAF patients. **C**, Quantification of total and Thr80-phosphorylated calmodulin, as well as relative phosphorylation ratio in RA whole-tissue homogenates of Ctl, HFrEF-SR and HFrEF-cAF patients. N-numbers indicate number of patients. P-values are based on one-way ANOVA with Tukey's multiple comparisons test.
