# Supplementary material
Source: PubMed Central journal article supplement (PMC10147588)
Supplement: NIHMS1881354-supplement-321858_Major_Resources_Table.pdf [file NIHMS1881354-supplement-321858_Major_Resources_Table.pdf]

## Major Resources Table

In order to allow validation and replication of experiments, all essential research materials listed in the Methods should be included in the Major Resources Table below. Authors are encouraged to use public repositories for protocols, data, code, and other materials and provide persistent identifiers and/or links to repositories when available. Authors may add or delete rows as needed.

### Animals (in vivo studies)

| Species | Vendor or Source | Background Strain | Sex | Persistent ID / URL |
|---------|------------------|-------------------|-----|---------------------|
| N/A     |                  |                   |     |                     |

### Genetically Modified Animals

|                 | Species | Vendor or Source | Background Strain | Other Information | Persistent ID / URL |
|-----------------|---------|------------------|-------------------|-------------------|---------------------|
| Parent - Male   | N/A     |                  |                   |                   |                     |
| Parent - Female |         |                  |                   |                   |                     |

### Cultured Cells

| Name | Vendor or Source | Sex (F, M, or unknown) | Persistent ID / URL |
|------|------------------|------------------------|---------------------|
|      |                  |                        |                     |

### Antibodies

| Target antigen             | Vendor or Source | Catalog #  | Working concentration | Persistent ID / URL                                                                                                                                                                                                                                                                                                 |
|----------------------------|------------------|------------|-----------------------|---------------------------------------------------------------------------------------------------------------------------------------------------------------------------------------------------------------------------------------------------------------------------------------------------------------------|
| $\alpha$ -Act2 (WB)        | Sigma-Aldrich    | A7811      | 1:2500                | <a href="https://www.sigmaaldrich.com/DE/de/product/sigma/a7811">https://www.sigmaaldrich.com/DE/de/product/sigma/a7811</a>                                                                                                                                                                                         |
| $\alpha$ -Act2 (Immunocyt) | Sigma-Aldrich    | A7811      | 1:1000                | <a href="https://www.sigmaaldrich.com/DE/de/product/sigma/a7811">https://www.sigmaaldrich.com/DE/de/product/sigma/a7811</a>                                                                                                                                                                                         |
| BKCa (WB)                  | Alomone labs     | APC-107    | 1:500                 | <a href="https://www.alomone.com/p/anti-kca1-1-1184-1200/APC-107">https://www.alomone.com/p/anti-kca1-1-1184-1200/APC-107</a>                                                                                                                                                                                       |
| CaM-Total (WB)             | Abcam            | ab45689    | 1:1000                | <a href="https://www.abcam.com/calmodulin-123-antibody-ep799y-c-terminal-ab45689.html">https://www.abcam.com/calmodulin-123-antibody-ep799y-c-terminal-ab45689.html</a>                                                                                                                                             |
| CaM-Total (Immunohis)      | Abcam            | ab45689    | 1:200                 | <a href="https://www.abcam.com/calmodulin-123-antibody-ep799y-c-terminal-ab45689.html">https://www.abcam.com/calmodulin-123-antibody-ep799y-c-terminal-ab45689.html</a>                                                                                                                                             |
| Thr80-CaM (WB)             | ProSci           | 80-027     | 1:500                 | <a href="https://www.prosci-inc.com/calmodulin-phospho-thr79-ser81-antibody-80-027.html">https://www.prosci-inc.com/calmodulin-phospho-thr79-ser81-antibody-80-027.html</a>                                                                                                                                         |
| Thr80-CaM (WB)             | Lsbio            | LS-C354566 | 1:1000                | <a href="https://www.lsbio.com/antibodies/calm1-antibody-calmodulin-antibody-phospho-thr80-ser82-icc-if-immunofluorescence-ihc-wb-western-ls-c354566/365687">https://www.lsbio.com/antibodies/calm1-antibody-calmodulin-antibody-phospho-thr80-ser82-icc-if-immunofluorescence-ihc-wb-western-ls-c354566/365687</a> |
| Thr80-CaM (Immunohis)      | ProSci           | 80-027     | 1:200                 | <a href="https://www.prosci-inc.com/calmodulin-phospho-thr79-ser81-antibody-80-027.html">https://www.prosci-inc.com/calmodulin-phospho-thr79-ser81-antibody-80-027.html</a>                                                                                                                                         |
| CKII $\alpha$ (WB)         | Millipore        | 04-1129    | 1:1000                | Not available                                                                                                                                                                                                                                                                                                       |
| CKII $\alpha$ (WB)         | Millipore        | 05-1431    | 1:1000                | <a href="https://www.merckmillipore.com/DE/de/product/Anti-Casein-Kinase-2-Antibody-1AD9,MM_NF-05-1431">https://www.merckmillipore.com/DE/de/product/Anti-Casein-Kinase-2-Antibody-1AD9,MM_NF-05-1431</a>                                                                                                           |

DOI [to be added]

|                              |               |             |         |                                                                                                                                                                                                                                 |
|------------------------------|---------------|-------------|---------|---------------------------------------------------------------------------------------------------------------------------------------------------------------------------------------------------------------------------------|
| GAPDH                        | HyTest        | 5G4         | 1:20000 | <a href="https://shop.hytest.fi/product/glyceraldehyde-3-phosphate-dehydrogenase-gapdh-antibody">https://shop.hytest.fi/product/glyceraldehyde-3-phosphate-dehydrogenase-gapdh-antibody</a>                                     |
| PP2Ac (WB)                   | Merck         | 07-324      | 1:1000  | <a href="https://www.merckmillipore.com/DE/de/product/Anti-PP2A-Antibody-C-subunit,MM_NF-07-324">https://www.merckmillipore.com/DE/de/product/Anti-PP2A-Antibody-C-subunit,MM_NF-07-324</a>                                     |
| PR65/55 (WB)                 | Merck         | 539521      | 1:1000  | <a href="https://www.merckmillipore.com/DE/de/product/Anti-PP2A-B-14-27-PR55-Rabbit-pAb,EMD_BIO-539521">https://www.merckmillipore.com/DE/de/product/Anti-PP2A-B-14-27-PR55-Rabbit-pAb,EMD_BIO-539521</a>                       |
| SK1 (WB)                     | Alomone labs  | APC-039     | 1:1000  | <a href="https://www.alomone.com/p/anti-kca2-1-sk1-skca1/APC-039">https://www.alomone.com/p/anti-kca2-1-sk1-skca1/APC-039</a>                                                                                                   |
| SK1 (Immunocyt)              | Alomone labs  | APC-039     | 1:200   | <a href="https://www.alomone.com/p/anti-kca2-1-sk1-skca1/APC-039">https://www.alomone.com/p/anti-kca2-1-sk1-skca1/APC-039</a>                                                                                                   |
| SK2 (WB)                     | Alomone labs  | APC-028     | 1:1000  | <a href="https://www.alomone.com/p/anti-kca2-2-sk2/APC-028">https://www.alomone.com/p/anti-kca2-2-sk2/APC-028</a>                                                                                                               |
| SK2 (WB)                     | Origene       | AP10032PU-N | 1:500   | <a href="https://www.origene.com/catalog/antibodies/primary-antibodies/ap10032pu-n/kcnn2-goat-polyclonal-antibody">https://www.origene.com/catalog/antibodies/primary-antibodies/ap10032pu-n/kcnn2-goat-polyclonal-antibody</a> |
| SK2 (Immunocyt)              | Alomone labs  | APC-028     | 1:200   | <a href="https://www.alomone.com/p/anti-kca2-2-sk2/APC-028">https://www.alomone.com/p/anti-kca2-2-sk2/APC-028</a>                                                                                                               |
| SK2 (Immunohis)              | Biorbyt       | orb333956   | 1:200   | <a href="https://www.biorbyt.com/sk2-antibody-orb333956.html">https://www.biorbyt.com/sk2-antibody-orb333956.html</a>                                                                                                           |
| SK2 (Immunohis)              | Alomone labs  | APC-028     | 1:200   | <a href="https://www.alomone.com/p/anti-kca2-2-sk2/APC-028">https://www.alomone.com/p/anti-kca2-2-sk2/APC-028</a>                                                                                                               |
| SK3 (WB)                     | Alomone labs  | APC-025     | 1:1000  | <a href="https://www.alomone.com/p/anti-kca2-3-sk3-n-term/APC-025">https://www.alomone.com/p/anti-kca2-3-sk3-n-term/APC-025</a>                                                                                                 |
| SK3 (Immunocyt)              | Alomone labs  | APC-025     | 1:200   | <a href="https://www.alomone.com/p/anti-kca2-3-sk3-n-term/APC-025">https://www.alomone.com/p/anti-kca2-3-sk3-n-term/APC-025</a>                                                                                                 |
| SK3 (Immunohis)              | Alomone labs  | APC-025     | 1:200   | <a href="https://www.alomone.com/p/anti-kca2-3-sk3-n-term/APC-025">https://www.alomone.com/p/anti-kca2-3-sk3-n-term/APC-025</a>                                                                                                 |
| SK4 (WB)                     | Alomone labs  | APC-064     | 1:500   | <a href="https://www.alomone.com/p/anti-kca3-1-sk4-ikca1/APC-064">https://www.alomone.com/p/anti-kca3-1-sk4-ikca1/APC-064</a>                                                                                                   |
| TnC (WB)                     | Fitzgerald    | 10R-T122A   | 1:1000  | <a href="https://www.fitzgerald-fii.com/troponin-c-antibody-cardiac-10r-t122a.html">https://www.fitzgerald-fii.com/troponin-c-antibody-cardiac-10r-t122a.html</a>                                                               |
| Anti-Mouse IgG HRP           | Santa Cruz    | sc-2302     | 1:20000 | <a href="https://datasheets.scbt.com/sc-2302.pdf">https://datasheets.scbt.com/sc-2302.pdf</a>                                                                                                                                   |
| Anti-Rabbit IgG HRP          | Sigma-Aldrich | A0545       | 1:20000 | <a href="https://www.sigmaaldrich.com/DE/de/product/sigma/a0545">https://www.sigmaaldrich.com/DE/de/product/sigma/a0545</a>                                                                                                     |
| Anti-Goat IgG HRP            | Santa Cruz    | sc-2020     | 1:20000 | <a href="https://www.scbt.com/de/p/donkey-anti-goat-igg-hrp">https://www.scbt.com/de/p/donkey-anti-goat-igg-hrp</a>                                                                                                             |
| Anti-Mouse IgG IRDye® 680RD  | Li-Cor        | 926-68070   | 1:20000 | <a href="https://www.licor.com/bio/reagents/irdye-680rd-goat-anti-mouse-igg-secondary-antibody">https://www.licor.com/bio/reagents/irdye-680rd-goat-anti-mouse-igg-secondary-antibody</a>                                       |
| Anti-Rabbit IgG-IRDye® 680RD | Li-Cor        | 926-68071   | 1:20000 | <a href="https://www.licor.com/bio/reagents/irdye-680rd-goat-anti-rabbit-igg-secondary-antibody">https://www.licor.com/bio/reagents/irdye-680rd-goat-anti-rabbit-igg-secondary-antibody</a>                                     |
| Anti-Goat IgG-IRDye® 680RD   | Li-Cor        | 926-68074   | 1:20000 | <a href="https://www.licor.com/bio/reagents/irdye-680rd-donkey-anti-goat-igg-secondary-antibody">https://www.licor.com/bio/reagents/irdye-680rd-donkey-anti-goat-igg-secondary-antibody</a>                                     |
| Anti-Mouse IgG IRDye® 800CW  | Li-Cor        | 926-32210   | 1:20000 | <a href="https://www.licor.com/bio/reagents/irdye-800cw-goat-anti-mouse-igg-secondary-antibody">https://www.licor.com/bio/reagents/irdye-800cw-goat-anti-mouse-igg-secondary-antibody</a>                                       |
| Anti-Rabbit IgG-IRDye® 800CW | Li-Cor        | 926-32211   | 1:20000 | <a href="https://www.licor.com/bio/reagents/irdye-800cw-goat-anti-rabbit-igg-secondary-antibody">https://www.licor.com/bio/reagents/irdye-800cw-goat-anti-rabbit-igg-secondary-antibody</a>                                     |
| Anti-Goat IgG-IRDye® 800CW   | Li-Cor        | 926-32214   | 1:20000 | <a href="https://www.licor.com/bio/reagents/irdye-800cw-donkey-anti-goat-igg-secondary-antibody">https://www.licor.com/bio/reagents/irdye-800cw-donkey-anti-goat-igg-secondary-antibody</a>                                     |

|                                       |                        |             |       |                                                                                                                                                                                                                                                 |
|---------------------------------------|------------------------|-------------|-------|-------------------------------------------------------------------------------------------------------------------------------------------------------------------------------------------------------------------------------------------------|
| Anti-Rabbit IgG-FITC                  | Jackson ImmunoResearch | 111-095-008 | 1:200 | <a href="https://www.jacksonimmuno.com/catalog/products/111-095-008">https://www.jacksonimmuno.com/catalog/products/111-095-008</a>                                                                                                             |
| Anti-Mouse IgG-FITC                   | Jackson ImmunoResearch | 115-096-008 | 1:200 | <a href="https://www.jacksonimmuno.com/catalog/products/115-096-008">https://www.jacksonimmuno.com/catalog/products/115-096-008</a>                                                                                                             |
| Anti-Rabbit IgG-Cy <sup>TM</sup> 3    | Jackson ImmunoResearch | 111-165-045 | 1:200 | <a href="https://www.jacksonimmuno.com/catalog/products/111-165-045">https://www.jacksonimmuno.com/catalog/products/111-165-045</a>                                                                                                             |
| Anti-Mouse IgG-Cy <sup>TM</sup> 3     | Jackson ImmunoResearch | 115-165-062 | 1:200 | <a href="https://www.jacksonimmuno.com/catalog/products/115-165-062">https://www.jacksonimmuno.com/catalog/products/115-165-062</a>                                                                                                             |
| Anti-Rabbit IgG-Cy <sup>TM</sup> 5    | Jackson ImmunoResearch | 111-175-144 | 1:200 | <a href="https://www.jacksonimmuno.com/catalog/products/111-175-144">https://www.jacksonimmuno.com/catalog/products/111-175-144</a>                                                                                                             |
| Anti-Mouse IgG-Alexa <sup>®</sup> 405 | Abcam                  | ab175660    | 1:200 | <a href="https://www.abcam.com/goat-mouse-igg-hl-alexa-fluor-405-ab175660.html">https://www.abcam.com/goat-mouse-igg-hl-alexa-fluor-405-ab175660.html</a>                                                                                       |
| Wheat Germ Agglutinin (WGA)           | Invitrogen             | W11263      | 1:500 | <a href="https://www.fishersci.de/shop/products/molecular-probes-wheat-germ-agglutinin-alexa-fluor-350-conjugate/11590806">https://www.fishersci.de/shop/products/molecular-probes-wheat-germ-agglutinin-alexa-fluor-350-conjugate/11590806</a> |

#### DNA/cDNA Clones

| Clone Name | Sequence | Source / Repository | Persistent ID / URL |
|------------|----------|---------------------|---------------------|
|            |          |                     |                     |
|            |          |                     |                     |
|            |          |                     |                     |

#### qPCR oligonucleotide primer sequences

| Description         | Source / Repository                                   | Persistent ID / URL |
|---------------------|-------------------------------------------------------|---------------------|
| <i>KCNN1</i> (qPCR) | TaqMan (Applied Biosystems; Thermo Fisher Scientific) | Hs00158457_m1       |
| <i>KCNN1</i> (dPCR) | TaqMan (Applied Biosystems; Thermo Fisher Scientific) | Hs01109326_m1       |
| <i>KCNN2</i>        | TaqMan (Applied Biosystems; Thermo Fisher Scientific) | Hs00222059_m1       |
| <i>KCNN3</i>        | TaqMan (Applied Biosystems; Thermo Fisher Scientific) | Hs01546821_m1       |
| <i>B2M</i>          | TaqMan (Applied Biosystems; Thermo Fisher Scientific) | Hs99999907_m1       |
| <i>GATA4</i>        | TaqMan (Applied Biosystems; Thermo Fisher Scientific) | Hs00171403_m1       |
| <i>HMBS</i>         | TaqMan (Applied Biosystems; Thermo Fisher Scientific) | Hs00609296_g1       |

#### Data & Code Availability

| Description                                      | Source / Repository | Persistent ID / URL                                                         |
|--------------------------------------------------|---------------------|-----------------------------------------------------------------------------|
| Matlab code for human atrial cardiomyocyte model | GitHub              | <a href="https://github.com/drgrandilab">https://github.com/drgrandilab</a> |
| Full Western blots                               | Online Supplement   |                                                                             |

#### Other

DOI [to be added]

| <b>Description</b>                          | <b>Source / Repository</b>                                                | <b>Persistent ID / URL</b> |
|---------------------------------------------|---------------------------------------------------------------------------|----------------------------|
| Human right-atrial samples                  | University Medical Center Essen, Germany                                  | #12-5268-BO                |
| Human right-atrial samples                  | Medical Faculty Mannheim, Ruprecht Karl University of Heidelberg, Germany | No. 2011-216N-MA           |
| Paired human right- and left-atrial samples | Medical Faculty, Ruhr-Universität Bochum                                  | No. AZ 21/2013             |
